# Supplementary material for: Association of systemic immune-inflammation index with body mass index, waist circumference and prevalence of obesity in US adults
Source: PubMed Central journal article supplement — Sci Rep. 2024 Sep 27;14:22086. doi: 10.1038/s41598-024-73659-3 (PMC11436774; doi:10.1038/s41598-024-73659-3), 2024-09-27
Supplement: 41598_2024_73659_MOESM1_ESM.pdf [file 41598_2024_73659_MOESM1_ESM.pdf]

## Association of systemic immune-inflammation index with body mass index, waist circumference and prevalence of obesity in US adults

Shuo Yang, Shan Zhang, Jinrong Deng, Jingjing Xie, Jianyong Zhang\*, Ertao Jia\*

**Supplementary Table S1.** The basis for selecting covariates.

| Confounding relationship         | Justification                                                                                                                                                                                                                                                                                                                                                                                                                                                                                                              |
|----------------------------------|----------------------------------------------------------------------------------------------------------------------------------------------------------------------------------------------------------------------------------------------------------------------------------------------------------------------------------------------------------------------------------------------------------------------------------------------------------------------------------------------------------------------------|
| Age → BMI                        | BMI tends to increase with age due to changes in metabolism, loss of muscle mass, and hormonal changes associated with aging <sup>1,2</sup> .                                                                                                                                                                                                                                                                                                                                                                              |
| Gender → Waist circumference     | A systematic review comparing gender-specific waist circumference (WC) levels in Aboriginal and non-Aboriginal Australians found that of 17 selected cross-sectional studies, 9 focused on Aboriginal and 8 on non-Aboriginal Australians. Seven studies reported significantly higher WC estimates among indigenous females than males. On the other hand, non-indigenous males had significantly higher WC levels than females <sup>3</sup> .                                                                            |
| Race → BMI                       | BMI scores were consistently higher for women, racial/ethnic minority groups and those from a lower socio-economic position (SEP) <sup>4</sup> . Among the U.S. born in 2011, Chinese adults have an average BMI below the threshold for overweight, whereas blacks, Mexicans, and Puerto Ricans have average BMIs in the obese range <sup>5</sup> .                                                                                                                                                                       |
| Educational level → BMI, obesity | A cross-sectional population-based study was carried out with 1720 adults aged 20-59 in southern Brazil, in the fully adjusted model, the WC was 4.67 cm higher ( $p < 0.05$ ) and the BMI was 1.12 kg/m <sup>2</sup> higher ( $p < 0.05$ ) in the women residents of low education neighborhoods compared to the residents of high education areas. In the same group, the chance of central obesity and general obesity was, respectively, 2.05 (IC95% 1.19-3.52) and 1.85 (IC95% 1.04-3.29) times higher <sup>6</sup> . |
| Marital status → Obesity         | A cross-sectional national telephone survey of 3,025 U.S. adults aged 20-64 years showed that married men were significantly fatter and more likely to be obese than never married or previously married men, even when demographic, social, and physical variables were controlled <sup>7</sup> .                                                                                                                                                                                                                         |
| poverty income ratio (PIR) → BMI | BMI scores were consistently higher for women, racial/ethnic minority groups and those from a lower socio-economic position (SEP) <sup>4</sup> .                                                                                                                                                                                                                                                                                                                                                                           |
| Energy intake → Obesity          | Obesity prevalence has increased, and increased energy intake or decreased physical activity are the two most obvious contributing factors <sup>8</sup> . Increased energy intake is a major cause of postpartum obesity in women <sup>9</sup> .                                                                                                                                                                                                                                                                           |
| Physical activity → SII, obesity | Physical activity has emerged as an independent anti-inflammatory factor, distinct from its role in promoting weight loss <sup>10</sup> . Ding et al. conducted a study that revealed a negative association between leisure-                                                                                                                                                                                                                                                                                              |

|                          |                                                                                                                                                                                                                                                                                                                                                                                                                                                                                                       |
|--------------------------|-------------------------------------------------------------------------------------------------------------------------------------------------------------------------------------------------------------------------------------------------------------------------------------------------------------------------------------------------------------------------------------------------------------------------------------------------------------------------------------------------------|
|                          | time physical activity and inflammatory biomarkers in both overweight and obese populations. Notably, vigorous leisure-time physical activity demonstrated superior efficacy over moderate activity, particularly in regulating inflammation <sup>11</sup> . Moderate- and vigorous-intensity physical activity substantially reduces the risk of obesity <sup>12</sup> .                                                                                                                             |
| Sleep disorder → obesity | Short sleep duration is associated with higher risk of central obesity in adults <sup>13</sup> . Fragmented sleep is independently associated with an increased risk of both general and abdominal obesity <sup>14</sup> .                                                                                                                                                                                                                                                                            |
| Smoke →SII, obesity      | Acute cigarette smoking is followed by a temporary increase of systemic markers of oxidative stress, inflammation, and thrombosis, indicated by increased thiobarbituric acid reactive substances (TBARS), neutrophil elastase, leukotrienes, and leukocytes. In long-term smokers, these acute inflammatory processes induce tissue damage and turn into chronic inflammatory processes <sup>15,16</sup> . In addition, continuous secondhand smoke can be a risk factor for obesity <sup>17</sup> . |
| Alcohol use → Obesity    | In a cross-sectional study using data from the 2010 U.S. National Health Interview Survey, it was found that infrequent alcohol use was associated with obesity and higher BMI in adults <sup>18</sup> . In another cross-sectional study, more frequent alcohol consumption was found to be independently associated with reduced odds of obesity <sup>19</sup> .                                                                                                                                    |

## References

- 1 Bales, C. W. & Ritchie, C. S. Sarcopenia, weight loss, and nutritional frailty in the elderly. *Annual review of nutrition* **22**, 309-323, doi:10.1146/annurev.nutr.22.010402.102715 (2002).
- 2 Kyle, U. G. *et al.* Age-related differences in fat-free mass, skeletal muscle, body cell mass and fat mass between 18 and 94 years. *European journal of clinical nutrition* **55**, 663-672, doi:10.1038/sj.ejcn.1601198 (2001).
- 3 Adegbija, O. O. & Wang, Z. Gender variations in waist circumference levels between Aboriginal and non-Aboriginal Australian populations: a systematic review. *Obesity research & clinical practice* **8**, e513-524, doi:10.1016/j.orcp.2013.11.009 (2014).
- 4 Clarke, P., O'Malley, P. M., Johnston, L. D. & Schulenberg, J. E. Social disparities in BMI trajectories across adulthood by gender, race/ethnicity and lifetime socio-economic position: 1986-2004. *International journal of epidemiology* **38**, 499-509, doi:10.1093/ije/dyn214 (2009).
- 5 Krueger, P. M., Coleman-Minahan, K. & Rooks, R. N. Race/ethnicity, nativity and trends in BMI among U.S. adults. *Obesity (Silver Spring, Md.)* **22**, 1739-1746, doi:10.1002/oby.20744 (2014).
- 6 Boing, A. F. & Subramanian, S. V. The influence of area-level education on body mass index, waist circumference and obesity according to gender. *International journal of public health* **60**, 727-736, doi:10.1007/s00038-015-0721-8 (2015).
- 7 Sobal, J., Rauschenbach, B. S. & Frongillo, E. A., Jr. Marital status, fatness and obesity. *Social science & medicine (1982)* **35**, 915-923, doi:10.1016/0277-9536(92)90106-z (1992).

- 8 Church, T. & Martin, C. K. The Obesity Epidemic: A Consequence of Reduced Energy Expenditure and the Uncoupling of Energy Intake? *Obesity (Silver Spring, Md.)* **26**, 14-16, doi:10.1002/oby.22072 (2018).
- 9 Most, J. *et al.* Increased Energy Intake After Pregnancy Determines Postpartum Weight Retention in Women With Obesity. *The Journal of clinical endocrinology and metabolism* **105**, e1601-1611, doi:10.1210/clinem/dgz330 (2020).
- 10 Nicklas, B. J., You, T. & Pahor, M. Behavioural treatments for chronic systemic inflammation: effects of dietary weight loss and exercise training. *CMAJ : Canadian Medical Association journal = journal de l'Association medicale canadienne* **172**, 1199-1209, doi:10.1503/cmaj.1040769 (2005).
- 11 Ding, Y. & Xu, X. Dose-response relationship between leisure-time physical activity and biomarkers of inflammation and oxidative stress in overweight/obese populations. *Journal of science and medicine in sport* **26**, 616-621, doi:10.1016/j.jsams.2023.09.010 (2023).
- 12 O'Donovan, G. *et al.* Physical Activity and Obesity Risk in Adults in Colombia: The Prospective Urban Rural Epidemiology (PURE) Study. *Medicine and science in sports and exercise* **56**, 1291-1296, doi:10.1249/mss.0000000000003413 (2024).
- 13 Kohanmoo, A. *et al.* Short sleep duration is associated with higher risk of central obesity in adults: A systematic review and meta-analysis of prospective cohort studies. *Obesity science & practice* **10**, e772, doi:10.1002/osp4.772 (2024).
- 14 Xu, Y. X. *et al.* Association of sleep fragmentation with general and abdominal obesity: a population-based longitudinal study. *International journal of obesity (2005)*, doi:10.1038/s41366-024-01547-x (2024).
- 15 Liu, J. *et al.* Relationship between biomarkers of cigarette smoke exposure and biomarkers of inflammation, oxidative stress, and platelet activation in adult cigarette smokers. *Cancer epidemiology, biomarkers & prevention : a publication of the American Association for Cancer Research, cosponsored by the American Society of Preventive Oncology* **20**, 1760-1769, doi:10.1158/1055-9965.Epi-10-0987 (2011).
- 16 Batatinha, H. A. P., Rosa Neto, J. C. & Krüger, K. Inflammatory features of obesity and smoke exposure and the immunologic effects of exercise. *Exercise immunology review* **25**, 96-111 (2019).
- 17 Miyamura, K. *et al.* Impact of exposure to secondhand smoke on the risk of obesity in early adolescence. *Pediatric research* **93**, 260-266, doi:10.1038/s41390-022-02231-4 (2023).
- 18 Shaikh, R. A., Siahpush, M., Singh, G. K. & Tibbits, M. Socioeconomic Status, Smoking, Alcohol use, Physical Activity, and Dietary Behavior as Determinants of Obesity and Body Mass Index in the United States: Findings from the National Health Interview Survey. *International journal of MCH and AIDS* **4**, 22-34, doi:10.21106/ijma.53 (2015).
- 19 Rohrer, J. E., Rohland, B. M., Denison, A. & Way, A. Frequency of alcohol use and obesity in community medicine patients. *BMC family practice* **6**, 17, doi:10.1186/1471-2296-6-17 (2005).

## Supplementary Data S2. The commands used in the analysis

```
R.Version4RUN<-343;
R.LibLocation <- "C:/Users/15949/AppData/Roaming/EmpowerRCH/R343/library"
#***** Regarding ALL Following R Functions *****
#***** COPYRIGHT (c) 2010 X&Y Solutions, ALL RIGHT RESERVED *****
#***** www.EmpowerStats.com *****
#*****

Sys.setlocale("LC_TIME", "C")
library(doBy,lib.loc=R.LibLocation)
library(plotrix,lib.loc=R.LibLocation)
library(stringi,lib.loc=R.LibLocation)
library(stringr,lib.loc=R.LibLocation)
library(survival,lib.loc=R.LibLocation)
library(rms,lib.loc=R.LibLocation)
library(nnet,lib.loc=R.LibLocation)
library(car,lib.loc=R.LibLocation)
library(mgcv,lib.loc=R.LibLocation)
pdfwd<-6; pdfht<-6
setwd("C:/Users/15949/Desktop/Obesity/PROJ3_1_tbl1")
load("C:/Users/15949/Desktop/Obesity/SIIobesityAA.Rdata")
if (length(which(ls()=="EmpowerStatsR"))==0) EmpowerStatsR<-get(ls()[1])
names(EmpowerStatsR)<-toupper(names(EmpowerStatsR))

rankvar <- function(var, num) {
  qprobs <- 1/num
  if (num>2) {for (i in (2:(num-1))) {qprobs <- c(qprobs, 1/num * i) }}
  outvar <- rep(0, times=length(var))
  outvar[is.na(var)] <- NA
  cutpoints <- quantile(var,probs=qprobs, na.rm=TRUE)
  for (k in (1:length(cutpoints))) {outvar[var>=cutpoints[k]] <- k}
  tmp<-c(min(var,na.rm=TRUE),cutpoints,max(var,na.rm=TRUE))
  names(tmp)<-c("Min",names(cutpoints),"Max")
  print(tmp)
  return(outvar)
}

attach(EmpowerStatsR)
sink("C:/Users/15949/Desktop/Obesity/datastep/PROJ3_datastep.lst")
print("Creating new variable: SII.Q4")
SII.Q4<- rankvar(SII,4)
EmpowerStatsR<-cbind(EmpowerStatsR,SII.Q4)
```

```

rm(SII.Q4)
detach(EmpowerStatsR)
sink()
vname<-c("_N_", "_STAT_", "_TOTAL_", "SEQN", "GENDER", "GENDER.1", "GENDER.2")
vname<-c(vname, "AGE", "RACE", "RACE.1", "RACE.2", "RACE.3", "RACE.4")
vlabel<-c(vlabel, "AGE", "RACE", " 1", " 2", " 3", " 4")
vname<-
c(vname, "EDUCATION.LEVEL", "EDUCATION.LEVEL.1", "EDUCATION.LEVEL.2", "EDUCATION.LEVEL.3")
vlabel<-c(vlabel, "EDUCATION.LEVEL", " 1", " 2", " 3")
vname<-
c(vname, "MARITAL.STATUS", "MARITAL.STATUS.1", "MARITAL.STATUS.2", "MARITAL.STATUS.3")
vlabel<-c(vlabel, "MARITAL.STATUS", " 1", " 2", " 3")
vname<-c(vname, "WTMECPRP", "RATIO.OF.FAMILY.INCOME.TO.POVERTY")
vlabel<-c(vlabel, "WTMECPRP", "RATIO.OF.FAMILY.INCOME.TO.POVERTY")
vname<-
c(vname, "PIR", "PIR.1", "PIR.2", "PIR.3", "LYMPHOCYTE.NUMBER..1000.CELLS.UL.")
vlabel<-c(vlabel, "PIR", " 1", " 2", " 3", "LYMPHOCYTE.NUMBER..1000.CELLS.UL.")
vname<-
c(vname, "NEUTROPHILS.NUM..1000.CELL.UL.", "PLATELET.COUNT..1000.CELLS.UL.")
vlabel<-
c(vlabel, "NEUTROPHILS.NUM..1000.CELL.UL.", "PLATELET.COUNT..1000.CELLS.UL.")
vname<-c(vname, "SII", "LGSII", "SMOKE", "SMOKE.1", "SMOKE.2", "SMOKE.3")
vlabel<-c(vlabel, "SII", "LGSII", "SMOKE", " 1", " 2", " 3")
vname<-c(vname, "SLEEP.DISORDER", "SLEEP.DISORDER.1", "SLEEP.DISORDER.2")
vlabel<-c(vlabel, "SLEEP.DISORDER", " 1", " 2")
vname<-
c(vname, "VIGOROUS.RECREATIONAL.ACTIVITIES", "VIGOROUS.RECREATIONAL.ACTIVITIES.1", "VIGOROUS.RECREATIONAL.ACTIVITIES.2")
vlabel<-c(vlabel, "VIGOROUS.RECREATIONAL.ACTIVITIES", " 1", " 2")
vname<-
c(vname, "DAYS.VIGOROUS.RECREATIONAL.ACTIVITIES", "DAYS.VIGOROUS.RECREATIONAL.ACTIVITIES.1", "DAYS.VIGOROUS.RECREATIONAL.ACTIVITIES.2", "DAYS.VIGOROUS.RECREATIONAL.ACTIVITIES.3", "DAYS.VIGOROUS.RECREATIONAL.ACTIVITIES.4", "DAYS.VIGOROUS.RECREATIONAL.ACTIVITIES.5", "DAYS.VIGOROUS.RECREATIONAL.ACTIVITIES.6", "DAYS.VIGOROUS.RECREATIONAL.ACTIVITIES.7")
vlabel<-c(vlabel, "DAYS.VIGOROUS.RECREATIONAL.ACTIVITIES", " 1", " 2", " 3", " 4", " 5", " 6", " 7")
vname<-c(vname, "MINUTES.VIGOROUS.RECREATIONAL.ACTIVITIES")
vlabel<-c(vlabel, "MINUTES.VIGOROUS.RECREATIONAL.ACTIVITIES")
vname<-
c(vname, "MODERATE.RECREATIONAL.ACTIVITIES", "MODERATE.RECREATIONAL.ACTIVITIES.1", "MODERATE.RECREATIONAL.ACTIVITIES.2")

```

```

vlabel<-c(vlabel,"MODERATE.RECREATIONAL.ACTIVITIES"," 1"," 2")
vname<-
c(vname,"DAYS.MODERATE.RECREATIONAL.ACTIVITIES","DAYS.MODERATE.RECRE
ATIONAL.ACTIVITIES.1","DAYS.MODERATE.RECREATIONAL.ACTIVITIES.2","DAYS.M
ODERATE.RECREATIONAL.ACTIVITIES.3","DAYS.MODERATE.RECREATIONAL.ACTIV
ITIES.4","DAYS.MODERATE.RECREATIONAL.ACTIVITIES.5","DAYS.MODERATE.RECR
EATIONAL.ACTIVITIES.6","DAYS.MODERATE.RECREATIONAL.ACTIVITIES.7","DAYS.
MODERATE.RECREATIONAL.ACTIVITIES.99")
vlabel<-c(vlabel,"DAYS.MODERATE.RECREATIONAL.ACTIVITIES"," 1"," 2"," 3","
4"," 5"," 6"," 7"," 99")
vname<-c(vname,"MINUTES.MODERATE.RECREATIONAL.ACTIVITIES")
vlabel<-c(vlabel,"MINUTES.MODERATE.RECREATIONAL.ACTIVITIES")
vname<-c(vname,"ACTIVITY","ACTIVITY.1","ACTIVITY.2","ACTIVITY.3")
vlabel<-c(vlabel,"ACTIVITY"," 1"," 2"," 3")
vname<-c(vname,"DRINK","DRINK.1","DRINK.2","BODY.MASS.INDEX..KG.M..2.")
vlabel<-c(vlabel,"DRINK"," 1"," 2","BODY.MASS.INDEX..KG.M..2.")
vname<-c(vname,"WAIST.CIRCUMFERENCE..CM.,"ENERGY..KCAL.")
vlabel<-c(vlabel,"WAIST.CIRCUMFERENCE..CM.,"ENERGY..KCAL.")
vname<-c(vname,"OBESITY","OBESITY.1","OBESITY.2","ENERGY..1000KCAL.")
vlabel<-c(vlabel,"OBESITY"," 1"," 2","ENERGY..1000KCAL.")
vname<-c(vname,"SII.Q4","SII.Q4.0","SII.Q4.1","SII.Q4.2","SII.Q4.3")
slt.vname<-c()

```

```

library(weights,lib.loc=R.LibLocation)
library(Hmisc,lib.loc=R.LibLocation)

```

```

ofname<-"PROJ3_1_tbl1";
WD<-EmpowerStatsR; wd.subset="";
svy.DSN.YN <- FALSE;
weights<-WD$WTMECPRP;weights.var <- 'wtmecprp';
WD<-cbind(WD,weights); WD<-WD[!is.na(weights),];
attach(WD)
subjvname<-NA;
xv<-
cbind(GENDER,AGE,RACE,EDUCATION.LEVEL,MARITAL.STATUS,PIR,SII,SMOKE,SLEE
P.DISORDER,ACTIVITY,DRINK,WAIST.CIRCUMFERENCE..CM.,OBESITY,ENERGY..1000
KCAL.,BODY.MASS.INDEX..KG.M..2.);
xvname<-
c('GENDER','AGE','RACE','EDUCATION.LEVEL','MARITAL.STATUS','PIR','SII','SMOKE','SL
EEP.DISORDER','ACTIVITY','DRINK','WAIST.CIRCUMFERENCE..CM.','OBESITY','ENERG
Y..1000KCAL.','BODY.MASS.INDEX..KG.M..2.');
```

```

xvar<-
c('GENDER','AGE','RACE','EDUCATION_LEVEL','MARITAL_STATUS','PIR','SII','SMOKE','S
LEEP_DISORDER','ACTIVITY','DRINK','WAIST_CIRCUMFERENCE__CM_','OBESITY','EN

```

```

ERGY_1000KCAL_',BODY_MASS_INDEX_KG_M_2_');
xlv<-c(2,0,4,3,3,3,0,3,2,3,2,0,2,0,0);
sxf<-NA;
svname<-NA; sv<-NA; slv<-NA;
av<-NA; avname<-NA; avlbl<-NA; nadj<-0; alv<-NA;
timev<-NA; timevname<-NA;
bv<-SII.Q4;bvar<- "SII.Q4";bvname<- "SII_Q4";
colv<-NA; colvname<-NA;
v.start<-NA; vname.start<-NA;
v.stop<-NA; vname.stop<-NA;
par1<-NA;dec<-2;parm<-c(NA, NA, 1,NA, 0);
if (!exists("pdfwd")) pdfwd<-6;
if (!exists("pdfht")) pdfht<-6;
##R package## weights Hmisc ##R package##;
mat2htmltable<-function(mat) {
  t1<- apply(mat,1,function(z) paste(z,collapse="</td><td>"))
  t2<- paste("<tr><td>",t1,"</td></tr>")
  return(paste(t2,collapse=" "))
}
pvformat<-function(p,dec) {
  pp <- sprintf(paste("%.",dec,"f",sep=""),as.numeric(p))
  if (is.matrix(p)) {pp<-matrix(pp, nrow=nrow(p)); colnames(pp)<-colnames(p);rownames(pp)<-
rownames(p);}
  lw <- paste("<",substr("0.0000000000",1,dec+1),"1",sep="");
  pp[as.numeric(p)<(1/10^dec)]<-lw
  return(pp)
}
numfmt<-function(p,dec) {
  if (is.list(p)) p<-as.matrix(p)
  pp <- sprintf(paste("%.",dec,"f",sep=""),as.numeric(p))
  if (is.matrix(p)) {pp<-matrix(pp, nrow=nrow(p));colnames(pp)<-colnames(p);rownames(pp)<-
rownames(p);}
  pp[as.numeric(p)>10000000]<- "inf."
  pp[is.na(p) | gsub(" ",",",p)==""]<- ""
  pp[p=="-Inf"]<-"-Inf"
  pp[p=="Inf"]<- "Inf"
  return(pp)
}
lmp <- function (mdl, dec) {
  p <- NA
  if (class(mdl) == "lm") {f <- summary(mdl)$fstatistic; p <-
pvformat(pf(f[1],f[2],f[3],lower.tail=F),dec); }
  return(p);
}

```

```

vlabelN<- (substr(vlabel,1,1)==" ");
vlabelZ<-vlabel[vlabelN];vlabelV<-vlabel[!vlabelN]
vnameV<-vname[!vlabelN];vnameZ<-vname[vlabelN];
w<-c("<html><head>","<meta http-equiv=\"Content-Type\" content=\"text/html\"
charset=\"gb2312\" /></head><body>")
w<-c(w,paste("<h2>", title, "</h2>"))
allvname<-c(xvname,bvar,colvname,"weights"); allvname<-allvname[!is.na(allvname)];
WD<-data.frame(WD,TOT_=1)[,c(allvname,"TOT_")];
rm(xv,bv,colv)
decp <- max(dec+2,4);

if (is.na(colvname)) {
  nclv<-1; clvb<-"Total"; clvb_ <-"Total"
} else {
  clv<-levels(factor(WD[,colvname])); nclv<-length(clv)+1
  clvb_ <-vlabelZ[match(paste(colvname, ".",clv,sep=""),vnameZ)];
  clvb_[is.na(clvb_)]<-clv[is.na(clvb_)];
  clvb_<-c(paste(vlabelV[vnameV==colvname],clvb_,sep=""),"Total");
  clvb_<-c(clvb_,"Total")
  WD<-WD[!is.na(WD[,colvname]),]
}

if (is.na(bvar)) {ncc<-1; tt00<-"";
} else {
  bvb<-vlabelV[vnameV==bvar];
  blv<-levels(factor(WD[,bvar])); ncc<-length(blv);
  blvb_ <-vlabelZ[match(paste(bvar, ".",blv,sep=""),vnameZ)];
  blvb_[is.na(blvb_)]<-blv[is.na(blvb_)];
  tt00<-c(blvb_,"P-value","P-value*")
  WD<-WD[!is.na(WD[,bvar]),];
}

xv0<-xvname[xlv==0]; xv1<-xvname[xlv>0]; nxv0<-sum(xlv==0); nxv1<-sum(xlv>0);
xv0b<-vlabelV[match(xv0,vnameV)]; xv0b[is.na(xv0b)]<-xv0[is.na(xv0b)]
xv1b<-vlabelV[match(xv1,vnameV)]; xv1b[is.na(xv1b)]<-xv1[is.na(xv1b)]

for (k in 1:nclv) {
  if (!is.na(colvname) & k<nclv) {WD1<-WD[WD[,colvname]==clv[k],]; } else {WD1<-WD;}
  if (!is.na(bvar)) {
    tt <- c("", blvb_, "P value");
    if (ncc==2) tt <- c("", blvb_, "Standardize diff.", "P value");
    if (nxv0>0) {
      tt0 <- c("",xv0b);

```



```

meanxx<-matrix(NA, nrow=nxv0, ncol=ncc);
stdxx <-matrix(NA, nrow=nxv0, ncol=ncc);
nnxx <-matrix(NA, nrow=nxv0, ncol=ncc);
for (i in (1:ncc)) {
  coli <- blvb_[i];
  WD2 <- WD1[WD1[,bvar]== blv[i,]
  for (j in (1:nxv0)) {
    meani <- wtd.mean(WD2[,xv0[j]], WD2$weights, na.rm=TRUE)
    stdi <- sqrt(wtd.var(WD2[,xv0[j]], WD2$weights, na.rm=TRUE))
    coli <- c(coli, paste(numfmt(meani,dec)," &#177 ", numfmt(stdi,dec), sep=""))
    meanxx[j,i]<-meani; stdxx[j,i]<-stdi
    nnxx[j,i] <- sum(WD2$weights, na.rm=TRUE)
  }
  tt0 <- cbind(tt0, coli);
}
if (ncc==2) {
  st.diff<-""
  for (j in 1:nxv0) {
    stddiff <- abs(meanxx[j,2] - meanxx[j,1])/sqrt((stdxx[j,2]^2 + stdxx[j,1]^2)/2)
    se <- sqrt((nnxx[j,1]+nnxx[j,2])/nnxx[j,1]/nnxx[j,2] +
stddiff^2/(2*(nnxx[j,1]+nnxx[j,2])))
    stddiff.l <- stddiff - 1.96 * se
    stddiff.u <- stddiff + 1.96 * se
    vi.stdiff<-paste(numfmt(stddiff,3), " (", numfmt(stddiff.l,3), ", ", numfmt(stddiff.u,3),
)", sep="")
    st.diff<-c(st.diff,vi.stdiff)
  }
  tt0 <- cbind(tt0, st.diff)
}
colp <- "P-value";
for (j in 1:nxv0) {
  mdl<- lm(WD1[,xv0[j]]~factor(WD1[,bvar]), weights=WD1$weights, data=WD1)
  colp <- c(colp, lmp(mdl, decp))
}
tt0 <-cbind(tt0,colp);
tt <- rbind(tt, tt0[-1,])
}
if (nxv1>0) {
  tt1 <- c("", blvb_, "P value");
  if (ncc==2) tt1 <- c("", blvb_, "Standardize diff.", "P value");
  for (j in (1:nxv1)) {
    vlv<-levels(factor(WD1[,xv1[j]]));
    vlvb_ <-vlabelZ[match(paste(xv1[j],".",vlv,sep=""),vnameZ)];
    vlvb_[is.na(vlvb_)]<-vlv[is.na(vlvb_)];

```

```

colxj <- c(xv1b[j],v1vb_);
z <- NULL; sumw <- NULL
for (i in (1:ncc)) {
  WD2 <- WD1[WD1[,bvar]== blv[i,]
  freqi <- wpct(WD2[,xv1[j]],weight=WD2$weights,na.rm=TRUE)
  ffi <- freqi[match(vlv, names(freqi))]
  z <- cbind(z, ffi)
  ffi <- c("", numfmt(freqi*100,dec))
  colxj <- cbind(colxj, ffi)
  sumw <- c(sumw, sum(WD2$weights,na.rm=TRUE))
}
if (ncc==2) {
  stddiff <- abs(z[,1]-z[,2])/sqrt((z[,1]*(1-z[,1])+z[,2]*(1-z[,2]))/2)
  se <- sqrt((sumw[1]+sumw[2])/sumw[1]/sumw[2] + stddiff^2/(2*(sumw[1]+sumw[2])))
  stddiff.l <- stddiff - 1.96 * se
  stddiff.u <- stddiff + 1.96 * se
  vi.stdiff <- paste(numfmt(stddiff,3), " (", numfmt(stddiff.l,3), ", ", numfmt(stddiff.u,3),
)", sep="")
  colxj <- cbind(colxj, c("", vi.stdiff))
}
chi <- wtd.chi.sq(WD1[,xv1[j]],WD1[,bvar],weight=WD1$weights,na.rm=TRUE)
pv <- chi["p.value"];
colp <- c(pvformat(pv,dec), rep("",times=length(vlv)))
colxj <- cbind(colxj, colp)
tt1 <- rbind(tt1, colxj)
}
tt <- rbind(tt, tt1[-1,])
}

} else {

tt <- c("", "Statistics");
if (nxv0>0) {
  tt0 <- c("",xv0b);
  colxx = "";
  for (j in (1:nxv0)) {
    meani <- wtd.mean(WD1[,xv0[j]], WD1$weights, na.rm=TRUE)
    stdi <- sqrt(wtd.var(WD1[,xv0[j]], WD1$weights, na.rm=TRUE))
    colxx <- c(colxx, paste(numfmt(meani,dec), " &#177 ", numfmt(stdi,dec), sep=""))
  }
  tt0 <- cbind(tt0,colxx)
  tt <- rbind(tt, tt0[-1,])
}
if (nxv1>0) {

```

```

tt1 <- c("", "%");
for (j in (1:nxv1)) {
  vlv<-levels(factor(WD1[,xv1[j]]));
  vlvb_<-vlabelZ[match(paste(xv1[j],".",vlv,sep=""),vnameZ)];
  vlvb_[is.na(vlvb_)]<-vlv[is.na(vlvb_)];
  colxj <- c(xv1b[j],vlvb_);
  freqi <- wpct(WD1[,xv1[j]],weight=WD1$weights,na.rm=TRUE)
  ffi <- freqi[match(vlv,names(freqi))]
  ffi <- c("",numfmt(freqi*100,dec))
  colxj <-cbind(colxj, ffi)
  tt1 <- rbind(tt1, colxj)
}
tt <- rbind(tt, tt1[-1,])
}

}
if (!is.na(colvname)) w<-c(w,"<br>",clvb[k])
w<-c(w,"<br><table border=3>", mat2htmltable(tt), "</table>")
}

if (nxv0>0) {
  w<-c(w,"<br>Mean +/- SD for: ", paste(xv0b,sep="; "))
  if (!is.na(bvar)) w<-c(w, ". P value was calculated by weighted linear regression model.");
}
if (nxv1>0) {
  w<-c(w,"<br> % for: ", paste(xv1b,sep="; "))
  if (!is.na(bvar)) w<-c(w, ". P value was calculated by weighted chi-square test.");
}
w<-c(w,paste("<br>Created by EmpowerStats (www.empowerstats.com) and R on",Sys.Date()))
w<-c(w,wd.subset)
w<-c(w,"</body></html>")
fileConn<-file(paste(ofname,".htm",sep="")); writeLines(w, fileConn)

```

```

R.Version4RUN<-343;
R.LibLocation <- "C:/Users/15949/AppData/Roaming/EmpowerRCH/R343/library"
***** Regarding ALL Following R Functions *****
***** COPYRIGHT (c) 2010 X&Y Solutions, ALL RIGHT RESERVED *****
***** www.EmpowerStats.com *****
*****
Sys.setlocale("LC_TIME", "C")
library(doBy,lib.loc=R.LibLocation)

```

```

library(plotrix,lib.loc=R.LibLocation)
library(stringi,lib.loc=R.LibLocation)
library(stringr,lib.loc=R.LibLocation)
library(survival,lib.loc=R.LibLocation)
library(rms,lib.loc=R.LibLocation)
library(nnet,lib.loc=R.LibLocation)
library(car,lib.loc=R.LibLocation)
library(mgcv,lib.loc=R.LibLocation)
pdfwd<-6; pdfht<-6
setwd("C:/Users/15949/Desktop/Obesity/PROJ3_2_tb11")
load("C:/Users/15949/Desktop/Obesity/SIIobesityAA.Rdata")
if (length(which(Is()=="EmpowerStatsR"))==0) EmpowerStatsR<-get(Is()[1])
names(EmpowerStatsR)<-toupper(names(EmpowerStatsR))

```

```

rankvar <- function(var, num) {
  qprobs <- 1/num
  if (num>2) {for (i in (2:(num-1))) {qprobs <- c(qprobs, 1/num * i) }}
  outvar <- rep(0, times=length(var))
  outvar[is.na(var)] <- NA
  cutpoints <- quantile(var,probs=qprobs, na.rm=TRUE)
  for (k in (1:length(cutpoints))) {outvar[var>=cutpoints[k]] <- k}
  tmp<-c(min(var,na.rm=TRUE),cutpoints,max(var,na.rm=TRUE))
  names(tmp)<-c("Min",names(cutpoints),"Max")
  print(tmp)
  return(outvar)
}

```

```

attach(EmpowerStatsR)
sink("C:/Users/15949/Desktop/Obesity/datastep/PROJ3_datastep.lst")
print("Creating new variable: SII.Q4")
SII.Q4<- rankvar(SII,4)
EmpowerStatsR<-cbind(EmpowerStatsR,SII.Q4)
rm(SII.Q4)
detach(EmpowerStatsR)
sink()
vname<-c("_N_", "_STAT_", "_TOTAL_", "SEQN", "GENDER", "GENDER.1", "GENDER.2")
vname<-c(vname, "AGE", "RACE", "RACE.1", "RACE.2", "RACE.3", "RACE.4")
vlabel<-c(vlabel, "AGE", "RACE", " 1", " 2", " 3", " 4")
vname<-
c(vname, "EDUCATION.LEVEL", "EDUCATION.LEVEL.1", "EDUCATION.LEVEL.2", "EDUCATION.LEVEL.3")
vlabel<-c(vlabel, "EDUCATION.LEVEL", " 1", " 2", " 3")

```

```

vname<-
c(vname,"MARITAL.STATUS","MARITAL.STATUS.1","MARITAL.STATUS.2","MARITAL.S
TATUS.3")
vlabel<-c(vlabel,"MARITAL.STATUS"," 1"," 2"," 3")
vname<-c(vname,"WTMECPRP","RATIO.OF.FAMILY.INCOME.TO.POVERTY")
vlabel<-c(vlabel,"WTMECPRP","RATIO.OF.FAMILY.INCOME.TO.POVERTY")
vname<-
c(vname,"PIR","PIR.1","PIR.2","PIR.3","LYMPHOCYTE.NUMBER..1000.CELLS.UL.")
vlabel<-c(vlabel,"PIR"," 1"," 2"," 3","LYMPHOCYTE.NUMBER..1000.CELLS.UL.")
vname<-
c(vname,"NEUTROPHILS.NUM..1000.CELL.UL.,""PLATELET.COUNT..1000.CELLS.UL.")
vlabel<-
c(vlabel,"NEUTROPHILS.NUM..1000.CELL.UL.,""PLATELET.COUNT..1000.CELLS.UL.")
vname<-c(vname,"SII","LGSII","SMOKE","SMOKE.1","SMOKE.2","SMOKE.3")
vlabel<-c(vlabel,"SII","LGSII","SMOKE"," 1"," 2"," 3")
vname<-c(vname,"SLEEP.DISORDER","SLEEP.DISORDER.1","SLEEP.DISORDER.2")
vlabel<-c(vlabel,"SLEEP.DISORDER"," 1"," 2")
vname<-
c(vname,"VIGOROUS.RECREATIONAL.ACTIVITIES","VIGOROUS.RECREATIONAL.ACTI
VITIES.1","VIGOROUS.RECREATIONAL.ACTIVITIES.2")
vlabel<-c(vlabel,"VIGOROUS.RECREATIONAL.ACTIVITIES"," 1"," 2")
vname<-
c(vname,"DAYS.VIGOROUS.RECREATIONAL.ACTIVITIES","DAYS.VIGOROUS.RECREAT
IONAL.ACTIVITIES.1","DAYS.VIGOROUS.RECREATIONAL.ACTIVITIES.2","DAYS.VIGO
ROUS.RECREATIONAL.ACTIVITIES.3","DAYS.VIGOROUS.RECREATIONAL.ACTIVITIE
S.4","DAYS.VIGOROUS.RECREATIONAL.ACTIVITIES.5","DAYS.VIGOROUS.RECREATI
ONAL.ACTIVITIES.6","DAYS.VIGOROUS.RECREATIONAL.ACTIVITIES.7")
vlabel<-c(vlabel,"DAYS.VIGOROUS.RECREATIONAL.ACTIVITIES"," 1"," 2"," 3","
4"," 5"," 6"," 7")
vname<-c(vname,"MINUTES.VIGOROUS.RECREATIONAL.ACTIVITIES")
vlabel<-c(vlabel,"MINUTES.VIGOROUS.RECREATIONAL.ACTIVITIES")
vname<-
c(vname,"MODERATE.RECREATIONAL.ACTIVITIES","MODERATE.RECREATIONAL.AC
TIVITIES.1","MODERATE.RECREATIONAL.ACTIVITIES.2")
vlabel<-c(vlabel,"MODERATE.RECREATIONAL.ACTIVITIES"," 1"," 2")
vname<-
c(vname,"DAYS.MODERATE.RECREATIONAL.ACTIVITIES","DAYS.MODERATE.RECRE
ATIONAL.ACTIVITIES.1","DAYS.MODERATE.RECREATIONAL.ACTIVITIES.2","DAYS.M
ODERATE.RECREATIONAL.ACTIVITIES.3","DAYS.MODERATE.RECREATIONAL.ACTIV
ITIES.4","DAYS.MODERATE.RECREATIONAL.ACTIVITIES.5","DAYS.MODERATE.RECR
EATIONAL.ACTIVITIES.6","DAYS.MODERATE.RECREATIONAL.ACTIVITIES.7","DAYS.
MODERATE.RECREATIONAL.ACTIVITIES.99")
vlabel<-c(vlabel,"DAYS.MODERATE.RECREATIONAL.ACTIVITIES"," 1"," 2"," 3","
4"," 5"," 6"," 7"," 99")

```

```

vname<-c(vname,"MINUTES.MODERATE.RECREATIONAL.ACTIVITIES")
vlabel<-c(vlabel,"MINUTES.MODERATE.RECREATIONAL.ACTIVITIES")
vname<-c(vname,"ACTIVITY","ACTIVITY.1","ACTIVITY.2","ACTIVITY.3")
vlabel<-c(vlabel,"ACTIVITY"," 1"," 2"," 3")
vname<-c(vname,"DRINK","DRINK.1","DRINK.2","BODY.MASS.INDEX..KG.M..2.")
vlabel<-c(vlabel,"DRINK"," 1"," 2","BODY.MASS.INDEX..KG.M..2.")
vname<-c(vname,"WAIST.CIRCUMFERENCE..CM.,""ENERGY..KCAL.")
vlabel<-c(vlabel,"WAIST.CIRCUMFERENCE..CM.,""ENERGY..KCAL.")
vname<-c(vname,"OBESITY","OBESITY.1","OBESITY.2","ENERGY..1000KCAL.")
vlabel<-c(vlabel,"OBESITY"," 1"," 2","ENERGY..1000KCAL.")
vname<-c(vname,"SII.Q4","SII.Q4.0","SII.Q4.1","SII.Q4.2","SII.Q4.3")
slt.vname<-c()

library(gdata,lib.loc=R.LibLocation)
library(geepack,lib.loc=R.LibLocation)
library(mgcv,lib.loc=R.LibLocation)

ofname<-"PROJ3_2_tbl1";
WD<-EmpowerStatsR; wd.subset="";
svy.DSN.YN <- FALSE;
weights<-WD$WTMECPRP;weights.var <- 'wtmecprp';
WD<-cbind(WD,weights); WD<-WD[!is.na(weights),];
attach(WD)
subjvname<-NA;
yv<-cbind(BODY.MASS.INDEX..KG.M..2.);
yvname<-c('BODY.MASS.INDEX..KG.M..2.');
```

```

sdf<-c(NA,0,0,0,0,0,0,0,0,0,0,0,0,0,0,0)[-1];
slv<-c(2,0,4,3,3,3,3,2,3,2,0);
av<-cbind(GENDER,AGE,RACE);
avname<-c('GENDER','AGE','RACE');
if (!is.na(avname[1])) avlbl<-vlabel[match(avname, vname)];
nadj<-length(avname);alv<-c(2,0,4);
saf<-c(NA,0,0,0)[-1];
timev<-NA; timevname<-NA;
bv<-NA; bvar<-NA;
colv<-NA; colvname<-NA;
v.start<-NA; vname.start<-NA;
v.stop<-NA; vname.stop<-NA;
par1<-1;dec<-2;parm<-c(1,NA, 1,1, 0);
if (!exists("pdfwd")) pdfwd<-6;
if (!exists("pdfht")) pdfht<-6;
##R package## gdata geepack mgcv ##R package##;
pvformat<-function(p,dec) {
  pp <- sprintf(paste("%.",dec,"f",sep=""),as.numeric(p))
  if (is.matrix(p)) {pp<-matrix(pp, nrow=nrow(p)); colnames(pp)<-colnames(p);rownames(pp)<-
rownames(p);}
  lw <- paste("<",substr("0.00000000000",1,dec+1),"1",sep="");
  pp[as.numeric(p)<(1/10^dec)]<-lw
  return(pp)
}
numfmt<-function(p,dec) {
  if (is.list(p)) p<-as.matrix(p)
  pp <- sprintf(paste("%.",dec,"f",sep=""),as.numeric(p))
  if (is.matrix(p)) {pp<-matrix(pp, nrow=nrow(p));colnames(pp)<-colnames(p);rownames(pp)<-
rownames(p);}
  pp[as.numeric(p)>10000000]<- "inf."
  pp[is.na(p) | gsub(" ","",p)==""]<- ""
  pp[p=="-Inf"]<-"-Inf"
  pp[p=="Inf"]<- "Inf"
  return(pp)
}
varstats<-function(var,vlvl,dec) {
  if (length(vlvl)==1 & vlvl[1]==0) {
return(paste(numfmt(mean(var,na.rm=TRUE),dec),numfmt(sd(var,na.rm=TRUE),dec),sep="+"))
  } else {
  a<-table(var)
  b<-matrix(paste(a, " (", numfmt(a/sum(a)*100,dec), "%)",sep=""),ncol=1)
  return(c(" ",b[match(vlvl,names(a))]))
}

```

```

    }
  }
mat2htmltable<-function(mat) {
  t1<- apply(mat,1,function(z) paste(z,collapse="</td><td>"))
  t2<- paste("<tr><td>",t1,"</td></tr>")
  return(paste(t2,collapse=" "))
}
setgam<-function(fml,yi) {
  if (ydist[yi]== "") ydist[yi]<-"gaussian"
  if (ydist[yi]=="exact") ydist[yi]<-"binomial"
  if (ydist[yi]=="breslow") ydist[yi]<-"binomial"
  if (ydist[yi]=="gaussian") mdl<-try(gam(formula(fml),weights=wdtmp$weights,data=wdtmp,
family=gaussian(link="identity")))
  if (ydist[yi]=="binomial") mdl<-try(gam(formula(fml),weights=wdtmp$weights,data=wdtmp,
family=binomial(link="logit")))
  if (ydist[yi]=="poisson") mdl<-try(gam(formula(fml),weights=wdtmp$weights,data=wdtmp,
family=poisson(link="log")))
  if (ydist[yi]=="gamma") mdl<-try(gam(formula(fml),weights=wdtmp$weights,data=wdtmp,
family=Gamma(link="inverse")))
  if (ydist[yi]=="negbin") mdl<-try(gam(formula(fml),weights=wdtmp$weights,data=wdtmp,
family=negbin(c(1,10), link="log")))
  return(mdl)
}
setgee<-function(fml,yi) {
  if (ydist[yi]== "") ydist[yi]<-"gaussian"
  if (ydist[yi]=="exact") ydist[yi]<-"binomial"
  if (ydist[yi]=="breslow") ydist[yi]<-"binomial"
  if
      (ydist[yi]=="gaussian")
      md<-
try(geeglm(formula(fml),id=wdtmp[,subjvname],corstr=gee.TYPE,family="gaussian",weights=w
dtmp$weights,data=wdtmp))
  if
      (ydist[yi]=="binomial")
      md<-
try(geeglm(formula(fml),id=wdtmp[,subjvname],corstr=gee.TYPE,family="binomial",weights=w
dtmp$weights,data=wdtmp))
  if
      (ydist[yi]=="poisson")
      md<-
try(geeglm(formula(fml),id=wdtmp[,subjvname],corstr=gee.TYPE,family="poisson",weights=wd
tmp$weights,data=wdtmp))
  if
      (ydist[yi]=="gamma")
      md<-
try(geeglm(formula(fml),id=wdtmp[,subjvname],corstr=gee.TYPE,family="Gamma",weights=wd
tmp$weights,data=wdtmp))
  if
      (ydist[yi]=="negbin")
      md<-
try(geeglm.nb(formula(fml),id=wdtmp[,subjvname],corstr=gee.TYPE,weights=wdtmp$weights,da
ta=wdtmp))
  return(md)
}

```



```

setglm<-function(fml,yi) {
  if (ydist[yi]== "") ydist[yi]<-"gaussian"
  if (ydist[yi]=="exact") ydist[yi]<-"binomial"
  if (ydist[yi]=="breslow") ydist[yi]<-"binomial"
  if
      (ydist[yi]=="gaussian")
      md<-
try(glm(formula(fml),family="gaussian",weights=wdtmp$weights,data=wdtmp))
  if
      (ydist[yi]=="binomial")
      md<-
try(glm(formula(fml),family="binomial",weights=wdtmp$weights,data=wdtmp))
  if
      (ydist[yi]=="poisson")
      md<-
try(glm(formula(fml),family="poisson",weights=wdtmp$weights,data=wdtmp))
  if
      (ydist[yi]=="gamma")
      md<-
try(glm(formula(fml),family="Gamma",weights=wdtmp$weights,data=wdtmp))
  if (ydist[yi]=="negbin") md<-try(glm.nb(formula(fml),weights=wdtmp$weights,data=wdtmp))
  return(md)
}

mdl2oo<-function(mdl, xxname, opt) {
  if (is.na(mdl[[1]][1])) return(list(rep("",times=length(xxname)), ""))
  if (substr(mdl[[1]][1],1,5)=="Error") return(list(rep("",times=length(xxname)), ""))
  gs<-summary(mdl); print(mdl$formula); print(gs)
  if (opt=="gam") {gsparm <- gs$p.table;tmpn<-gs$n;
  } else {gsparm <- gs$coefficients;tmpn <- sum(gs$df[c(1,2)]);}
  gsp<-gsparm[match(xxname,rownames(gsparm)),]
  if (length(xxname)==1) {beta<-gsp[1]; se<-gsp[2]; pv<-gsp[4];
  } else {beta<-gsp[,1]; se<-gsp[,2]; pv<-gsp[,4]; }
  ci1<- beta-1.96*se; ci2<- beta+1.96*se
  pvx<-substr(rep("****",length(pv)),1,(pv<=0.05)+(pv<=0.01)+(pv<=0.001))
  if (colprn==3) {pvv<-pvx;} else {pvv<-pvformat(pv,dec+2);}
  if ((colprn!=2) & (gs$family[[2]]=="log" | gs$family[[2]]=="logit")) {
    o1<-paste(numfmt(exp(beta),dec)," (" ,numfmt(exp(ci1),dec),"
,numfmt(exp(ci2),dec),")",sep="")
  } else {
    if (colprn<3) {o1<-paste(numfmt(beta,dec), " (" ,numfmt(ci1,dec),"
,numfmt(ci2,dec),")",sep="")
  } else {o1<-paste(numfmt(beta,dec), "+",numfmt(se,dec),sep="");}
  }
  o1<-paste(o1,pvv); o1[is.na(beta)]<-NA
  if (length(xxname)>1) {
    if (gs$family[[2]]=="log" | gs$family[[2]]=="logit") {
      o1[is.na(o1) & substr(xxname,1,7)=="factor("<- "1.0"
    } else {o1[is.na(o1) & substr(xxname,1,7)=="factor("<- "0";}
    o1[is.na(o1)]<-"";
  }
  return(list(o1,tmpn))
}

```

```

recodevar <- function (var,oldcode,newcode) {
  tmp.v <- var
  nc.tmp <- length(oldcode)
  for (i in (1:nc.tmp)) {tmp.v[(var==oldcode[i])]=newcode[i]}
  if (is.factor(tmp.v)) {tmp.v1<-as.numeric(as.character(tmp.v))} else {tmp.v1<-
as.numeric(tmp.v)}
  rm(tmp.v); return(tmp.v1)
}
rankvar <- function(var, num) {
  qprobs <- 1/num
  if (num>2) {for (i in (2:(num-1))) {qprobs <- c(qprobs, 1/num * i) } }
  outvar <- rep(0, times=length(var))
  outvar[is.na(var)] <- NA
  cutpoints <- quantile(var,probs=qprobs, na.rm=TRUE)
  for (k in (1:length(cutpoints))) { outvar[var>=cutpoints[k]] <- k; }
  return(outvar)
}
removeNA<-function(i,j,m,wdf) {
  vvv<-c(yvname[i],adjvv[[m]],subjvname,colvname,bvar,vname.start,vname.stop,timevname);
  if (j<=nx) {vvv<-c(vvv,xvname[j]);} else {vvv<-c(vvv,xvname);}
  vvv<-vvv[!is.na(vvv)]; vvv<-vvv[vvv>" "]
  tmp<-is.na(wdf[,vvv]);
  return(wdf[apply(tmp,1,sum)==0,])
}
vlabelN<- (substr(vlabel,1,1)==" ");
vlabelZ<-vlabel[vlabelN];vlabelV<-vlabel[!vlabelN]
vnameV<-vname[!vlabelN];vnameZ<-vname[vlabelN]
w<-c("<html><head>","<meta http-equiv=\"Content-Type\" content=\"text/html\"
charset=\"gb2312\" /></head><body>")
if (!is.na(avname[1])) {
  if (sum((saf=="s" | saf=="S") & alv>0)>0) w<-c(w,"<br>Spline smoothing only applies for
continuous variables")
  if (!is.na(subjvname) & (sum((saf=="s" | saf=="S") & alv==0)>0)) w<-c(w,"<br>Generalized
estimate equation could not be used with spline smoothing terms")
}
if (!is.na(svname[1])) {
  if (sum((sdf=="s" | sdf=="S") & slv>0)>0) w<-c(w,"<br>Spline smoothing only applies for
continuous variables")
  if (!is.na(subjvname) & (sum((sdf=="s" | sdf=="S") & slv==0)>0)) w<-c(w,"<br>Generalized
estimate equation could not be used with spline smoothing terms")
}
allvname<-
c(yvname,xvname,colvname,bvar,avname,svname,subjvname,vname.start,vname.stop,timevname,
"weights");

```

```

allvname<-allvname[!is.na(allvname)]
WD<-WD[,allvname];
if (!is.na(subjvname)) WD<-WD[order(WD[,subjvname]),]
if (!is.na(sxf[1])) {
  if (sum(sxf>1 & xlv>0)>0) w<-c(w,"Categorizing only applies to continuous variables");
  if (sum(sxf>1 & xlv==0)>0) {
    t.xname<-NA;t.xlv<-NA; nx<-length(xvname)
    for (i in 1:nx) {
      if (sxf[i]>1 & xlv[i]==0) {
        tmp.Xi<- rankvar(WD[,xvname[i]],sxf[i])
        tmp.newcode <- tapply(WD[,xvname[i]],tmp.Xi,function(z) median(z,na.rm=TRUE))
        tmp.low <- tapply(WD[,xvname[i]],tmp.Xi,function(z) min(z,na.rm=TRUE))
        tmp.upp <- tapply(WD[,xvname[i]],tmp.Xi,function(z) max(z,na.rm=TRUE))
        tmp.Xi2<- recodevar(tmp.Xi,(1:sxf[i])-1,tmp.newcode)
        tmp.Xi<-cbind(tmp.Xi,tmp.Xi2)
        tmp.NM<-paste(xvname[i],c("grp","grp.cont"),sep=".")
        colnames(tmp.Xi)<-tmp.NM
        WD<-cbind(WD,tmp.Xi)
        t.xname<-c(t.xname,tmp.NM)
        t.xlv<-c(t.xlv,sxf[i],0)
        vnameV<-c(vnameV,tmp.NM)
        vlabelV<-c(vlabelV,paste(vlabelV[vnameV==xvname[i]],c("group","group trend")))
        vnameZ<-c(vnameZ,paste(tmp.NM[1],(1:sxf[i])-1,sep="."))
        vlabelZ<-c(vlabelZ,paste(tmp.low,"-",tmp.upp))
      } else {
        t.xname<-c(t.xname,xvname[i]); t.xlv<-c(t.xlv,xlv[i])
      }
    }
    xvname<-t.xname[-1]; xlv<-t.xlv[-1];
  }
}
rm(xv,yv,bv,av,sv,colv,v.start,v.stop)
if (!is.na(subjvname)) {
  if (!is.na(avname[1])) saf<-rep(0,length(saf));
  if (!is.na(svname[1])) sdf<-rep(0,length(sdf));
  WD<-WD[order(WD[,subjvname]),];
}
fmlm<-" "; fmlb<-"Non-adjusted"; tmp<-""; adjv<-list(NA); adjvb<-"None";
fmlp<-ifelse(!is.na(subjvname), "gee", "glm");
na=0; avb=""; smoothav<-0; nadjm<-0
if (!is.na(avname[1])) {
  na<-length(avname)
  avb<-vlabelV[match(avname,vnameV)];
  avname_ <- avname
}

```

```

smoothavi<-((saf=="s" | saf=="S") & alv==0)
smoothav<-sum(smoothavi)
smoothavname<-avname[smoothavi]
avname_[smoothavi]<-paste("s(",avname[smoothavi],")",sep="")
avb1<-avb
avb1[smoothavi]<-paste(avb[smoothavi],"(Smooth)",sep="")
avname_[alv>0]<-paste("factor(",avname[alv>0],")",sep="")
fmlm<-c(fmlm,paste("+",paste(avname_,collapse="+")))
fmlb<-c(fmlb,"Adjust")
nadjm<-nadjm+1; tmp<-c(tmp,"I"); adjvv[[nadjm+1]]<-avname;
adjvb<-c(adjvb, paste(avb1, collapse="; "))
fmlp<-c(fmlp,ifelse(!is.na(subjvname), "gee", ifelse(smoothav>0, "gam", "glm")))
}
ns=0; svb=""; smoothsv<-0
if (!is.na(svname[1])) {
  svb<-vlabelV[match(svname,vnameV)];
  svname_ <- svname
  smoothsvi<-((sdf=="s" | sdf=="S") & slv==0)
  smoothsv<-sum(smoothsvi)
  smoothsvname<-svname[smoothsvi]
  svname_[smoothsvi]<-paste("s(",svname[smoothsvi],")",sep="")
  svb1<-svb
  svb1[smoothsvi]<-paste(svb[smoothsvi],"(Smooth)",sep="")
  svname_[slv>0]<-paste("factor(",svname[slv>0],")",sep="")
  fmlm<-c(fmlm,paste("+",paste(svname_,collapse="+")))
  fmlb<-c(fmlb,"Adjust")
  nadjm<-nadjm+1; tmp<-c(tmp,"II"); adjvv[[nadjm+1]]<-svname
  adjvb<-c(adjvb, paste(svb1, collapse="; "))
  fmlp<-c(fmlp,ifelse(!is.na(subjvname), "gee", ifelse(smoothsv>0, "gam", "glm")))
}
if (is.na(parm[1]) & length(fmlm)>1) {
  fmlm<-fmlm[-1]; fmlb<-fmlb[-1]; tmp<-tmp[-1]; adjvv<-adjvv[-1]; adjvb<-adjvb[-1]; fmlp<-
  fmlp[-1];
}
if (nadjm>1) fmlb<-paste(fmlb,tmp)
nmdl<-length(fmlm)

ny=length(yvname); nx=length(xvname);
xb<-vlabelV[match(xvname,vnameV)]; xb[is.na(xb)]<-xvname[is.na(xb)]
yb<-vlabelV[match(yvname,vnameV)]; yb[is.na(yb)]<-yvname[is.na(yb)]
xvname_ <- xvname
xvname_[xlv>0]<-paste("factor(",xvname[xlv>0],")",sep="")
xxname_<-list(NA); xxlbl_<-list(NA); xxlvl_<-list(NA)
for (j in (1:nx)) {

```



```

}
aa<-c(1,2,3,4)
for (i in 1:4) {
  for (j in c(1:4)[-i]) {
    for (k in c(1:4)[-c(i,j)]) aa<-rbind(aa,c(i,j,k,c(1:4)[-c(i,j,k)]))
  }
}
if (is.na(parm[4])) parm[4]<-1
rord<-aa[parm[4],]
if (!is.na(bvar)) {prn<-"S";
} else {
  if (parm[4]>1) {
    rordc<-ifelse(rord[4]==1,3,4)
    prn<-c("G","Y","M","X")[rord[rordc]]
    if (prn=="X") {
      if (!contx & nx>1) prn<-ifelse(nmdl>1, "M", ifelse(ny>nx & contx, "X", "Y"))
      if (!contx & nx==1) prn<-"CX"
      if (par1==2) {tmp<-ifelse(rordc==4,ifelse(rord[3]==1,2,3),2); prn<-
c("G","Y","M","X")[rord[tmp]];}
    }
  } else {
    prn<-ifelse(nmdl>1, "M", ifelse(ny>nx & contx, "X", "Y"))
    if (par1==2) prn<-ifelse(nmdl>1, "M", "Y")
  }
  if (par1==3) prn<-"UM"
}
colprn<-parm[3];
sink(paste(ofname,".lst",sep=""))
if (par1==2) {xbgn<-nx+1; xend<-nx+1;} else {xbgn<-1; xend<-nx;}
if (prn=="Y") {
  tt<-c(0,0,0,0,"Exposure",yb); nn<-c(0,0,0,0,yb);
  for (k in (1:nclv)) {
    wdtmp0<-WD;
    if (!is.na(colvname)) {
      if (k<nclv) wdtmp0<-WD[WD[,colvname]==clv[k],];
      print(paste("Stratified by",colvname, ":", clvb[k]))
    }
  }
  for (m in 1:nmdl) {
    for (j in (xbgn:xend)) {
      colj<-cbind(k,0,m,j,xxlbl_[[j]])
      nnj <-c(k,0,m,j)
      for (i in (1:ny)) {
        fml<-paste(yvname[i],"~",xvname_[[j]],fmlm[m]);
        wdtmp<-removeNA(i,j,m,wdtmp0)

```

```

    if (!is.na(colvname)) {if (k==nclv) fml<-paste(fml,"+factor(",colvname,")",sep="");}
    if (fmlp[m]=="gam") tmp.mdl<-setgam(fml,i)
    if (fmlp[m]=="gee") tmp.mdl<-setgee(fml,i)
    if (fmlp[m]=="glm") tmp.mdl<-setglm(fml,i)
    tmp.poi<-mdl2oo(tmp.mdl,xxname_[[j]],fmlp[m])
    colj<-cbind(colj,tmp.poi[[1]]); nnj<-c(nnj,tmp.poi[[2]])
  }
  tt<-rbind(tt,colj); nn<-rbind(nn,nnj)
}
}
}
}
if (prn=="S") {
  tt<-c(0,0,0,0,"Exposure",blvb); nn<-c(0,0,0,0,blvb);
  for (k in (1:nclv)) {
    wdtmp0<-WD;
    if (!is.na(colvname)) {
      if (k<nclv) wdtmp0<-WD[WD[,colvname]==clv[k],];
      print(paste("Stratified by",colvname, ":", clvb[k]))
    }
    for (i in (1:ny)) {
      for (m in 1:nmdl) {
        for (j in (xbgn:xend)) {
          colj<-cbind(k,i,m,j,xxlbl_[[j]]);
          nnj <- c(k,i,m,j)
          for (b in (1:nblv)) {
            print(paste("Stratified by",bvar, ":", blvb[b]))
            fml<-paste(yvname[i],"~",xvname_[j],fmlm[m]);
            if (b<nblv) {
              wdtmp1<-wdtmp0[wdtmp0[,bvar]==blv[b],];
            } else {
              wdtmp1<-wdtmp0; fml<-paste(fml,"+factor(",bvar,")",sep="");
            }
            wdtmp<-removeNA(i,j,m,wdtmp1)
            if (!is.na(colvname)) {if (k==nclv) fml<-paste(fml,"+factor(",colvname,")",sep="");}
            if (fmlp[m]=="gam") tmp.mdl<-setgam(fml,i)
            if (fmlp[m]=="gee") tmp.mdl<-setgee(fml,i)
            if (fmlp[m]=="glm") tmp.mdl<-setglm(fml,i)
            tmp.poi<-mdl2oo(tmp.mdl,xxname_[[j]],fmlp[m])
            colj<-cbind(colj,tmp.poi[[1]]); nnj<-c(nnj,tmp.poi[[2]])
          }
          tt<-rbind(tt,colj); nn<-rbind(nn,nnj)
        }
      }
    }
  }
}

```

```

    }
  }
}
if (prn=="M") {
  tt<-c(0,0,0,0,"Exposure",fmlb); nn<-c(0,0,0,0,fmlb)
  for (k in (1:nclv)) {
    wdtmp0<-WD;
    if (!is.na(colvname)) {
      if (k<nclv) wdtmp0<-WD[WD[,colvname]==clv[k],];
      print(paste("Stratified by",colvname, ":", clvb[k]))
    }
    for (i in 1:ny) {
      for (j in xbg:nxend) {
        colj<-cbind(k,i,0,j,xxlbl_[[j]]); nnj<-c(k,i,0,j)
        for (m in 1:nmdl) {
          fml<-paste(yvname[i],"~",xvname_[j],fmlm[m]);
          wdtmp<-removeNA(i,j,m,wdtmp0)
          if (!is.na(colvname)) {if (k==nclv) fml<-paste(fml,"+factor(",colvname,")",sep="");}
          if (fmlp[m]=="gam") tmp.mdl<-setgam(fml,i)
          if (fmlp[m]=="gee") tmp.mdl<-setgee(fml,i)
          if (fmlp[m]=="glm") tmp.mdl<-setglm(fml,i)
          tmppooi<-mdl2oo(tmp.mdl,xxname_[[j]],fmlp[m])
          colj<-cbind(colj,tmppooi[[1]]); nnj<-c(nnj,tmppooi[[2]])
        }
        tt<-rbind(tt,colj); nn<-rbind(nn,nnj)
      }
    }
  }
}
if (prn=="X") {
  tt<-c(0,0,0,0,"Outcome",xb); nn<-c(0,0,0,0,xb);
  for (k in (1:nclv)) {
    wdtmp0<-WD;
    if (!is.na(colvname)) {
      if (k<nclv) wdtmp0<-WD[WD[,colvname]==clv[k],];
      print(paste("Stratified by",colvname, ":", clvb[k]))
    }
    for (m in 1:nmdl) {
      for (i in (1:ny)) {
        colj<-cbind(k,i,m,0,yb[i])
        nnj <-c(k,i,m,0)
        for (j in (1:nx)) {
          fml<-paste(yvname[i],"~",xvname_[j],fmlm[m]);
          wdtmp<-removeNA(i,j,m,wdtmp0)

```



```

    if (!is.na(colvname)) {if (k==nclv) fml<-paste(fml,"+factor(",colvname,")",sep="");}
    if (fmlp[m]=="gam") tmp.mdl<-setgam(fml,i)
    if (fmlp[m]=="gee") tmp.mdl<-setgee(fml,i)
    if (fmlp[m]=="glm") tmp.mdl<-setglm(fml,i)
    tmp.poi<-mdl2oo(tmp.mdl,xxname_[[j]],fmlp[m])
    colj<-cbind(colj,tmp.poi[[1]]); nnj<-c(nnj,tmp.poi[[2]])
  }
  tt<-rbind(tt,colj); nn<-rbind(nn,nnj)
}
}
}
}
if (prn=="CX") {
  tt<-c(0,0,0,0,"Outcome",xxlbl_[[1]][-1]); nn<-c(0,0,0,0,xb[1]);
  nxl<-length(xxlbl_[[1]])-1
  for (k in (1:nclv)) {
    wdtmp0<-WD;
    if (!is.na(colvname)) {
      if (k<nclv) wdtmp0<-WD[WD[,colvname]==clv[k],];
      print(paste("Stratified by",colvname, ":", clvb[k]))
    }
    for (m in 1:nmdl) {
      for (i in (1:ny)) {
        colj<-c(k,i,m,0,yb[i])
        nnj <-c(k,i,m,0)
        fml<-paste(yvname[i],"~",xvname_[1],fmlm[m]);
        wdtmp<-removeNA(i,1,m,wdtmp0)
        if (!is.na(colvname)) {if (k==nclv) fml<-paste(fml,"+factor(",colvname,")",sep="");}
        if (fmlp[m]=="gam") tmp.mdl<-setgam(fml,i)
        if (fmlp[m]=="gee") tmp.mdl<-setgee(fml,i)
        if (fmlp[m]=="glm") tmp.mdl<-setglm(fml,i)
        tmp.poi<-mdl2oo(tmp.mdl,xxname_[[1]],fmlp[m])
        colj<-c(colj,tmp.poi[[1]][-1]); nnj<-c(nnj,tmp.poi[[2]])
        tt<-rbind(tt,colj); nn<-rbind(nn,nnj)
      }
    }
  }
}
}
}
if (prn=="UM") {
  tt<-c(0,0,0,0,"Exposure","Univariable","Multivariable");
  nn<-
c(0,0,0,0,"Univariable","Multivariable")
  for (k in (1:nclv)) {
    wdtmp0<-WD;
    if (!is.na(colvname)) {

```

```

    if (k<nclv) wdtmp0<-WD[WD[,colvname]==clv[k],];
    print(paste("Stratified by",colvname, ":", clvb[k]))
  }
  for (i in 1:ny) {
    for (m in 1:nmdl) {
      colm<-rep(NA,6); nnm<-rep(NA,5)
      for (j in 1:(nx+1)) {
        colj<-cbind(k,i,m,j,xxlbl_[[j]]); nnj<-c(k,i,m,j)
        fml<-paste(yvname[i],"~",xvname_[j],fmlm[m]);
        wdtmp<-removeNA(i,j,m,wdtmp0)
        if (!is.na(colvname)) {if (k==nclv) fml<-paste(fml,"+factor(",colvname,")",sep="");}
        if (fmlp[m]=="gam") tmp.mdl<-setgam(fml,i)
        if (fmlp[m]=="gee") tmp.mdl<-setgee(fml,i)
        if (fmlp[m]=="glm") tmp.mdl<-setglm(fml,i)
        tmppoi<-mdl2oo(tmp.mdl,xxname_[[j]],fmlp[m])
        colj<-cbind(colj,tmppoi[[1]]); nnj<-c(nnj,tmpoi[[2]])
        if (j<=nx) {colm<-rbind(colm,colj); nnm<-rbind(nnm,nnj);
          } else {colm<-cbind(colm[-1,],tmppoi[[1]]); nnm<-cbind(nnm[-1,],tmpoi[[2]]);}
      }
      tt<-rbind(tt,colm); nn<-rbind(nn,nnm)
    }
  }
}
sink()
if (!contx & prn!="CX") rord<-c(rord[rord!=4],4)
if (prn=="X" | prn=="CX") rord<-rord[rord!=4]
if (prn=="Y") rord<-rord[rord!=2]
if (prn=="M") rord<-rord[rord!=3]
if (nx==1 & contx) rord<-rord[rord!=4]
if (nmdl==1) rord<-rord[rord!=3]
if (ny==1) rord<-rord[rord!=2]
if (is.na(colvname)) rord<-rord[rord!=1]
if (length(rord)==0) rord<-1
nrr<-length(rord)
for (i in nrr:1) {nn<-nn[order(as.numeric(nn[,rord[i]])),];tt<-tt[order(as.numeric(tt[,rord[i]])),];}
if (nn[2,4]>0) {nn[,4]<-c("Exposure",xb[as.numeric(nn[-1,4])]); } else {nn<-nn[,-4];}
if (nn[2,3]>0) {nn[,3]<-c("Model",fmlb[as.numeric(nn[-1,3])]); } else {nn<-nn[,-3];}
if (nn[2,2]>0) {nn[,2]<-c("Outcome",yb[as.numeric(nn[-1,2])]); } else {nn<-nn[,-2];}
if (!is.na(colvname)) {nn[,1]<-c(vlabel[vname==colvname],clvb_[as.numeric(nn[-1,1])]); } else
{nn<-nn[,-1];}
tb<-matrix(as.numeric(tt[,c(1:4)]),ncol=4);
if (!is.na(colvname)) {tt[,1]<-c(vlabelV[vnameV==colvname],clvb[tb[-1,1]]);}
if (ny>1) {tt[,2]<-c("Outcome",yb[tb[-1,2]]);}

```

```

if (nmdl>1) {tt[,3]<-c("Model",fmlb[tb[-1,3]]);}
nrr1<-nrr-1; oo<-tt[1,]; nc<-ncol(tt)-5; nr<-nrow(tt)
for (i in 2:nr) {
  if (nrr>1) {
    for (j in 1:nrr1) {
      if (tb[i,rord[j]]!=tb[i-1,rord[j]]) oo<-rbind(oo,c(rep(tt[i,rord[j]],5),rep(" ",nc)))
    }
  }
  oo<-rbind(oo,tt[i,])
}
if (rord[nrr]!=4 & tt[1,rord[nrr]]!="0") {oo<-cbind(oo[,rord[nrr]],oo[-(1:5)]);} else {oo<-oo[-(1:4)]}
w<-c(w,paste("<h2>", title, "</h2>"))
w<-c(w,"<br><table border=3>", mat2htmltable(oo), "</table>")
prnopt<-c("β (95%CI) Pvalue / OR (95%CI) Pvalue", "β (95%CI) Pvalue", "β+se / OR (95%CI)
**P<0.05 **P<0.01 ***P<0.001")

for (m in 1:nmdl) w<-c(w,paste("<br>",fmlb[m],"model adjust for:", adjvb[m]))
if (smoothav>0 | smoothsv>0) w<-c(w,". Generalized additive models were applied")
if (!is.na(subjvname)) w<-c(w, paste("<br>Generalized estimate equation were used, subject ID=",
subjvname, "(", gee.TYPE, ")",sep=""))

```

```

R.Version4RUN<-343;
R.LibLocation <- "C:/Users/15949/AppData/Roaming/EmpowerRCH/R343/library"
##### Regarding ALL Following R Functions #####
##### COPYRIGHT (c) 2010 X&Y Solutions, ALL RIGHT RESERVED #####
##### www.EmpowerStats.com #####
#####

Sys.setlocale("LC_TIME", "C")
library(doBy,lib.loc=R.LibLocation)
library(plotrix,lib.loc=R.LibLocation)
library(stringi,lib.loc=R.LibLocation)
library(stringr,lib.loc=R.LibLocation)
library(survival,lib.loc=R.LibLocation)
library(rms,lib.loc=R.LibLocation)
library(nnet,lib.loc=R.LibLocation)
library(car,lib.loc=R.LibLocation)
library(mgcv,lib.loc=R.LibLocation)
pdfwd<-6; pdfht<-6
setwd("C:/Users/15949/Desktop/Obesity/PROJ3_3_tbl")
load("C:/Users/15949/Desktop/Obesity/SIIobesityAA.Rdata")
if (length(which(ls()=="EmpowerStatsR"))==0) EmpowerStatsR<-get(ls()[1])

```

```
names(EmpowerStatsR)<-toupper(names(EmpowerStatsR))
```

```
rankvar <- function(var, num) {  
  qprobs <- 1/num  
  if (num>2) {for (i in (2:(num-1))) {qprobs <- c(qprobs, 1/num * i) }}  
  outvar <- rep(0, times=length(var))  
  outvar[is.na(var)] <- NA  
  cutpoints <- quantile(var,probs=qprobs, na.rm=TRUE)  
  for (k in (1:length(cutpoints))) {outvar[var>=cutpoints[k]] <- k}  
  tmp<-c(min(var,na.rm=TRUE),cutpoints,max(var,na.rm=TRUE))  
  names(tmp)<-c("Min",names(cutpoints),"Max")  
  print(tmp)  
  return(outvar)  
}
```

```
attach(EmpowerStatsR)  
sink("C:/Users/15949/Desktop/Obesity/datastep/PROJ3_datastep.lst")  
print("Creating new variable: SII.Q4")  
SII.Q4<- rankvar(SII,4)  
EmpowerStatsR<-cbind(EmpowerStatsR,SII.Q4)  
rm(SII.Q4)  
detach(EmpowerStatsR)  
sink()  
vname<-c("_N_", "_STAT_", "_TOTAL_", "SEQN", "GENDER", "GENDER.1", "GENDER.2")  
vname<-c(vname, "AGE", "RACE", "RACE.1", "RACE.2", "RACE.3", "RACE.4")  
vlabel<-c(vlabel, "AGE", "RACE", " 1", " 2", " 3", " 4")  
vname<-  
c(vname, "EDUCATION.LEVEL", "EDUCATION.LEVEL.1", "EDUCATION.LEVEL.2", "EDUC  
ATION.LEVEL.3")  
vlabel<-c(vlabel, "EDUCATION.LEVEL", " 1", " 2", " 3")  
vname<-  
c(vname, "MARITAL.STATUS", "MARITAL.STATUS.1", "MARITAL.STATUS.2", "MARITAL.S  
TATUS.3")  
vlabel<-c(vlabel, "MARITAL.STATUS", " 1", " 2", " 3")  
vname<-c(vname, "WTMECPRP", "RATIO.OF.FAMILY.INCOME.TO.POVERTY")  
vlabel<-c(vlabel, "WTMECPRP", "RATIO.OF.FAMILY.INCOME.TO.POVERTY")  
vname<-  
c(vname, "PIR", "PIR.1", "PIR.2", "PIR.3", "LYMPHOCYTE.NUMBER..1000.CELLS.UL.")  
vlabel<-c(vlabel, "PIR", " 1", " 2", " 3", "LYMPHOCYTE.NUMBER..1000.CELLS.UL.")  
vname<-  
c(vname, "NEUTROPHILS.NUM..1000.CELL.UL.", "PLATELET.COUNT..1000.CELLS.UL.")  
vlabel<-
```

```

c(vlabel,"NEUTROPHILS.NUM..1000.CELL.UL.,"PLATELET.COUNT..1000.CELLS.UL.")
vname<-c(vname,"SII","LGSII","SMOKE","SMOKE.1","SMOKE.2","SMOKE.3")
vlabel<-c(vlabel,"SII","LGSII","SMOKE"," 1"," 2"," 3")
vname<-c(vname,"SLEEP.DISORDER","SLEEP.DISORDER.1","SLEEP.DISORDER.2")
vlabel<-c(vlabel,"SLEEP.DISORDER"," 1"," 2")
vname<-
c(vname,"VIGOROUS.RECREATIONAL.ACTIVITIES","VIGOROUS.RECREATIONAL.ACTI
VITIES.1","VIGOROUS.RECREATIONAL.ACTIVITIES.2")
vlabel<-c(vlabel,"VIGOROUS.RECREATIONAL.ACTIVITIES"," 1"," 2")
vname<-
c(vname,"DAYS.VIGOROUS.RECREATIONAL.ACTIVITIES","DAYS.VIGOROUS.RECREAT
IONAL.ACTIVITIES.1","DAYS.VIGOROUS.RECREATIONAL.ACTIVITIES.2","DAYS.VIGO
ROUS.RECREATIONAL.ACTIVITIES.3","DAYS.VIGOROUS.RECREATIONAL.ACTIVITIE
S.4","DAYS.VIGOROUS.RECREATIONAL.ACTIVITIES.5","DAYS.VIGOROUS.RECREATI
ONAL.ACTIVITIES.6","DAYS.VIGOROUS.RECREATIONAL.ACTIVITIES.7")
vlabel<-c(vlabel,"DAYS.VIGOROUS.RECREATIONAL.ACTIVITIES"," 1"," 2"," 3","
4"," 5"," 6"," 7")
vname<-c(vname,"MINUTES.VIGOROUS.RECREATIONAL.ACTIVITIES")
vlabel<-c(vlabel,"MINUTES.VIGOROUS.RECREATIONAL.ACTIVITIES")
vname<-
c(vname,"MODERATE.RECREATIONAL.ACTIVITIES","MODERATE.RECREATIONAL.AC
TIVITIES.1","MODERATE.RECREATIONAL.ACTIVITIES.2")
vlabel<-c(vlabel,"MODERATE.RECREATIONAL.ACTIVITIES"," 1"," 2")
vname<-
c(vname,"DAYS.MODERATE.RECREATIONAL.ACTIVITIES","DAYS.MODERATE.RECRE
ATIONAL.ACTIVITIES.1","DAYS.MODERATE.RECREATIONAL.ACTIVITIES.2","DAYS.M
ODERATE.RECREATIONAL.ACTIVITIES.3","DAYS.MODERATE.RECREATIONAL.ACTIV
ITIES.4","DAYS.MODERATE.RECREATIONAL.ACTIVITIES.5","DAYS.MODERATE.RECR
EATIONAL.ACTIVITIES.6","DAYS.MODERATE.RECREATIONAL.ACTIVITIES.7","DAYS.
MODERATE.RECREATIONAL.ACTIVITIES.99")
vlabel<-c(vlabel,"DAYS.MODERATE.RECREATIONAL.ACTIVITIES"," 1"," 2"," 3","
4"," 5"," 6"," 7"," 99")
vname<-c(vname,"MINUTES.MODERATE.RECREATIONAL.ACTIVITIES")
vlabel<-c(vlabel,"MINUTES.MODERATE.RECREATIONAL.ACTIVITIES")
vname<-c(vname,"ACTIVITY","ACTIVITY.1","ACTIVITY.2","ACTIVITY.3")
vlabel<-c(vlabel,"ACTIVITY"," 1"," 2"," 3")
vname<-c(vname,"DRINK","DRINK.1","DRINK.2","BODY.MASS.INDEX..KG.M..2.")
vlabel<-c(vlabel,"DRINK"," 1"," 2","BODY.MASS.INDEX..KG.M..2.")
vname<-c(vname,"WAIST.CIRCUMFERENCE..CM.,"ENERGY..KCAL.")
vlabel<-c(vlabel,"WAIST.CIRCUMFERENCE..CM.,"ENERGY..KCAL.")
vname<-c(vname,"OBESITY","OBESITY.1","OBESITY.2","ENERGY..1000KCAL.")
vlabel<-c(vlabel,"OBESITY"," 1"," 2","ENERGY..1000KCAL.")
vname<-c(vname,"SII.Q4","SII.Q4.0","SII.Q4.1","SII.Q4.2","SII.Q4.3")
slt.vname<-c()

```

```

library(gdata,lib.loc=R.LibLocation)
library(geepack,lib.loc=R.LibLocation)
library(mgcv,lib.loc=R.LibLocation)

ofname<-"PROJ3_3_tbl";
WD<-EmpowerStatsR; wd.subset="";
svy.DSN.YN <- FALSE;
weights<-WD$WTMECPRP;weights.var <- 'wtmecprp';
WD<-cbind(WD,weights); WD<-WD[!is.na(weights),];
attach(WD)
subjvname<-NA;
yv<-cbind(WAIST.CIRCUMFERENCE..CM.);
yvname<-c('WAIST.CIRCUMFERENCE..CM. ');
yvar<-c('WAIST_CIRCUMFERENCE__CM_ ');
ydist<-c('gaussian');
ylink<-c('identity');
ylv<-c(0);
xv<-cbind(LGSII);
xvname<-c('LGSII');
xvar<-c('LGSII');
xlv<-c(0);
sxf<-c(NA,0)[-1];
sv<-
cbind(GENDER,AGE,RACE,EDUCATION.LEVEL,MARITAL.STATUS,PIR,SMOKE,SLEEP.D
ISORDER,ACTIVITY,DRINK,ENERGY..1000KCAL.);
svname<-
c('GENDER','AGE','RACE','EDUCATION.LEVEL','MARITAL.STATUS','PIR','SMOKE','SLEEP
.DISORDER','ACTIVITY','DRINK','ENERGY..1000KCAL. ');
svar<-
c('GENDER','AGE','RACE','EDUCATION_LEVEL','MARITAL_STATUS','PIR','SMOKE','SLEE
P_DISORDER','ACTIVITY','DRINK','ENERGY__1000KCAL_ ');
sdf<-c(NA,0,0,0,0,0,0,0,0,0,0,0)[-1];
slv<-c(2,0,4,3,3,3,3,2,3,2,0);
av<-cbind(GENDER,AGE,RACE);
avname<-c('GENDER','AGE','RACE');
if (!is.na(avname[1])) avlbl<-vlabel[match(avname, vname)];
nadj<-length(avname);alv<-c(2,0,4);
saf<-c(NA,0,0,0)[-1];
timev<-NA; timevname<-NA;
bv<-NA; bvar<-NA;
colv<-NA; colvname<-NA;
v.start<-NA; vname.start<-NA;
v.stop<-NA; vname.stop<-NA;
par1<-1;dec<-2;parm<-c(1,NA, 1,1, 0);

```

```

if (!exists("pdfwd")) pdfwd<-6;
if (!exists("pdfht")) pdfht<-6;
##R package## gdata geepack mgcv ##R package##;
pvformat<-function(p,dec) {
  pp <- sprintf(paste("%.",dec,"f",sep=""),as.numeric(p))
  if (is.matrix(p)) {pp<-matrix(pp, nrow=nrow(p)); colnames(pp)<-colnames(p);rownames(pp)<-
rownames(p);}
  lw <- paste("<",substr("0.0000000000",1,dec+1),"1",sep="");
  pp[as.numeric(p)<(1/10^dec)]<-lw
  return(pp)
}
numfmt<-function(p,dec) {
  if (is.list(p)) p<-as.matrix(p)
  pp <- sprintf(paste("%.",dec,"f",sep=""),as.numeric(p))
  if (is.matrix(p)) {pp<-matrix(pp, nrow=nrow(p));colnames(pp)<-colnames(p);rownames(pp)<-
rownames(p);}
  pp[as.numeric(p)>10000000]<- "inf."
  pp[is.na(p) | gsub(" ",",",p)==""]<- ""
  pp[p=="-Inf"]<- "-Inf"
  pp[p=="Inf"]<- "Inf"
  return(pp)
}

varstats<-function(var,vlvl,dec) {
  if (length(vlvl)==1 & vlvl[1]==0) {

return(paste(numfmt(mean(var,na.rm=TRUE),dec),numfmt(sd(var,na.rm=TRUE),dec),sep="+"))
  } else {
    a<-table(var)
    b<-matrix(paste(a, " (", numfmt(a/sum(a)*100,dec), "%)",sep=""),ncol=1)
    return(c(" ",b[match(vlvl, names(a))]))
  }
}

mat2htmltable<-function(mat) {
  t1<- apply(mat,1,function(z) paste(z,collapse="</td><td>"))
  t2<- paste("<tr><td>",t1,"</td></tr>")
  return(paste(t2,collapse=" "))
}

setgam<-function(fml,yi) {
  if (ydist[yi]=="") ydist[yi]<-"gaussian"
  if (ydist[yi]=="exact") ydist[yi]<-"binomial"
  if (ydist[yi]=="breslow") ydist[yi]<-"binomial"
  if (ydist[yi]=="gaussian") mdl<-try(gam(formula(fml),weights=wdtmp$weights,data=wdtmp,
family=gaussian(link="identity")))

```

```

    if (ydist[yi]=="binomial") mdl<-try(gam(formula(fml),weights=wdtmp$weights,data=wdtmp,
family=binomial(link="logit")))
    if (ydist[yi]=="poisson") mdl<-try(gam(formula(fml),weights=wdtmp$weights,data=wdtmp,
family=poisson(link="log")))
    if (ydist[yi]=="gamma") mdl<-try(gam(formula(fml),weights=wdtmp$weights,data=wdtmp,
family=Gamma(link="inverse")))
    if (ydist[yi]=="negbin") mdl<-try(gam(formula(fml),weights=wdtmp$weights,data=wdtmp,
family=negbin(c(1,10), link="log")))
    return(mdl)
}
setgee<-function(fml,yi) {
  if (ydist[yi]=="") ydist[yi]<-"gaussian"
  if (ydist[yi]=="exact") ydist[yi]<-"binomial"
  if (ydist[yi]=="breslow") ydist[yi]<-"binomial"
  if (ydist[yi]=="gaussian") md<-
try(geeglm(formula(fml),id=wdtmp[,subjvname],corstr=gee.TYPE,family="gaussian",weights=w
dtmp$weights,data=wdtmp))
  if (ydist[yi]=="binomial") md<-
try(geeglm(formula(fml),id=wdtmp[,subjvname],corstr=gee.TYPE,family="binomial",weights=w
dtmp$weights,data=wdtmp))
  if (ydist[yi]=="poisson") md<-
try(geeglm(formula(fml),id=wdtmp[,subjvname],corstr=gee.TYPE,family="poisson",weights=wdt
mp$weights,data=wdtmp))
  if (ydist[yi]=="gamma") md<-
try(geeglm(formula(fml),id=wdtmp[,subjvname],corstr=gee.TYPE,family="Gamma",weights=wdt
mp$weights,data=wdtmp))
  if (ydist[yi]=="negbin") md<-
try(geeglm.nb(formula(fml),id=wdtmp[,subjvname],corstr=gee.TYPE,weights=wdtmp$weights,da
ta=wdtmp))
  return(md)
}
setglm<-function(fml,yi) {
  if (ydist[yi]=="") ydist[yi]<-"gaussian"
  if (ydist[yi]=="exact") ydist[yi]<-"binomial"
  if (ydist[yi]=="breslow") ydist[yi]<-"binomial"
  if (ydist[yi]=="gaussian") md<-
try(glm(formula(fml),family="gaussian",weights=wdtmp$weights,data=wdtmp))
  if (ydist[yi]=="binomial") md<-
try(glm(formula(fml),family="binomial",weights=wdtmp$weights,data=wdtmp))
  if (ydist[yi]=="poisson") md<-
try(glm(formula(fml),family="poisson",weights=wdtmp$weights,data=wdtmp))
  if (ydist[yi]=="gamma") md<-
try(glm(formula(fml),family="Gamma",weights=wdtmp$weights,data=wdtmp))
  if (ydist[yi]=="negbin") md<-try(glm.nb(formula(fml),weights=wdtmp$weights,data=wdtmp))

```



```

return(md)
}
mdl2oo<-function(mdl, xxname, opt) {
  if (is.na(mdl[[1]][1])) return(list(rep("",times=length(xxname)), ""))
  if (substr(mdl[[1]][1],1,5)=="Error") return(list(rep("",times=length(xxname)), ""))
  gs<-summary(mdl); print(mdl$formula); print(gs)
  if (opt=="gam") {gsparm <- gs$p.table;tmpn<-gs$n;
  } else {gsparm <- gs$coefficients;tmpn <- sum(gs$df[c(1,2)]);}
  gsp<-gsparm[match(xxname,rownames(gsparm)),]
  if (length(xxname)==1) {beta<-gsp[1]; se<-gsp[2]; pv<-gsp[4];
  } else {beta<-gsp[,1]; se<-gsp[,2]; pv<-gsp[,4]; }
  ci1<- beta-1.96*se; ci2<- beta+1.96*se
  pvx<-substr(rep("****",length(pv)),1,(pv<=0.05)+(pv<=0.01)+(pv<=0.001))
  if (colprn==3) {pvv<-pvx;} else {pvv<-pvformat(pv,dec+2);}
  if ((colprn!=2) & (gs$family[[2]]=="log" | gs$family[[2]]=="logit")) {
    o1<-paste(numfmt(exp(beta),dec)," (" ,numfmt(exp(ci1),dec),"
,numfmt(exp(ci2),dec),"",sep="")
  } else {
    if (colprn<3) {o1<-paste(numfmt(beta,dec), " (" ,numfmt(ci1,dec),"
,numfmt(ci2,dec),"",sep="")
  } else {o1<-paste(numfmt(beta,dec), "+",numfmt(se,dec),sep="");}
  }
  o1<-paste(o1,pvv); o1[is.na(beta)]<-NA
  if (length(xxname)>1) {
    if (gs$family[[2]]=="log" | gs$family[[2]]=="logit") {
      o1[is.na(o1) & substr(xxname,1,7)=="factor("<- "1.0"
    } else {o1[is.na(o1) & substr(xxname,1,7)=="factor("<- "0";}
    o1[is.na(o1)]<-"";
  }
  return(list(o1,tmpn))
}
recodevar <- function (var,oldcode,newcode) {
  tmp.v <- var
  nc.tmp <- length(oldcode)
  for (i in (1:nc.tmp)) {tmp.v[(var==oldcode[i])]=newcode[i]}
  if (is.factor(tmp.v)) {tmp.v1<-as.numeric(as.character(tmp.v))} else {tmp.v1<-
as.numeric(tmp.v)}
  rm(tmp.v); return(tmp.v1)
}
rankvar <- function(var, num) {
  qprobs <- 1/num
  if (num>2) {for (i in (2:(num-1))) {qprobs <- c(qprobs, 1/num * i) } }
  outvar <- rep(0, times=length(var))
  outvar[is.na(var)] <- NA
}

```

```

cutpoints <- quantile(var,probs=qprobs, na.rm=TRUE)
for (k in (1:length(cutpoints))) { outvar[var>=cutpoints[k]] <- k; }
return(outvar)
}
removeNA<-function(i,j,m,wdf) {
  vvv<-c(yvname[i],adjvv[[m]],subjvname,colvname,bvar,vname.start,vname.stop,timevname);
  if (j<=nx) {vvv<-c(vvv,xvname[j]);} else {vvv<-c(vvv,xvname);}
  vvv<-vvv[!is.na(vvv)]; vvv<-vvv[vvv>" "]
  tmp<-is.na(wdf[,vvv]);
  return(wdf[apply(tmp,1,sum)==0,])
}
vlabelN<-(substr(vlabel,1,1)==" ");
vlabelZ<-vlabel[vlabelN];vlabelV<-vlabel[!vlabelN]
vnameV<-vname[!vlabelN];vnameZ<-vname[vlabelN]
w<-c("<html><head>","<meta http-equiv=\"Content-Type\" content=\"text/html\"
charset=\"gb2312\" /></head><body>")
if (!is.na(avname[1])) {
  if (sum((saf=="s" | saf=="S") & alv>0)>0) w<-c(w,"<br>Spline smoothing only applies for
continuous variables")
  if (!is.na(subjvname) & (sum((saf=="s" | saf=="S") & alv==0)>0)) w<-c(w,"<br>Generalized
estimate equation could not be used with spline smoothing terms")
}
if (!is.na(svname[1])) {
  if (sum((sdf=="s" | sdf=="S") & slv>0)>0) w<-c(w,"<br>Spline smoothing only applies for
continuous variables")
  if (!is.na(subjvname) & (sum((sdf=="s" | sdf=="S") & slv==0)>0)) w<-c(w,"<br>Generalized
estimate equation could not be used with spline smoothing terms")
}
allvname<-
c(yvname,xvname,colvname,bvar,avname,svname,subjvname,vname.start,vname.stop,timevname,
"weights");
allvname<-allvname[!is.na(allvname)]
WD<-WD[,allvname];
if (!is.na(subjvname)) WD<-WD[order(WD[,subjvname]),]
if (!is.na(sxf[1])) {
  if (sum(sxf>1 & xlv>0)>0) w<-c(w,"Categorizing only applies to continuous variables");
  if (sum(sxf>1 & xlv==0)>0) {
    t.xname<-NA;t.xlv<-NA; nx<-length(xvname)
    for (i in 1:nx) {
      if (sxf[i]>1 & xlv[i]==0) {
        tmp.Xi<- rankvar(WD[,xvname[i]],sxf[i])
        tmp.newcode <- tapply(WD[,xvname[i]],tmp.Xi,function(z) median(z,na.rm=TRUE))
        tmp.low <- tapply(WD[,xvname[i]],tmp.Xi,function(z) min(z,na.rm=TRUE))
        tmp.upp <- tapply(WD[,xvname[i]],tmp.Xi,function(z) max(z,na.rm=TRUE))

```

```

    tmp.Xi2<- recodevar(tmp.Xi,(1:sxf[i])-1,tmp.newcode)
    tmp.Xi<-cbind(tmp.Xi,tmp.Xi2)
    tmp.NM<-paste(xvname[i],c("grp","grp.cont"),sep=".")
    colnames(tmp.Xi)<-tmp.NM
    WD<-cbind(WD,tmp.Xi)
    t.xname<-c(t.xname,tmp.NM)
    t.xlv<-c(t.xlv,sxf[i],0)
    vnameV<-c(vnameV,tmp.NM)
    vlabelV<-c(vlabelV,paste(vlabelV[vnameV==xvname[i]],c("group","group trend")))
    vnameZ<-c(vnameZ,paste(tmp.NM[1],(1:sxf[i])-1,sep="."))
    vlabelZ<-c(vlabelZ,paste(tmp.low,"-",tmp.upp))
  } else {
    t.xname<-c(t.xname,xvname[i]); t.xlv<-c(t.xlv,xlv[i])
  }
}
xvname<-t.xname[-1]; xlv<-t.xlv[-1];
}
}
rm(xv,yv,bv,av,sv,colv,v.start,v.stop)
if (!is.na(subjvname)) {
  if (!is.na(avname[1])) saf<-rep(0,length(saf));
  if (!is.na(svname[1])) sdf<-rep(0,length(sdf));
  WD<-WD[order(WD[,subjvname]),];
}
fmlm<-" "; fmlb<-"Non-adjusted"; tmp<-""; adjvv<-list(NA); adjvb<-"None";
fmlp<-ifelse(!is.na(subjvname), "gee", "glm");
na=0; avb=""; smoothav<-0; nadjm<-0
if (!is.na(avname[1])) {
  na<-length(avname)
  avb<-vlabelV[match(avname,vnameV)];
  avname_ <- avname
  smoothavi<-((saf=="s" | saf=="S") & alv==0)
  smoothav<-sum(smoothavi)
  smoothavname<-avname[smoothavi]
  avname_[smoothavi]<-paste("s(",avname[smoothavi],")",sep="")
  avb1<-avb
  avb1[smoothavi]<-paste(avb[smoothavi],"(Smooth)",sep="")
  avname_[alv>0]<-paste("factor(",avname[alv>0],")",sep="")
  fmlm<-c(fmlm,paste("+",paste(avname_,collapse="+")))
  fmlb<-c(fmlb,"Adjust")
  nadjm<-nadjm+1; tmp<-c(tmp,"I"); adjvv[[nadjm+1]]<-avname;
  adjvb<-c(adjvb, paste(avb1, collapse="; "))
  fmlp<-c(fmlp,ifelse(!is.na(subjvname), "gee", ifelse(smoothav>0, "gam", "glm")))
}

```

```

ns=0; svb=""; smoothsv<-0
if (!is.na(svname[1])) {
  svb<-vlabelV[match(svname,vnameV)];
  svname_ <- svname
  smoothsvi<-((sdf=="s" | sdf=="S") & slv==0)
  smoothsv<-sum(smoothsvi)
  smoothsvname<-svname[smoothsvi]
  svname_[smoothsvi]<-paste("s(",svname[smoothsvi],")",sep="")
  svb1<-svb
  svb1[smoothsvi]<-paste(svb[smoothsvi],"(Smooth)",sep="")
  svname_[slv>0]<-paste("factor(",svname[slv>0],")",sep="")
  fmlm<-c(fmlm,paste("+",paste(svname_,collapse="+")))
  fmlb<-c(fmlb,"Adjust")
  nadjm<-nadjm+1; tmp<-c(tmp,"II"); adjvv[[nadjm+1]]<-svname
  adjvb<-c(adjvb, paste(svb1, collapse="; "))
  fmlp<-c(fmlp,ifelse(!is.na(subjvname), "gee", ifelse(smoothsv>0, "gam", "glm")))
}
if (is.na(parm[1]) & length(fmlm)>1) {
  fmlm<-fmlm[-1]; fmlb<-fmlb[-1]; tmp<-tmp[-1]; adjvv<-adjvv[-1]; adjvb<-adjvb[-1]; fmlp<-
fmlp[-1];
}
if (nadjm>1) fmlb<-paste(fmlb,tmp)
nmdl<-length(fmlm)

ny=length(yvname); nx=length(xvname);
xb<-vlabelV[match(xvname,vnameV)]; xb[is.na(xb)]<-xvname[is.na(xb)]
yb<-vlabelV[match(yvname,vnameV)]; yb[is.na(yb)]<-yvname[is.na(yb)]
xvname_ <- xvname
xvname_[xlv>0]<-paste("factor(",xvname[xlv>0],")",sep="")
xxname_<-list(NA); xxlbl_<-list(NA); xxlvl_<-list(NA)
for (j in (1:nx)) {
  if (xlv[j]==0) {
    xxname_[[j+1]]<-xvname[j];xxlbl_[[j+1]]<-xb[j];xxlvl_[[j+1]]<-0
  } else {
    xxlvl_[[j+1]]<-levels(factor(WD[,xvname[j]]))
    tmp<-paste(xvname[j],".",xxlvl_[[j+1]],sep="")
    xxlbl_[[j+1]]<-c(xb[j],vlabelZ[match(tmp,vnameZ)])
    xxlbl_[[j+1]]<-paste(c("","rep("&nbsp;&nbsp;  ","",length(xxlbl_[[j+1]])-1),xxlbl_[[j+1]])
    xxname_[[j+1]]<-c(xvname[j],paste("factor(",xvname[j],")",xxlvl_[[j+1]],sep=""))
  }
}
xxname_<-xxname_[-1]; xxlbl_<-xxlbl_[-1]; xxlvl_<-xxlvl_[-1];
if (nx==1) par1<-1;
if (is.na(par1)) par1<-1;

```

```

if (par1>1) {
  tmp1<-xxname_[[1]]; tmp2<-xxlbl_[[1]]
  for (j in 2:nx) {tmp1<-c(tmp1,xxname_[[j]]); tmp2<-c(tmp2,xxlbl_[[j]])};
  xxname_[[nx+1]]<-tmp1; xxlbl_[[nx+1]]<-tmp2;
  xvname_<-c(xvname_,paste(xvname_,collapse="+"))
}
contx<-(sum(xlv>0)==0)
if (par1==3 & !is.na(bvar)) {w<-c(w,"<br>Column stratified variable was ignored"); bvar<-NA;
bvname<-NA;}

if (is.na(bvar) & !is.na(colvname) & nmdl==1 & par1!=3) {if ((ny==1) | (nx==1 & contx)) {bvar<-
colvname; colvname<-NA;}}
if (is.na(colvname)) {
  nclv<-1; clvb<-"Total"; clvb_<-"Total"
} else {
  clv<-levels(factor(WD[,colvname])); nclv<-length(clv)+1
  clvb_<-vlabelZ[match(paste(colvname,".",clv,sep=""),vnameZ)];          clvb_[is.na(clvb_)]<-
clv[is.na(clvb_)];
  clvb<-c(paste(vlabelV[vnameV==colvname],clvb_,sep=""),"Total");
  clvb_<-c(clvb_,"Total")
  WD<-WD[!is.na(WD[,colvname]),]
}
if (is.na(bvar)) {
  blvb<-"Total"; blvb_<-"Total"
} else {
  blv<-levels(factor(WD[,bvar])); nblv<-length(blv)+1
  blvb_<-vlabelZ[match(paste(bvar,".",blv,sep=""),vnameZ)];          blvb_[is.na(blvb_)]<-
blv[is.na(blvb_)];
  blvb<-c(paste(vlabelV[vnameV==bvar],blvb_,sep=""),"Total");
  blvb_<-c(blvb_,"Total")
  WD<-WD[!is.na(WD[,bvar]),]
}
aa<-c(1,2,3,4)
for (i in 1:4) {
  for (j in c(1:4)[-i]) {
    for (k in c(1:4)[-c(i,j)]) aa<-rbind(aa,c(i,j,k,c(1:4)[-c(i,j,k)]))
  }
}
if (is.na(parm[4])) parm[4]<-1
rord<-aa[parm[4],]
if (!is.na(bvar)) {prn<-"S";
} else {
  if (parm[4]>1) {
    rordc<-ifelse(rord[4]==1,3,4)
  }
}

```

```

prn<-c("G","Y","M","X")[rord[rordc]]
if (prn=="X") {
  if (!contx & nx>1) prn<-ifelse(nmdl>1, "M", ifelse(ny>nx & contx, "X", "Y"))
  if (!contx & nx==1) prn<-"CX"
  if (par1==2) {tmp<-ifelse(rordc==4,ifelse(rord[3]==1,2,3),2); prn<-
c("G","Y","M","X")[rord[tmp]];}
}
} else {
  prn<-ifelse(nmdl>1, "M", ifelse(ny>nx & contx, "X", "Y"))
  if (par1==2) prn<-ifelse(nmdl>1, "M", "Y")
}
if (par1==3) prn<-"UM"
}
colprn<-parm[3];
sink(paste(ofname,".lst",sep=""))
if (par1==2) {xbgn<-nx+1; xend<-nx+1;} else {xbgn<-1; xend<-nx;}
if (prn=="Y") {
  tt<-c(0,0,0,0,"Exposure",yb); nn<-c(0,0,0,0,yb);
  for (k in (1:nclv)) {
    wdtmp0<-WD;
    if (!is.na(colvname)) {
      if (k<nclv) wdtmp0<-WD[WD[,colvname]==clv[k],];
      print(paste("Stratified by",colvname, ":", clvb[k]))
    }
    for (m in 1:nmdl) {
      for (j in (xbgn:xend)) {
        colj<-cbind(k,0,m,j,xxlbl_[[j]])
        nnj <-c(k,0,m,j)
        for (i in (1:ny)) {
          fml<-paste(yvname[i],"~",xvname_[j],fmlm[m]);
          wdtmp<-removeNA(i,j,m,wdtmp0)
          if (!is.na(colvname)) {if (k==nclv) fml<-paste(fml,"+factor(",colvname,")",sep="");}
          if (fmlp[m]=="gam") tmp.mdl<-setgam(fml,i)
          if (fmlp[m]=="gee") tmp.mdl<-setgee(fml,i)
          if (fmlp[m]=="glm") tmp.mdl<-setglm(fml,i)
          tmppooi<-mdl2oo(tmp.mdl,xxname_[[j]],fmlp[m])
          colj<-cbind(colj,tmppooi[[1]]); nnj<-c(nnj,tmppooi[[2]])
        }
        tt<-rbind(tt,colj); nn<-rbind(nn,nnj)
      }
    }
  }
}
if (prn=="S") {

```

```

tt<-c(0,0,0,0,"Exposure",blvb); nn<-c(0,0,0,0,blvb);
for (k in (1:nclv)) {
  wdtmp0<-WD;
  if (!is.na(colvname)) {
    if (k<nclv) wdtmp0<-WD[WD[,colvname]==clv[k],];
    print(paste("Stratified by",colvname, ":", clvb[k]))
  }
  for (i in (1:ny)) {
    for (m in 1:nmdl) {
      for (j in (xbgn:xend)) {
        colj<-cbind(k,i,m,j,xxlbl_[[j]]);
        nnj <- c(k,i,m,j)
        for (b in (1:nblv)) {
          print(paste("Stratified by",bvar, ":", blvb[b]))
          fml<-paste(yvname[i],"~",xvname_[j],fmlm[m]);
          if (b<nblv) {
            wdtmp1<-wdtmp0[wdtmp0[,bvar]==blv[b],];
          } else {
            wdtmp1<-wdtmp0; fml<-paste(fml,"+factor(",bvar,")",sep="");
          }
          wdtmp<-removeNA(i,j,m,wdtmp1)
          if (!is.na(colvname)) {if (k==nclv) fml<-paste(fml,"+factor(",colvname,")",sep="");}
          if (fmlp[m]=="gam") tmp.mdl<-setgam(fml,i)
          if (fmlp[m]=="gee") tmp.mdl<-setgee(fml,i)
          if (fmlp[m]=="glm") tmp.mdl<-setglm(fml,i)
          tmppooi<-mdl2oo(tmp.mdl,xxname_[[j]],fmlp[m])
          colj<-cbind(colj,tmppooi[[1]]); nnj<-c(nnj,tmppooi[[2]])
        }
        tt<-rbind(tt,colj); nn<-rbind(nn,nnj)
      }
    }
  }
}
}
}
}
if (prn=="M") {
  tt<-c(0,0,0,0,"Exposure",fmlb); nn<-c(0,0,0,0,fmlb)
  for (k in (1:nclv)) {
    wdtmp0<-WD;
    if (!is.na(colvname)) {
      if (k<nclv) wdtmp0<-WD[WD[,colvname]==clv[k],];
      print(paste("Stratified by",colvname, ":", clvb[k]))
    }
    for (i in 1:ny) {
      for (j in xbg:nxend) {

```

```

colj<-cbind(k,i,0,j,xxlbl_[[j]]); nnj<-c(k,i,0,j)
for (m in 1:nmdl) {
  fml<-paste(yvname[i],"~",xvname_[j],fmlm[m]);
  wdtmp<-removeNA(i,j,m,wdtmp0)
  if (!is.na(colvname)) {if (k==nclv) fml<-paste(fml,"+factor(",colvname,")",sep="");}
  if (fmlp[m]=="gam") tmp.mdl<-setgam(fml,i)
  if (fmlp[m]=="gee") tmp.mdl<-setgee(fml,i)
  if (fmlp[m]=="glm") tmp.mdl<-setglm(fml,i)
  tmppooi<-mdl2oo(tmp.mdl,xxname_[[j]],fmlp[m])
  colj<-cbind(colj,tmppooi[[1]]); nnj<-c(nnj,tmppooi[[2]])
}
tt<-rbind(tt,colj); nn<-rbind(nn,nnj)
}
}
}
}
if (prn=="X") {
  tt<-c(0,0,0,0,"Outcome",xb); nn<-c(0,0,0,0,xb);
  for (k in (1:nclv)) {
    wdtmp0<-WD;
    if (!is.na(colvname)) {
      if (k<nclv) wdtmp0<-WD[WD[,colvname]==clv[k],];
      print(paste("Stratified by",colvname, ":", clvb[k]))
    }
  }
  for (m in 1:nmdl) {
    for (i in (1:ny)) {
      colj<-cbind(k,i,m,0,yb[i])
      nnj <-c(k,i,m,0)
      for (j in (1:nx)) {
        fml<-paste(yvname[i],"~",xvname_[j],fmlm[m]);
        wdtmp<-removeNA(i,j,m,wdtmp0)
        if (!is.na(colvname)) {if (k==nclv) fml<-paste(fml,"+factor(",colvname,")",sep="");}
        if (fmlp[m]=="gam") tmp.mdl<-setgam(fml,i)
        if (fmlp[m]=="gee") tmp.mdl<-setgee(fml,i)
        if (fmlp[m]=="glm") tmp.mdl<-setglm(fml,i)
        tmppooi<-mdl2oo(tmp.mdl,xxname_[[j]],fmlp[m])
        colj<-cbind(colj,tmppooi[[1]]); nnj<-c(nnj,tmppooi[[2]])
      }
      tt<-rbind(tt,colj); nn<-rbind(nn,nnj)
    }
  }
}
}
}
if (prn=="CX") {

```



```

tt<-c(0,0,0,0,"Outcome",xxlbl_[[1]][-1]); nn<-c(0,0,0,0,xb[1]);
nxl<-length(xxlbl_[[1]])-1
for (k in (1:nclv)) {
  wdtmp0<-WD;
  if (!is.na(colvname)) {
    if (k<nclv) wdtmp0<-WD[WD[,colvname]==clv[k],];
    print(paste("Stratified by",colvname, ":", clvb[k]))
  }
  for (m in 1:nmdl) {
    for (i in (1:ny)) {
      colj<-c(k,i,m,0,yb[i])
      nnj <-c(k,i,m,0)
      fml<-paste(yvname[i],"~",xvname_[1],fmlm[m]);
      wdtmp<-removeNA(i,1,m,wdtmp0)
      if (!is.na(colvname)) {if (k==nclv) fml<-paste(fml,"+factor(",colvname,")",sep="");}
      if (fmlp[m]=="gam") tmp.mdl<-setgam(fml,i)
      if (fmlp[m]=="gee") tmp.mdl<-setgee(fml,i)
      if (fmlp[m]=="glm") tmp.mdl<-setglm(fml,i)
      tmppooi<-mdl2oo(tmp.mdl,xxname_[[1]],fmlp[m])
      colj<-c(colj,tmppooi[[1]][-1]); nnj<-c(nnj,tmppooi[[2]])
      tt<-rbind(tt,colj); nn<-rbind(nn,nnj)
    }
  }
}
}
}
if (prn=="UM") {
  tt<-c(0,0,0,0,"Exposure", "Univariable", "Multivariable");
  nn<-
c(0,0,0,0, "Univariable", "Multivariable")
  for (k in (1:nclv)) {
    wdtmp0<-WD;
    if (!is.na(colvname)) {
      if (k<nclv) wdtmp0<-WD[WD[,colvname]==clv[k],];
      print(paste("Stratified by",colvname, ":", clvb[k]))
    }
    for (i in 1:ny) {
      for (m in 1:nmdl) {
        colm<-rep(NA,6); nnm<-rep(NA,5)
        for (j in 1:(nx+1)) {
          colj<-cbind(k,i,m,j,xxlbl_[[j]]); nnj<-c(k,i,m,j)
          fml<-paste(yvname[i],"~",xvname_[j],fmlm[m]);
          wdtmp<-removeNA(i,j,m,wdtmp0)
          if (!is.na(colvname)) {if (k==nclv) fml<-paste(fml,"+factor(",colvname,")",sep="");}
          if (fmlp[m]=="gam") tmp.mdl<-setgam(fml,i)
          if (fmlp[m]=="gee") tmp.mdl<-setgee(fml,i)

```

```

    if (fmlp[m]=="glm") tmp.mdl<-setglm(fml,i)
    tmp.poi<-mdl2oo(tmp.mdl,xxname_[[j]],fmlp[m])
    colj<-cbind(colj,tmp.poi[[1]]); nnj<-c(nnj,tmp.poi[[2]])
    if (j<=nx) {colm<-rbind(colm,colj); nnm<-rbind(nnm,nnj);
    } else {colm<-cbind(colm[-1,],tmp.poi[[1]]); nnm<-cbind(nnm[-1,],tmp.poi[[2]]);}
  }
  tt<-rbind(tt,colm); nn<-rbind(nn,nnm)
}
}
}
}
sink()
if (!contx & prn!="CX") rord<-c(rord[rord!=4],4)
if (prn=="X" | prn=="CX") rord<-rord[rord!=4]
if (prn=="Y") rord<-rord[rord!=2]
if (prn=="M") rord<-rord[rord!=3]
if (nx==1 & contx) rord<-rord[rord!=4]
if (nmdl==1) rord<-rord[rord!=3]
if (ny==1) rord<-rord[rord!=2]
if (is.na(colvname)) rord<-rord[rord!=1]
if (length(rord)==0) rord<-1
nrr<-length(rord)
for (i in nrr:1) {nn<-nn[order(as.numeric(nn[,rord[i]])),];tt<-tt[order(as.numeric(tt[,rord[i]])),];}
if (nn[2,4]>0) {nn[,4]<-c("Exposure",xb[as.numeric(nn[-1,4])]); } else {nn<-nn[,-4];}
if (nn[2,3]>0) {nn[,3]<-c("Model",fmlb[as.numeric(nn[-1,3])]); } else {nn<-nn[,-3];}
if (nn[2,2]>0) {nn[,2]<-c("Outcome",yb[as.numeric(nn[-1,2])]); } else {nn<-nn[,-2];}
if (!is.na(colvname)) {nn[,1]<-c(vlabel[vname==colvname],clvb_[as.numeric(nn[-1,1])]); } else
{nn<-nn[,-1];}
tb<-matrix(as.numeric(tt[,c(1:4)]),ncol=4);
if (!is.na(colvname)) {tt[,1]<-c(vlabelV[vnameV==colvname],clvb[tb[-1,1]]);}
if (ny>1) {tt[,2]<-c("Outcome",yb[tb[-1,2]]);}
if (nmdl>1) {tt[,3]<-c("Model",fmlb[tb[-1,3]]);}
nrr1<-nrr-1; oo<-tt[1,]; nc<-ncol(tt)-5; nr<-nrow(tt)
for (i in 2:nr) {
  if (nrr>1) {
    for (j in 1:nrr1) {
      if (tb[i,rord[j]]!=tb[i-1,rord[j]]) oo<-rbind(oo,c(rep(tt[i,rord[j]],5),rep(" ",nc)))
    }
  }
  oo<-rbind(oo,tt[i,])
}
if (rord[nrr]!=4 & tt[1,rord[nrr]]!="0") {oo<-cbind(oo[,rord[nrr]],oo[-(1:5)]);} else {oo<-oo[-(1:4)]}
w<-c(w,paste("<h2>", title, "</h2>"))

```

```
w<-c(w,"<br><table border=3>", mat2htmltable(oo), "</table>")
prnpt<-c("β (95%CI) Pvalue / OR (95%CI) Pvalue", "β (95%CI) Pvalue", "β+se / OR (95%CI)
**P<0.05 **P<0.01 ***P<0.001")
for (m in 1:nmdl) w<-c(w,paste("<br>",fmlb[m],"model adjust for:", adjvb[m]))
if (smoothav>0 | smoothsv>0) w<-c(w,". Generalized additive models were applied")
if (!is.na(subjvname)) w<-c(w, paste("<br>Generalized estimate equation were used, subject ID=",
subjvname, "(", gee.TYPE, ")",sep=""))
```

```
R.Version4RUN<-343;
R.LibLocation <- "C:/Users/15949/AppData/Roaming/EmpowerRCH/R343/library"
##### Regarding ALL Following R Functions #####
##### COPYRIGHT (c) 2010 X&Y Solutions, ALL RIGHT RESERVED #####
##### www.EmpowerStats.com #####
#####

Sys.setlocale("LC_TIME", "C")
library(doBy,lib.loc=R.LibLocation)
library(plotrix,lib.loc=R.LibLocation)
library(stringi,lib.loc=R.LibLocation)
library(stringr,lib.loc=R.LibLocation)
library(survival,lib.loc=R.LibLocation)
library(rms,lib.loc=R.LibLocation)
library(nnet,lib.loc=R.LibLocation)
library(car,lib.loc=R.LibLocation)
library(mgcv,lib.loc=R.LibLocation)
pdfwd<-6; pdfht<-6
setwd("C:/Users/15949/Desktop/Obesity/PROJ3_4_tbl1")
load("C:/Users/15949/Desktop/Obesity/SIIobesityAA.Rdata")
if (length(which(ls()=="EmpowerStatsR"))==0) EmpowerStatsR<-get(ls()[1])
names(EmpowerStatsR)<-toupper(names(EmpowerStatsR))
```

```
rankvar <- function(var, num) {
  qprobs <- 1/num
  if (num>2) {for (i in (2:(num-1))) {qprobs <- c(qprobs, 1/num * i) }}
  outvar <- rep(0, times=length(var))
  outvar[is.na(var)] <- NA
  cutpoints <- quantile(var,probs=qprobs, na.rm=TRUE)
  for (k in (1:length(cutpoints))) {outvar[var>=cutpoints[k]] <- k}
  tmp<-c(min(var,na.rm=TRUE),cutpoints,max(var,na.rm=TRUE))
  names(tmp)<-c("Min",names(cutpoints),"Max")
  print(tmp)
  return(outvar)
}
```

```

recodevar <- function (var,oldcode,newcode) {
  tmp.v <- var
  nc.tmp <- length(oldcode)
  for (i in (1:nc.tmp)) {tmp.v[(var==oldcode[i])]=newcode[i]}
  if (is.factor(tmp.v)) {tmp.v1<-as.numeric(as.character(tmp.v))} else {tmp.v1<-
as.numeric(tmp.v)}
  rm(tmp.v); return(tmp.v1)
}

```

```

attach(EmpowerStatsR)
sink("C:/Users/15949/Desktop/Obesity/datastep/PROJ3_datastep.lst")
print("Creating new variable: SII.Q4")
SII.Q4<- rankvar(SII,4)
EmpowerStatsR<-cbind(EmpowerStatsR,SII.Q4)
print("Creating new variable: OBESITY.NEW")
OBESITY.NEW<- recodevar(OBESITY,c(1,2),c(1,0))
EmpowerStatsR<-cbind(EmpowerStatsR,OBESITY.NEW)
rm(SII.Q4,OBESITY.NEW)
detach(EmpowerStatsR)
sink()
vname<-c("_N_", "_STAT_", "_TOTAL_", "SEQN", "GENDER", "GENDER.1", "GENDER.2")
vname<-c(vname, "AGE", "RACE", "RACE.1", "RACE.2", "RACE.3", "RACE.4")
vlabel<-c(vlabel, "AGE", "RACE", " 1", " 2", " 3", " 4")
vname<-
c(vname, "EDUCATION.LEVEL", "EDUCATION.LEVEL.1", "EDUCATION.LEVEL.2", "EDUC
ATION.LEVEL.3")
vlabel<-c(vlabel, "EDUCATION.LEVEL", " 1", " 2", " 3")
vname<-
c(vname, "MARITAL.STATUS", "MARITAL.STATUS.1", "MARITAL.STATUS.2", "MARITAL.S
TATUS.3")
vlabel<-c(vlabel, "MARITAL.STATUS", " 1", " 2", " 3")
vname<-c(vname, "WTMECPRP", "RATIO.OF.FAMILY.INCOME.TO.POVERTY")
vlabel<-c(vlabel, "WTMECPRP", "RATIO.OF.FAMILY.INCOME.TO.POVERTY")
vname<-
c(vname, "PIR", "PIR.1", "PIR.2", "PIR.3", "LYMPHOCYTE.NUMBER..1000.CELLS.UL.")
vlabel<-c(vlabel, "PIR", " 1", " 2", " 3", "LYMPHOCYTE.NUMBER..1000.CELLS.UL.")
vname<-
c(vname, "NEUTROPHILS.NUM..1000.CELL.UL.", "PLATELET.COUNT..1000.CELLS.UL.")
vlabel<-
c(vlabel, "NEUTROPHILS.NUM..1000.CELL.UL.", "PLATELET.COUNT..1000.CELLS.UL.")
vname<-c(vname, "SII", "LGSII", "SMOKE", "SMOKE.1", "SMOKE.2", "SMOKE.3")

```

```

vlabel<-c(vlabel,"SII","LGSII","SMOKE"," 1"," 2"," 3")
vname<-c(vname,"SLEEP.DISORDER","SLEEP.DISORDER.1","SLEEP.DISORDER.2")
vlabel<-c(vlabel,"SLEEP.DISORDER"," 1"," 2")
vname<-
c(vname,"VIGOROUS.RECREATIONAL.ACTIVITIES","VIGOROUS.RECREATIONAL.ACTI
VITIES.1","VIGOROUS.RECREATIONAL.ACTIVITIES.2")
vlabel<-c(vlabel,"VIGOROUS.RECREATIONAL.ACTIVITIES"," 1"," 2")
vname<-
c(vname,"DAYS.VIGOROUS.RECREATIONAL.ACTIVITIES","DAYS.VIGOROUS.RECREAT
IONAL.ACTIVITIES.1","DAYS.VIGOROUS.RECREATIONAL.ACTIVITIES.2","DAYS.VIGO
ROUS.RECREATIONAL.ACTIVITIES.3","DAYS.VIGOROUS.RECREATIONAL.ACTIVITIE
S.4","DAYS.VIGOROUS.RECREATIONAL.ACTIVITIES.5","DAYS.VIGOROUS.RECREATI
ONAL.ACTIVITIES.6","DAYS.VIGOROUS.RECREATIONAL.ACTIVITIES.7")
vlabel<-c(vlabel,"DAYS.VIGOROUS.RECREATIONAL.ACTIVITIES"," 1"," 2"," 3","
4"," 5"," 6"," 7")
vname<-c(vname,"MINUTES.VIGOROUS.RECREATIONAL.ACTIVITIES")
vlabel<-c(vlabel,"MINUTES.VIGOROUS.RECREATIONAL.ACTIVITIES")
vname<-
c(vname,"MODERATE.RECREATIONAL.ACTIVITIES","MODERATE.RECREATIONAL.AC
TIVITIES.1","MODERATE.RECREATIONAL.ACTIVITIES.2")
vlabel<-c(vlabel,"MODERATE.RECREATIONAL.ACTIVITIES"," 1"," 2")
vname<-
c(vname,"DAYS.MODERATE.RECREATIONAL.ACTIVITIES","DAYS.MODERATE.RECRE
ATIONAL.ACTIVITIES.1","DAYS.MODERATE.RECREATIONAL.ACTIVITIES.2","DAYS.M
ODERATE.RECREATIONAL.ACTIVITIES.3","DAYS.MODERATE.RECREATIONAL.ACTIV
ITIES.4","DAYS.MODERATE.RECREATIONAL.ACTIVITIES.5","DAYS.MODERATE.RECR
EATIONAL.ACTIVITIES.6","DAYS.MODERATE.RECREATIONAL.ACTIVITIES.7","DAYS.
MODERATE.RECREATIONAL.ACTIVITIES.99")
vlabel<-c(vlabel,"DAYS.MODERATE.RECREATIONAL.ACTIVITIES"," 1"," 2"," 3","
4"," 5"," 6"," 7"," 99")
vname<-c(vname,"MINUTES.MODERATE.RECREATIONAL.ACTIVITIES")
vlabel<-c(vlabel,"MINUTES.MODERATE.RECREATIONAL.ACTIVITIES")
vname<-c(vname,"ACTIVITY","ACTIVITY.1","ACTIVITY.2","ACTIVITY.3")
vlabel<-c(vlabel,"ACTIVITY"," 1"," 2"," 3")
vname<-c(vname,"DRINK","DRINK.1","DRINK.2","BODY.MASS.INDEX..KG.M..2.")
vlabel<-c(vlabel,"DRINK"," 1"," 2","BODY.MASS.INDEX..KG.M..2.")
vname<-c(vname,"WAIST.CIRCUMFERENCE..CM.,""ENERGY..KCAL.")
vlabel<-c(vlabel,"WAIST.CIRCUMFERENCE..CM.,""ENERGY..KCAL.")
vname<-c(vname,"OBESITY","OBESITY.1","OBESITY.2","ENERGY..1000KCAL.")
vlabel<-c(vlabel,"OBESITY"," 1"," 2","ENERGY..1000KCAL.")
vname<-c(vname,"SII.Q4","SII.Q4.0","SII.Q4.1","SII.Q4.2","SII.Q4.3")
vname<-c(vname,"OBESITY.NEW","OBESITY.NEW.0","OBESITY.NEW.1")
vlabel<-c(vlabel,"OBESITY NEW"," 0"," 1")
slt.vname<-c()

```

```

library(gdata,lib.loc=R.LibLocation)
library(geepack,lib.loc=R.LibLocation)
library(mgecv,lib.loc=R.LibLocation)

ofname<-"PROJ3_4_tbl1";
WD<-EmpowerStatsR; wd.subset="";
svy.DSN.YN <- FALSE;
weights<-1;weights.var <- NA;
WD<-cbind(WD,weights); WD<-WD[!is.na(weights),];
attach(WD)
subjvname<-NA;
yv<-cbind(OBESITY.NEW);
yvname<-c('OBESITY.NEW');
yvar<-c('OBESITY_NEW');
ydist<-c('binomial');
ylink<-c('logit');
ylv<-c(2);
xv<-cbind(LGSII);
xvname<-c('LGSII');
xvar<-c('LGSII');
xlv<-c(0);
sxf<-c(NA,0)[-1];
sv<-
cbind(GENDER,AGE,RACE,EDUCATION.LEVEL,MARITAL.STATUS,PIR,SMOKE,SLEEP.D
ISORDER,ACTIVITY,DRINK,ENERGY..1000KCAL.);
svname<-
c('GENDER','AGE','RACE','EDUCATION.LEVEL','MARITAL.STATUS','PIR','SMOKE','SLEEP
.DISORDER','ACTIVITY','DRINK','ENERGY..1000KCAL. ');
svar<-
c('GENDER','AGE','RACE','EDUCATION_LEVEL','MARITAL_STATUS','PIR','SMOKE','SLEE
P_DISORDER','ACTIVITY','DRINK','ENERGY__1000KCAL_ ');
sdf<-c(NA,0,0,0,0,0,0,0,0,0,0,0)[-1];
slv<-c(2,0,4,3,3,3,3,2,3,2,0);
av<-cbind(GENDER,AGE,RACE);
avname<-c('GENDER','AGE','RACE');
if (!is.na(avname[1])) avlbl<-vlabel[match(avname, vname)];
nadj<-length(avname);alv<-c(2,0,4);
saf<-c(NA,0,0,0)[-1];
timev<-NA; timevname<-NA;
bv<-NA; bvar<-NA;
colv<-NA; colvname<-NA;
v.start<-NA; vname.start<-NA;
v.stop<-NA; vname.stop<-NA;

```

```

par1<-1;dec<-2;parm<-c(1,NA, 1,1, 0);
if (!exists("pdfwd")) pdfwd<-6;
if (!exists("pdfht")) pdfht<-6;
##R package## gdata geepack mgcv ##R package##;
pvformat<-function(p,dec) {
  pp <- sprintf(paste("%.",dec,"f",sep=""),as.numeric(p))
  if (is.matrix(p)) {pp<-matrix(pp, nrow=nrow(p)); colnames(pp)<-colnames(p);rownames(pp)<-
rownames(p);}
  lw <- paste("<",substr("0.0000000000",1,dec+1),"1",sep="");
  pp[as.numeric(p)<(1/10^dec)]<-lw
  return(pp)
}
numfmt<-function(p,dec) {
  if (is.list(p)) p<-as.matrix(p)
  pp <- sprintf(paste("%.",dec,"f",sep=""),as.numeric(p))
  if (is.matrix(p)) {pp<-matrix(pp, nrow=nrow(p));colnames(pp)<-colnames(p);rownames(pp)<-
rownames(p);}
  pp[as.numeric(p)>10000000]<- "inf."
  pp[is.na(p) | gsub(" ", "", p)==""]<- ""
  pp[p=="-Inf"]<-"-Inf"
  pp[p=="Inf"]<- "Inf"
  return(pp)
}
varstats<-function(var,vlvl,dec) {
  if (length(vlvl)==1 & vlvl[1]==0) {

return(paste(numfmt(mean(var,na.rm=TRUE),dec),numfmt(sd(var,na.rm=TRUE),dec),sep="+"))
  } else {
    a<-table(var)
    b<-matrix(paste(a, " (", numfmt(a/sum(a)*100,dec), "%)",sep=""),ncol=1)
    return(c(" ",b[match(vlvl,names(a))]))
  }
}
mat2htmltable<-function(mat) {
  t1<- apply(mat,1,function(z) paste(z,collapse="</td><td>"))
  t2<- paste("<tr><td>",t1,"</td></tr>")
  return(paste(t2,collapse=" "))
}
setgam<-function(fml,yi) {
  if (ydist[yi]=="") ydist[yi]<-"gaussian"
  if (ydist[yi]=="exact") ydist[yi]<-"binomial"
  if (ydist[yi]=="breslow") ydist[yi]<-"binomial"
  if (ydist[yi]=="gaussian") mdl<-try(gam(formula(fml),weights=wdtmp$weights,data=wdtmp,

```

```

family=gaussian(link="identity")))
  if (ydist[yi]=="binomial") mdl<-try(gam(formula(fml),weights=wdtmp$weights,data=wdtmp,
family=binomial(link="logit")))
  if (ydist[yi]=="poisson") mdl<-try(gam(formula(fml),weights=wdtmp$weights,data=wdtmp,
family=poisson(link="log")))
  if (ydist[yi]=="gamma") mdl<-try(gam(formula(fml),weights=wdtmp$weights,data=wdtmp,
family=Gamma(link="inverse")))
  if (ydist[yi]=="negbin") mdl<-try(gam(formula(fml),weights=wdtmp$weights,data=wdtmp,
family=negbin(c(1,10), link="log")))
  return(mdl)
}
setgee<-function(fml,yi) {
  if (ydist[yi]=="") ydist[yi]<-"gaussian"
  if (ydist[yi]=="exact") ydist[yi]<-"binomial"
  if (ydist[yi]=="breslow") ydist[yi]<-"binomial"
  if (ydist[yi]=="gaussian") mdl<-
try(geeglm(formula(fml),id=wdtmp[,subjvname],corstr=gee.TYPE,family="gaussian",weights=w
dtmp$weights,data=wdtmp))
  if (ydist[yi]=="binomial") mdl<-
try(geeglm(formula(fml),id=wdtmp[,subjvname],corstr=gee.TYPE,family="binomial",weights=w
dtmp$weights,data=wdtmp))
  if (ydist[yi]=="poisson") mdl<-
try(geeglm(formula(fml),id=wdtmp[,subjvname],corstr=gee.TYPE,family="poisson",weights=wd
tmp$weights,data=wdtmp))
  if (ydist[yi]=="gamma") mdl<-
try(geeglm(formula(fml),id=wdtmp[,subjvname],corstr=gee.TYPE,family="Gamma",weights=wd
tmp$weights,data=wdtmp))
  if (ydist[yi]=="negbin") mdl<-
try(geeglm.nb(formula(fml),id=wdtmp[,subjvname],corstr=gee.TYPE,weights=wdtmp$weights,da
ta=wdtmp))
  return(md)
}
setglm<-function(fml,yi) {
  if (ydist[yi]=="") ydist[yi]<-"gaussian"
  if (ydist[yi]=="exact") ydist[yi]<-"binomial"
  if (ydist[yi]=="breslow") ydist[yi]<-"binomial"
  if (ydist[yi]=="gaussian") mdl<-
try(glm(formula(fml),family="gaussian",weights=wdtmp$weights,data=wdtmp))
  if (ydist[yi]=="binomial") mdl<-
try(glm(formula(fml),family="binomial",weights=wdtmp$weights,data=wdtmp))
  if (ydist[yi]=="poisson") mdl<-
try(glm(formula(fml),family="poisson",weights=wdtmp$weights,data=wdtmp))
  if (ydist[yi]=="gamma") mdl<-
try(glm(formula(fml),family="Gamma",weights=wdtmp$weights,data=wdtmp))

```



```

    if (ydist[yi]=="negbin") md<-try(glm.nb(formula(fml),weights=wdtmp$weights,data=wdtmp))
    return(md)
  }
mdl2oo<-function(mdl, xxname, opt) {
  if (is.na(mdl[[1]][1])) return(list(rep("",times=length(xxname)), ""))
  if (substr(mdl[[1]][1],1,5)=="Error") return(list(rep("",times=length(xxname)), ""))
  gs<-summary(mdl); print(mdl$formula); print(gs)
  if (opt=="gam") {gsparm <- gs$p.table;tmpn<-gs$n;
  } else {gsparm <- gs$coefficients;tmpn <- sum(gs$df[c(1,2)]);}
  gsp<-gsparm[match(xxname,rownames(gsparm)),]
  if (length(xxname)==1) {beta<-gsp[1]; se<-gsp[2]; pv<-gsp[4];
  } else {beta<-gsp[,1]; se<-gsp[,2]; pv<-gsp[,4]; }
  ci1<- beta-1.96*se; ci2<- beta+1.96*se
  pvx<-substr(rep("****",length(pv)),1,(pv<=0.05)+(pv<=0.01)+(pv<=0.001))
  if (colprn==3) {pvv<-pvx;} else {pvv<-pvformat(pv,dec+2);}
  if ((colprn!=2) & (gs$family[[2]]=="log" | gs$family[[2]]=="logit")) {
    o1<-paste(numfmt(exp(beta),dec)," (" ,numfmt(exp(ci1),dec),"
,numfmt(exp(ci2),dec),")",sep="")
  } else {
    if (colprn<3) {o1<-paste(numfmt(beta,dec), " (" ,numfmt(ci1,dec),"
,numfmt(ci2,dec),")",sep="")
  } else {o1<-paste(numfmt(beta,dec), "+",numfmt(se,dec),sep="");}
  }
  o1<-paste(o1,ppv); o1[is.na(beta)]<-NA
  if (length(xxname)>1) {
    if (gs$family[[2]]=="log" | gs$family[[2]]=="logit") {
      o1[is.na(o1) & substr(xxname,1,7)=="factor("]<-"1.0"
    } else {o1[is.na(o1) & substr(xxname,1,7)=="factor("]<-"0";}
    o1[is.na(o1)]<-"";
  }
  return(list(o1,tmpn))
}
recodevar <- function (var,oldcode,newcode) {
  tmp.v <- var
  nc.tmp <- length(oldcode)
  for (i in (1:nc.tmp)) {tmp.v[(var==oldcode[i])]=newcode[i]}
  if (is.factor(tmp.v)) {tmp.v1<-as.numeric(as.character(tmp.v))} else {tmp.v1<-
as.numeric(tmp.v)}
  rm(tmp.v); return(tmp.v1)
}
rankvar <- function(var, num) {
  qprobs <- 1/num
  if (num>2) {for (i in (2:(num-1))) {qprobs <- c(qprobs, 1/num * i) }}
  outvar <- rep(0, times=length(var))
}

```

```

    outvar[is.na(var)] <- NA
    cutpoints <- quantile(var,probs=qprobs, na.rm=TRUE)
    for (k in (1:length(cutpoints))) { outvar[var>=cutpoints[k]] <- k; }
    return(outvar)
}
removeNA<-function(i,j,m,wdf) {
  vvv<-c(yvname[i],adjvv[[m]],subjvname,colvname,bvar,vname.start,vname.stop,timevname);
  if (j<=nx) {vvv<-c(vvv,xvname[j]);} else {vvv<-c(vvv,xvname);}
  vvv<-vvv[!is.na(vvv)]; vvv<-vvv[vvv>" "]
  tmp<-is.na(wdf[,vvv]);
  return(wdf[apply(tmp,1,sum)==0,])
}
vlabelN<-(substr(vlabel,1,1)==" ");
vlabelZ<-vlabel[vlabelN];vlabelV<-vlabel[!vlabelN]
vnameV<-vname[!vlabelN];vnameZ<-vname[vlabelN]
w<-c("<html><head>","<meta          http-equiv=\"Content-Type\"          content=\"text/html\"
charset=\"gb2312\" /></head><body>")
if (!is.na(avname[1])) {
  if (sum((saf=="s" | saf=="S") & alv>0)>0) w<-c(w,"<br>Spline smoothing only applies for
continuous variables")
  if (!is.na(subjvname) & (sum((saf=="s" | saf=="S") & alv==0)>0)) w<-c(w,"<br>Generalized
estimate equation could not be used with spline smoothing terms")
}
if (!is.na(svname[1])) {
  if (sum((sdf=="s" | sdf=="S") & slv>0)>0) w<-c(w,"<br>Spline smoothing only applies for
continuous variables")
  if (!is.na(subjvname) & (sum((sdf=="s" | sdf=="S") & slv==0)>0)) w<-c(w,"<br>Generalized
estimate equation could not be used with spline smoothing terms")
}
allvname<-
c(yvname,xvname,colvname,bvar,avname,svname,subjvname,vname.start,vname.stop,timevname,
"weights");
allvname<-allvname[!is.na(allvname)]
WD<-WD[,allvname];
if (!is.na(subjvname)) WD<-WD[order(WD[,subjvname]),]
if (!is.na(sxf[1])) {
  if (sum(sxf>1 & xlv>0)>0) w<-c(w,"Categorizing only applies to continuous variables");
  if (sum(sxf>1 & xlv==0)>0) {
    t.xname<-NA;t.xlv<-NA; nx<-length(xvname)
    for (i in 1:nx) {
      if (sxf[i]>1 & xlv[i]==0) {
        tmp.Xi<- rankvar(WD[,xvname[i]],sxf[i])
        tmp.newcode <- tapply(WD[,xvname[i]],tmp.Xi,function(z) median(z,na.rm=TRUE))
        tmp.low <- tapply(WD[,xvname[i]],tmp.Xi,function(z) min(z,na.rm=TRUE))

```

```

tmp.upp <- tapply(WD[,xvname[i]],tmp.Xi,function(z) max(z,na.rm=TRUE))
tmp.Xi2<- recodevar(tmp.Xi,(1:sxf[i])-1,tmp.newcode)
tmp.Xi<-cbind(tmp.Xi,tmp.Xi2)
tmp.NM<-paste(xvname[i],c("grp","grp.cont"),sep=".")
colnames(tmp.Xi)<-tmp.NM
WD<-cbind(WD,tmp.Xi)
t.xname<-c(t.xname,tmp.NM)
t.xlv<-c(t.xlv,sxf[i],0)
vnameV<-c(vnameV,tmp.NM)
vlabelV<-c(vlabelV,paste(vlabelV[vnameV==xvname[i]],c("group","group trend")))
vnameZ<-c(vnameZ,paste(tmp.NM[1],(1:sxf[i])-1,sep="."))
vlabelZ<-c(vlabelZ,paste(tmp.low,"-",tmp.upp))
} else {
  t.xname<-c(t.xname,xvname[i]); t.xlv<-c(t.xlv,xlv[i])
}
}
xvname<-t.xname[-1]; xlv<-t.xlv[-1];
}
}
rm(xv,yv,bv,av,sv,colv,v.start,v.stop)
if (!is.na(subjvname)) {
  if (!is.na(avname[1])) saf<-rep(0,length(saf));
  if (!is.na(svname[1])) sdf<-rep(0,length(sdf));
  WD<-WD[order(WD[,subjvname]),];
}
fmlm<-" "; fmlb<-"Non-adjusted"; tmp<-""; adjv<-list(NA); adjvb<-"None";
fmlp<-ifelse(!is.na(subjvname), "gee", "glm");
na=0; avb="" ; smoothav<-0; nadjm<-0
if (!is.na(avname[1])) {
  na<-length(avname)
  avb<-vlabelV[match(avname,vnameV)];
  avname_ <- avname
  smoothavi<-((saf=="s" | saf=="S") & alv==0)
  smoothav<-sum(smoothavi)
  smoothavname<-avname[smoothavi]
  avname_[smoothavi]<-paste("s(",avname[smoothavi],")",sep="")
  avb1<-avb
  avb1[smoothavi]<-paste(avb[smoothavi],"(Smooth)",sep="")
  avname_[alv>0]<-paste("factor(",avname[alv>0],")",sep="")
  fmlm<-c(fmlm,paste("+",paste(avname_,collapse="+")))
  fmlb<-c(fmlb,"Adjust")
  nadjm<-nadjm+1; tmp<-c(tmp,"I"); adjvv[[nadjm+1]]<-avname;
  adjvb<-c(adjvb, paste(avb1, collapse="; "))
  fmlp<-c(fmlp,ifelse(!is.na(subjvname), "gee", ifelse(smoothav>0, "gam", "glm")))

```



```

if (is.na(par1)) par1<-1;
if (par1>1) {
  tmp1<-xxname_ [[1]]; tmp2<-xxlbl_ [[1]]
  for (j in 2:nx) {tmp1<-c(tmp1,xxname_ [[j]]); tmp2<-c(tmp2,xxlbl_ [[j]]);}
  xxname_ [[nx+1]]<-tmp1; xxlbl_ [[nx+1]]<-tmp2;
  xvname_ <-c(xvname_ ,paste(xvname_ ,collapse="+"))
}
contx<-(sum(xlv>0)==0)
if (par1==3 & !is.na(bvar)) {w<-c(w,"<br>Column stratified variable was ignored"); bvar<-NA;
bvname<-NA;}

if (is.na(bvar) & !is.na(colvname) & nmdl==1 & par1!=3) {if ((ny==1) | (nx==1 & contx)) {bvar<-
colvname; colvname<-NA;}}
if (is.na(colvname)) {
  nclv<-1; clvb<-"Total"; clvb_ <-"Total"
} else {
  clv<-levels(factor(WD[,colvname])); nclv<-length(clv)+1
  clvb_ <-vlabelZ[match(paste(colvname,".",clv,sep=""),vnameZ)];          clvb_[is.na(clvb_)]<-
clv[is.na(clvb_)];
  clvb<-c(paste(vlabelV[vnameV==colvname],clvb_ ,sep="="),"Total");
  clvb_ <-c(clvb_ ,"Total")
  WD<-WD[!is.na(WD[,colvname]),]
}
if (is.na(bvar)) {
  blvb<-"Total"; blvb_ <-"Total"
} else {
  blv<-levels(factor(WD[,bvar])); nblv<-length(blv)+1
  blvb_ <-vlabelZ[match(paste(bvar,".",blv,sep=""),vnameZ)];          blvb_[is.na(blvb_)]<-
blv[is.na(blvb_)];
  blvb<-c(paste(vlabelV[vnameV==bvar],blvb_ ,sep="="),"Total");
  blvb_ <-c(blvb_ ,"Total")
  WD<-WD[!is.na(WD[,bvar]),]
}
aa<-c(1,2,3,4)
for (i in 1:4) {
  for (j in c(1:4)[-i]) {
    for (k in c(1:4)[-c(i,j)]) aa<-rbind(aa,c(i,j,k,c(1:4)[-c(i,j,k)]))
  }
}
if (is.na(parm[4])) parm[4]<-1
rord<-aa[parm[4],]
if (!is.na(bvar)) {prn<-"S";
} else {
  if (parm[4]>1) {

```

```

rordc<-ifelse(rord[4]==1,3,4)
prn<-c("G","Y","M","X")[rord[rordc]]
if (prn=="X") {
  if (!contx & nx>1) prn<-ifelse(nmdl>1, "M", ifelse(ny>nx & contx, "X", "Y"))
  if (!contx & nx==1) prn<-"CX"
  if      (par1==2)      {tmp<-ifelse(rordc==4,ifelse(rord[3]==1,2,3),2);      prn<-
c("G","Y","M","X")[rord[tmp]];}
  }
} else {
  prn<-ifelse(nmdl>1, "M", ifelse(ny>nx & contx, "X", "Y"))
  if (par1==2) prn<-ifelse(nmdl>1, "M", "Y")
}
if (par1==3) prn<-"UM"
}
colprn<-parm[3];
sink(paste(ofname,".lst",sep=""))
if (par1==2) {xbgn<-nx+1; xend<-nx+1;} else {xbgn<-1; xend<-nx;}
if (prn=="Y") {
  tt<-c(0,0,0,0,"Exposure",yb); nn<-c(0,0,0,0,yb);
  for (k in (1:nclv)) {
    wdtmp0<-WD;
    if (!is.na(colvname)) {
      if (k<nclv) wdtmp0<-WD[WD[,colvname]==clv[k],];
      print(paste("Stratified by",colvname, ":", clvb[k]))
    }
    for (m in 1:nmdl) {
      for (j in (xbgn:xend)) {
        colj<-cbind(k,0,m,j,xxlbl_[[j]])
        nnj <-c(k,0,m,j)
        for (i in (1:ny)) {
          fml<-paste(yvname[i],"~",xvname_[j],fmlm[m]);
          wdtmp<-removeNA(i,j,m,wdtmp0)
          if (!is.na(colvname)) {if (k==nclv) fml<-paste(fml,"+factor(",colvname,")",sep="");}
          if (fmlp[m]=="gam") tmp.mdl<-setgam(fml,i)
          if (fmlp[m]=="gee") tmp.mdl<-setgee(fml,i)
          if (fmlp[m]=="glm") tmp.mdl<-setglm(fml,i)
          tmppooi<-mdl2oo(tmp.mdl,xxname_[[j]],fmlp[m])
          colj<-cbind(colj,tmppooi[[1]]); nnj<-c(nnj,tmppooi[[2]])
        }
        tt<-rbind(tt,colj); nn<-rbind(nn,nnj)
      }
    }
  }
}
}
}
}

```

```

if (prn=="S") {
  tt<-c(0,0,0,0,"Exposure",blvb); nn<-c(0,0,0,0,blvb);
  for (k in (1:nclv)) {
    wdtmp0<-WD;
    if (!is.na(colvname)) {
      if (k<nclv) wdtmp0<-WD[WD[,colvname]==clv[k],];
      print(paste("Stratified by",colvname, ":", clvb[k]))
    }
    for (i in (1:ny)) {
      for (m in 1:nmdl) {
        for (j in (xbgn:xend)) {
          colj<-cbind(k,i,m,j,xxlbl_[[j]]);
          nnj <- c(k,i,m,j)
          for (b in (1:nblv)) {
            print(paste("Stratified by",bvar, ":", blvb[b]))
            fml<-paste(yvname[i],"~",xvname_[j],fmlm[m]);
            if (b<nblv) {
              wdtmp1<-wdtmp0[wdtmp0[,bvar]==blv[b],];
            } else {
              wdtmp1<-wdtmp0; fml<-paste(fml,"+factor(",bvar,")",sep="");
            }
            wdtmp<-removeNA(i,j,m,wdtmp1)
            if (!is.na(colvname)) {if (k==nclv) fml<-paste(fml,"+factor(",colvname,")",sep="");}
            if (fmlp[m]=="gam") tmp.mdl<-setgam(fml,i)
            if (fmlp[m]=="gee") tmp.mdl<-setgee(fml,i)
            if (fmlp[m]=="glm") tmp.mdl<-setglm(fml,i)
            tmppoi<-mdl2oo(tmp.mdl,xxname_[[j]],fmlp[m])
            colj<-cbind(colj,tmppoi[[1]]); nnj<-c(nnj,tmppoi[[2]])
          }
          tt<-rbind(tt,colj); nn<-rbind(nn,nnj)
        }
      }
    }
  }
}

if (prn=="M") {
  tt<-c(0,0,0,0,"Exposure",fmlb); nn<-c(0,0,0,0,fmlb)
  for (k in (1:nclv)) {
    wdtmp0<-WD;
    if (!is.na(colvname)) {
      if (k<nclv) wdtmp0<-WD[WD[,colvname]==clv[k],];
      print(paste("Stratified by",colvname, ":", clvb[k]))
    }
    for (i in 1:ny) {

```

```

for (j in xbg:nxend) {
  colj<-cbind(k,i,0,j,xxlbl_[[j]]); nnj<-c(k,i,0,j)
  for (m in 1:nmdl) {
    fml<-paste(yvname[i],"~",xvname_[j],fmlm[m]);
    wdtmp<-removeNA(i,j,m,wdtmp0)
    if (!is.na(colvname)) {if (k==nclv) fml<-paste(fml,"+factor(",colvname,")",sep="");}
    if (fmlp[m]=="gam") tmp.mdl<-setgam(fml,i)
    if (fmlp[m]=="gee") tmp.mdl<-setgee(fml,i)
    if (fmlp[m]=="glm") tmp.mdl<-setglm(fml,i)
    tmppoi<-mdl2oo(tmp.mdl,xxname_[[j]],fmlp[m])
    colj<-cbind(colj,tmppoi[[1]]); nnj<-c(nnj,tmppoi[[2]])
  }
  tt<-rbind(tt,colj); nn<-rbind(nn,nnj)
}
}
}
}
if (prn=="X") {
  tt<-c(0,0,0,0,"Outcome",xb); nn<-c(0,0,0,0,xb);
  for (k in (1:nclv)) {
    wdtmp0<-WD;
    if (!is.na(colvname)) {
      if (k<nclv) wdtmp0<-WD[WD[,colvname]==clv[k],];
      print(paste("Stratified by",colvname, ":", clvb[k]))
    }
    for (m in 1:nmdl) {
      for (i in (1:ny)) {
        colj<-cbind(k,i,m,0,yb[i])
        nnj <-c(k,i,m,0)
        for (j in (1:nx)) {
          fml<-paste(yvname[i],"~",xvname_[j],fmlm[m]);
          wdtmp<-removeNA(i,j,m,wdtmp0)
          if (!is.na(colvname)) {if (k==nclv) fml<-paste(fml,"+factor(",colvname,")",sep="");}
          if (fmlp[m]=="gam") tmp.mdl<-setgam(fml,i)
          if (fmlp[m]=="gee") tmp.mdl<-setgee(fml,i)
          if (fmlp[m]=="glm") tmp.mdl<-setglm(fml,i)
          tmppoi<-mdl2oo(tmp.mdl,xxname_[[j]],fmlp[m])
          colj<-cbind(colj,tmppoi[[1]]); nnj<-c(nnj,tmppoi[[2]])
        }
        tt<-rbind(tt,colj); nn<-rbind(nn,nnj)
      }
    }
  }
}
}
}
}

```



```

if (prn=="CX") {
  tt<-c(0,0,0,0,"Outcome",xxlbl_[[1]][-1]); nn<-c(0,0,0,0,xb[1]);
  nxl<-length(xxlbl_[[1]])-1
  for (k in (1:nclv)) {
    wdtmp0<-WD;
    if (!is.na(colvname)) {
      if (k<nclv) wdtmp0<-WD[WD[,colvname]==clv[k],];
      print(paste("Stratified by",colvname, ":", clvb[k]))
    }
    for (m in 1:nmdl) {
      for (i in (1:ny)) {
        colj<-c(k,i,m,0,yb[i])
        nnj <-c(k,i,m,0)
        fml<-paste(yvname[i],"~",xvname_[1],fmlm[m]);
        wdtmp<-removeNA(i,1,m,wdtmp0)
        if (!is.na(colvname)) {if (k==nclv) fml<-paste(fml,"+factor(",colvname,")",sep="");}
        if (fmlp[m]=="gam") tmp.mdl<-setgam(fml,i)
        if (fmlp[m]=="gee") tmp.mdl<-setgee(fml,i)
        if (fmlp[m]=="glm") tmp.mdl<-setglm(fml,i)
        tmppoi<-mdl2oo(tmp.mdl,xxname_[[1]],fmlp[m])
        colj<-c(colj,tmppoi[[1]][-1]); nnj<-c(nnj,tmppoi[[2]])
        tt<-rbind(tt,colj); nn<-rbind(nn,nnj)
      }
    }
  }
}

if (prn=="UM") {
  tt<-c(0,0,0,0,"Exposure","Univariable","Multivariable");
  c(0,0,0,0,"Univariable","Multivariable")
  for (k in (1:nclv)) {
    wdtmp0<-WD;
    if (!is.na(colvname)) {
      if (k<nclv) wdtmp0<-WD[WD[,colvname]==clv[k],];
      print(paste("Stratified by",colvname, ":", clvb[k]))
    }
    for (i in 1:ny) {
      for (m in 1:nmdl) {
        colm<-rep(NA,6); nnm<-rep(NA,5)
        for (j in 1:(nx+1)) {
          colj<-cbind(k,i,m,j,xxlbl_[[j]]); nnj<-c(k,i,m,j)
          fml<-paste(yvname[i],"~",xvname_[j],fmlm[m]);
          wdtmp<-removeNA(i,j,m,wdtmp0)
          if (!is.na(colvname)) {if (k==nclv) fml<-paste(fml,"+factor(",colvname,")",sep="");}
          if (fmlp[m]=="gam") tmp.mdl<-setgam(fml,i)

```

```

    if (fmlp[m]=="gee") tmp.mdl<-setgee(fml,i)
    if (fmlp[m]=="glm") tmp.mdl<-setglm(fml,i)
    tmp.ooi<-mdl2oo(tmp.mdl,xxname_[[j]],fmlp[m])
    colj<-cbind(colj,tmp.ooi[[1]]); nnj<-c(nnj,tmp.ooi[[2]])
    if (j<=nx) {colm<-rbind(colm,colj); nnm<-rbind(nnm,nnj);
    } else {colm<-cbind(colm[-1,],tmp.ooi[[1]]); nnm<-cbind(nnm[-1,],tmp.ooi[[2]])};
  }
  tt<-rbind(tt,colm); nn<-rbind(nn,nnm)
}
}
}
}
}
sink()
if (!contx & prn!="CX") rord<-c(rord[rord!=4],4)
if (prn=="X" | prn=="CX") rord<-rord[rord!=4]
if (prn=="Y") rord<-rord[rord!=2]
if (prn=="M") rord<-rord[rord!=3]
if (nx==1 & contx) rord<-rord[rord!=4]
if (nmdl==1) rord<-rord[rord!=3]
if (ny==1) rord<-rord[rord!=2]
if (is.na(colvname)) rord<-rord[rord!=1]
if (length(rord)==0) rord<-1
nrr<-length(rord)
for (i in nrr:1) {nn<-nn[order(as.numeric(nn[,rord[i]])),];tt<-tt[order(as.numeric(tt[,rord[i]])),];}
if (nn[2,4]>0) {nn[,4]<-c("Exposure",xb[as.numeric(nn[-1,4])]); } else {nn<-nn[,-4];}
if (nn[2,3]>0) {nn[,3]<-c("Model",fmlb[as.numeric(nn[-1,3])]); } else {nn<-nn[,-3];}
if (nn[2,2]>0) {nn[,2]<-c("Outcome",yb[as.numeric(nn[-1,2])]); } else {nn<-nn[,-2];}
if (!is.na(colvname)) {nn[,1]<-c(vlabel[vname==colvname],clvb_[as.numeric(nn[-1,1])]); } else
{nn<-nn[,-1];}
tb<-matrix(as.numeric(tt[,c(1:4)]),ncol=4);
if (!is.na(colvname)) {tt[,1]<-c(vlabelV[vnameV==colvname],clvb[tb[-1,1]]);}
if (ny>1) {tt[,2]<-c("Outcome",yb[tb[-1,2]]);}
if (nmdl>1) {tt[,3]<-c("Model",fmlb[tb[-1,3]]);}
nrr1<-nrr-1; oo<-tt[1,]; nc<-ncol(tt)-5; nr<-nrow(tt)
for (i in 2:nr) {
  if (nrr>1) {
    for (j in 1:nrr1) {
      if (tb[i,rord[j]]!=tb[i-1,rord[j]]) oo<-rbind(oo,c(rep(tt[i,rord[j]],5),rep(" ",nc)))
    }
  }
  oo<-rbind(oo,tt[i,])
}
if (rord[nrr]!=4 & tt[1,rord[nrr]]!="0") {oo<-cbind(oo[,rord[nrr]],oo[,-(1:5)]); } else {oo<-oo[,-(1:4)]}

```

```
w<-c(w,paste("<h2>", title, "</h2>"))
w<-c(w,"<br><table border=3>", mat2htmltable(oo), "</table>")
prnpt<-c("β (95%CI) Pvalue / OR (95%CI) Pvalue", "β (95%CI) Pvalue", "β+se / OR (95%CI)
**P<0.05 ***P<0.01 ****P<0.001")
```

```
for (m in 1:nmdl) w<-c(w,paste("<br>",fmlb[m],"model adjust for:", adjvb[m]))
if (smoothav>0 | smoothsv>0) w<-c(w,". Generalized additive models were applied")
if (!is.na(subjvname)) w<-c(w, paste("<br>Generalized estimate equation were used, subject ID=",
subjvname, "(", gee.TYPE, ")",sep=""))
```

```
R.Version4RUN<-343;
R.LibLocation <- "C:/Users/15949/AppData/Roaming/EmpowerRCH/R343/library"
##### Regarding ALL Following R Functions #####
##### COPYRIGHT (c) 2010 X&Y Solutions, ALL RIGHT RESERVED #####
##### www.EmpowerStats.com #####
#####
```

```
Sys.setlocale("LC_TIME", "C")
library(doBy,lib.loc=R.LibLocation)
library(plotrix,lib.loc=R.LibLocation)
library(stringi,lib.loc=R.LibLocation)
library(stringr,lib.loc=R.LibLocation)
library(survival,lib.loc=R.LibLocation)
library(rms,lib.loc=R.LibLocation)
library(nnet,lib.loc=R.LibLocation)
library(car,lib.loc=R.LibLocation)
library(mgcv,lib.loc=R.LibLocation)
pdfwd<-6; pdfht<-6
setwd("C:/Users/15949/Desktop/Obesity/PROJ3_5_tbl")
load("C:/Users/15949/Desktop/Obesity/SIIobesityAA.Rdata")
if (length(which(ls()=="EmpowerStatsR"))==0) EmpowerStatsR<-get(ls()[1])
names(EmpowerStatsR)<-toupper(names(EmpowerStatsR))
```

```
rankvar <- function(var, num) {
  qprobs <- 1/num
  if (num>2) {for (i in (2:(num-1))) {qprobs <- c(qprobs, 1/num * i) }}
  outvar <- rep(0, times=length(var))
  outvar[is.na(var)] <- NA
  cutpoints <- quantile(var,probs=qprobs, na.rm=TRUE)
  for (k in (1:length(cutpoints))) {outvar[var>=cutpoints[k]] <- k}
  tmp<-c(min(var,na.rm=TRUE),cutpoints,max(var,na.rm=TRUE))
  names(tmp)<-c("Min",names(cutpoints),"Max")
}
```

```

print(tmp)
return(outvar)
}

recodevar <- function (var,oldcode,newcode) {
  tmp.v <- var
  nc.tmp <- length(oldcode)
  for (i in (1:nc.tmp)) {tmp.v[(var==oldcode[i])]=newcode[i]}
  if (is.factor(tmp.v)) {tmp.v1<-as.numeric(as.character(tmp.v))} else {tmp.v1<-
as.numeric(tmp.v)}
  rm(tmp.v); return(tmp.v1)
}

```

```

attach(EmpowerStatsR)
sink("C:/Users/15949/Desktop/Obesity/datastep/PROJ3_datastep.lst")
print("Creating new variable: SII.Q4")
SII.Q4<- rankvar(SII,4)
EmpowerStatsR<-cbind(EmpowerStatsR,SII.Q4)
print("Creating new variable: OBESITY.NEW")
OBESITY.NEW<- recodevar(OBESITY,c(1,2),c(1,0))
EmpowerStatsR<-cbind(EmpowerStatsR,OBESITY.NEW)
rm(SII.Q4,OBESITY.NEW)
detach(EmpowerStatsR)
sink()
vname<-c("_N_", "_STAT_", "_TOTAL_", "SEQN", "GENDER", "GENDER.1", "GENDER.2")
vname<-c(vname, "AGE", "RACE", "RACE.1", "RACE.2", "RACE.3", "RACE.4")
vlabel<-c(vlabel, "AGE", "RACE", " 1", " 2", " 3", " 4")
vname<-
c(vname, "EDUCATION.LEVEL", "EDUCATION.LEVEL.1", "EDUCATION.LEVEL.2", "EDUC
ATION.LEVEL.3")
vlabel<-c(vlabel, "EDUCATION.LEVEL", " 1", " 2", " 3")
vname<-
c(vname, "MARITAL.STATUS", "MARITAL.STATUS.1", "MARITAL.STATUS.2", "MARITAL.S
TATUS.3")
vlabel<-c(vlabel, "MARITAL.STATUS", " 1", " 2", " 3")
vname<-c(vname, "WTMECPRP", "RATIO.OF.FAMILY.INCOME.TO.POVERTY")
vlabel<-c(vlabel, "WTMECPRP", "RATIO.OF.FAMILY.INCOME.TO.POVERTY")
vname<-
c(vname, "PIR", "PIR.1", "PIR.2", "PIR.3", "LYMPHOCYTE.NUMBER..1000.CELLS.UL.")
vlabel<-c(vlabel, "PIR", " 1", " 2", " 3", "LYMPHOCYTE.NUMBER..1000.CELLS.UL.")
vname<-
c(vname, "NEUTROPHILS.NUM..1000.CELL.UL.", "PLATELET.COUNT..1000.CELLS.UL.")

```

```

vlabel<-
c(vlabel,"NEUTROPHILS.NUM..1000.CELL.UL.,"PLATELET.COUNT..1000.CELLS.UL.")
vname<-c(vname,"SII","LGSII","SMOKE","SMOKE.1","SMOKE.2","SMOKE.3")
vlabel<-c(vlabel,"SII","LGSII","SMOKE"," 1"," 2"," 3")
vname<-c(vname,"SLEEP.DISORDER","SLEEP.DISORDER.1","SLEEP.DISORDER.2")
vlabel<-c(vlabel,"SLEEP.DISORDER"," 1"," 2")
vname<-
c(vname,"VIGOROUS.RECREATIONAL.ACTIVITIES","VIGOROUS.RECREATIONAL.ACTI
VITIES.1","VIGOROUS.RECREATIONAL.ACTIVITIES.2")
vlabel<-c(vlabel,"VIGOROUS.RECREATIONAL.ACTIVITIES"," 1"," 2")
vname<-
c(vname,"DAYS.VIGOROUS.RECREATIONAL.ACTIVITIES","DAYS.VIGOROUS.RECREAT
IONAL.ACTIVITIES.1","DAYS.VIGOROUS.RECREATIONAL.ACTIVITIES.2","DAYS.VIGO
ROUS.RECREATIONAL.ACTIVITIES.3","DAYS.VIGOROUS.RECREATIONAL.ACTIVITIE
S.4","DAYS.VIGOROUS.RECREATIONAL.ACTIVITIES.5","DAYS.VIGOROUS.RECREATI
ONAL.ACTIVITIES.6","DAYS.VIGOROUS.RECREATIONAL.ACTIVITIES.7")
vlabel<-c(vlabel,"DAYS.VIGOROUS.RECREATIONAL.ACTIVITIES"," 1"," 2"," 3","
4"," 5"," 6"," 7")
vname<-c(vname,"MINUTES.VIGOROUS.RECREATIONAL.ACTIVITIES")
vlabel<-c(vlabel,"MINUTES.VIGOROUS.RECREATIONAL.ACTIVITIES")
vname<-
c(vname,"MODERATE.RECREATIONAL.ACTIVITIES","MODERATE.RECREATIONAL.AC
TIVITIES.1","MODERATE.RECREATIONAL.ACTIVITIES.2")
vlabel<-c(vlabel,"MODERATE.RECREATIONAL.ACTIVITIES"," 1"," 2")
vname<-
c(vname,"DAYS.MODERATE.RECREATIONAL.ACTIVITIES","DAYS.MODERATE.RECRE
ATIONAL.ACTIVITIES.1","DAYS.MODERATE.RECREATIONAL.ACTIVITIES.2","DAYS.M
ODERATE.RECREATIONAL.ACTIVITIES.3","DAYS.MODERATE.RECREATIONAL.ACTIV
ITIES.4","DAYS.MODERATE.RECREATIONAL.ACTIVITIES.5","DAYS.MODERATE.RECR
EATIONAL.ACTIVITIES.6","DAYS.MODERATE.RECREATIONAL.ACTIVITIES.7","DAYS.
MODERATE.RECREATIONAL.ACTIVITIES.99")
vlabel<-c(vlabel,"DAYS.MODERATE.RECREATIONAL.ACTIVITIES"," 1"," 2"," 3","
4"," 5"," 6"," 7"," 99")
vname<-c(vname,"MINUTES.MODERATE.RECREATIONAL.ACTIVITIES")
vlabel<-c(vlabel,"MINUTES.MODERATE.RECREATIONAL.ACTIVITIES")
vname<-c(vname,"ACTIVITY","ACTIVITY.1","ACTIVITY.2","ACTIVITY.3")
vlabel<-c(vlabel,"ACTIVITY"," 1"," 2"," 3")
vname<-c(vname,"DRINK","DRINK.1","DRINK.2","BODY.MASS.INDEX..KG.M..2")
vlabel<-c(vlabel,"DRINK"," 1"," 2","BODY.MASS.INDEX..KG.M..2")
vname<-c(vname,"WAIST.CIRCUMFERENCE..CM.,"ENERGY..KCAL.")
vlabel<-c(vlabel,"WAIST.CIRCUMFERENCE..CM.,"ENERGY..KCAL.")
vname<-c(vname,"OBESITY","OBESITY.1","OBESITY.2","ENERGY..1000KCAL.")
vlabel<-c(vlabel,"OBESITY"," 1"," 2","ENERGY..1000KCAL.")
vname<-c(vname,"SII.Q4","SII.Q4.0","SII.Q4.1","SII.Q4.2","SII.Q4.3")

```

```

vname<-c(vname,"OBESITY.NEW","OBESITY.NEW.0","OBESITY.NEW.1")
vlabel<-c(vlabel,"OBESITY NEW"," 0"," 1")
slt.vname<-c()

library(gdata,lib.loc=R.LibLocation)
library(geepack,lib.loc=R.LibLocation)
library(mgcv,lib.loc=R.LibLocation)

ofname<-"PROJ3_5_tbl";
WD<-EmpowerStatsR; wd.subset="";
svy.DSN.YN <- FALSE;
weights<-WD$WTMECPRP;weights.var <- 'wtmecprp';
WD<-cbind(WD,weights); WD<-WD[!is.na(weights),];
attach(WD)
subjvname<-NA;
yv<-cbind(BODY.MASS.INDEX..KG.M..2.);
yvname<-c('BODY.MASS.INDEX..KG.M..2.');
```

yvar<-c('BODY\_MASS\_INDEX\_KG\_M\_2\_');
ydist<-c('gaussian');
ylink<-c('identity');
ylv<-c(0);
xv<-cbind(SII.Q4);
xvname<-c('SII.Q4');
xvar<-c('SII\_Q4');
xlv<-c(4);
sxf<-c(NA,0)[-1];
sv<-
cbind(GENDER,AGE,RACE,EDUCATION.LEVEL,MARITAL.STATUS,PIR,SMOKE,SLEEP.D
ISORDER,ACTIVITY,DRINK,ENERGY..1000KCAL.);
svname<-
c('GENDER','AGE','RACE','EDUCATION.LEVEL','MARITAL.STATUS','PIR','SMOKE','SLEEP
.DISORDER','ACTIVITY','DRINK','ENERGY..1000KCAL.');

svar<-
c('GENDER','AGE','RACE','EDUCATION\_LEVEL','MARITAL\_STATUS','PIR','SMOKE','SLEE
P\_DISORDER','ACTIVITY','DRINK','ENERGY\_\_1000KCAL\_');

sdf<-c(NA,0,0,0,0,0,0,0,0,0,0)[-1];
slv<-c(2,0,4,3,3,3,3,2,3,2,0);
av<-cbind(GENDER,AGE,RACE);
avname<-c('GENDER','AGE','RACE');

if (!is.na(avname[1])) avlbl<-vlabel[match(avname, vname)];
nadj<-length(avname);alv<-c(2,0,4);
saf<-c(NA,0,0,0)[-1];
timev<-NA; timevname<-NA;
bv<-NA; bvar<-NA;

```

colv<-NA; colvname<-NA;
v.start<-NA; vname.start<-NA;
v.stop<-NA; vname.stop<-NA;
par1<-1;dec<-2;parm<-c(1,NA, 1,1, 0);
if (!exists("pdfwd")) pdfwd<-6;
if (!exists("pdfht")) pdfht<-6;
##R package## gdata geepack mgcv ##R package##;
pvformat<-function(p,dec) {
  pp <- sprintf(paste("%.",dec,"f",sep=""),as.numeric(p))
  if (is.matrix(p)) {pp<-matrix(pp, nrow=nrow(p)); colnames(pp)<-colnames(p);rownames(pp)<-
rownames(p);}
  lw <- paste("<",substr("0.0000000000",1,dec+1),"1",sep="");
  pp[as.numeric(p)<(1/10^dec)]<-lw
  return(pp)
}
numfmt<-function(p,dec) {
  if (is.list(p)) p<-as.matrix(p)
  pp <- sprintf(paste("%.",dec,"f",sep=""),as.numeric(p))
  if (is.matrix(p)) {pp<-matrix(pp, nrow=nrow(p));colnames(pp)<-colnames(p);rownames(pp)<-
rownames(p);}
  pp[as.numeric(p)>10000000]<- "inf."
  pp[is.na(p) | gsub(" ",",",p)==""]<- ""
  pp[p=="-Inf"]<-"-Inf"
  pp[p=="Inf"]<- "Inf"
  return(pp)
}

varstats<-function(var,vlvl,dec) {
  if (length(vlvl)==1 & vlvl[1]==0) {

return(paste(numfmt(mean(var,na.rm=TRUE),dec),numfmt(sd(var,na.rm=TRUE),dec),sep="+"))
  } else {
    a<-table(var)
    b<-matrix(paste(a, " (", numfmt(a/sum(a)*100,dec), "%)",sep=""),ncol=1)
    return(c(" ",b[match(vlvl,names(a))]))
  }
}

mat2htmltable<-function(mat) {
  t1<- apply(mat,1,function(z) paste(z,collapse="</td><td>"))
  t2<- paste("<tr><td>",t1,"</td></tr>")
  return(paste(t2,collapse=" "))
}

setgam<-function(fml,yi) {
  if (ydist[yi]=="") ydist[yi]<- "gaussian"

```

```

    if (ydist[yi]=="exact") ydist[yi]<-"binomial"
    if (ydist[yi]=="breslow") ydist[yi]<-"binomial"
    if (ydist[yi]=="gaussian") mdl<-try(gam(formula(fml),weights=wdtmp$weights,data=wdtmp,
family=gaussian(link="identity")))
    if (ydist[yi]=="binomial") mdl<-try(gam(formula(fml),weights=wdtmp$weights,data=wdtmp,
family=binomial(link="logit")))
    if (ydist[yi]=="poisson") mdl<-try(gam(formula(fml),weights=wdtmp$weights,data=wdtmp,
family=poisson(link="log")))
    if (ydist[yi]=="gamma") mdl<-try(gam(formula(fml),weights=wdtmp$weights,data=wdtmp,
family=Gamma(link="inverse")))
    if (ydist[yi]=="negbin") mdl<-try(gam(formula(fml),weights=wdtmp$weights,data=wdtmp,
family=negbin(c(1,10), link="log")))
    return(mdl)
}
setgee<-function(fml,yi) {
  if (ydist[yi]=="") ydist[yi]<-"gaussian"
  if (ydist[yi]=="exact") ydist[yi]<-"binomial"
  if (ydist[yi]=="breslow") ydist[yi]<-"binomial"
  if
      (ydist[yi]=="gaussian")
      mdl<-
try(geeglm(formula(fml),id=wdtmp[,subjvname],corstr=gee.TYPE,family="gaussian",weights=w
dtmp$weights,data=wdtmp))
  if
      (ydist[yi]=="binomial")
      mdl<-
try(geeglm(formula(fml),id=wdtmp[,subjvname],corstr=gee.TYPE,family="binomial",weights=w
dtmp$weights,data=wdtmp))
  if
      (ydist[yi]=="poisson")
      mdl<-
try(geeglm(formula(fml),id=wdtmp[,subjvname],corstr=gee.TYPE,family="poisson",weights=wd
tmp$weights,data=wdtmp))
  if
      (ydist[yi]=="gamma")
      mdl<-
try(geeglm(formula(fml),id=wdtmp[,subjvname],corstr=gee.TYPE,family="Gamma",weights=wd
tmp$weights,data=wdtmp))
  if
      (ydist[yi]=="negbin")
      mdl<-
try(geeglm.nb(formula(fml),id=wdtmp[,subjvname],corstr=gee.TYPE,weights=wdtmp$weights,da
ta=wdtmp))
  return(md)
}
setglm<-function(fml,yi) {
  if (ydist[yi]=="") ydist[yi]<-"gaussian"
  if (ydist[yi]=="exact") ydist[yi]<-"binomial"
  if (ydist[yi]=="breslow") ydist[yi]<-"binomial"
  if
      (ydist[yi]=="gaussian")
      mdl<-
try(glm(formula(fml),family="gaussian",weights=wdtmp$weights,data=wdtmp))
  if
      (ydist[yi]=="binomial")
      mdl<-
try(glm(formula(fml),family="binomial",weights=wdtmp$weights,data=wdtmp))
  if
      (ydist[yi]=="poisson")
      mdl<-

```



```

try(glm(formula(fml),family="poisson",weights=wdtmp$weights,data=wdtmp))
  if (ydist[yi]=="gamma") md<-
try(glm(formula(fml),family="Gamma",weights=wdtmp$weights,data=wdtmp))
  if (ydist[yi]=="negbin") md<-try(glm.nb(formula(fml),weights=wdtmp$weights,data=wdtmp))
  return(md)
}
mdl2oo<-function(mdl, xxname, opt) {
  if (is.na(mdl[[1]][1])) return(list(rep("",times=length(xxname)), ""))
  if (substr(mdl[[1]][1],1,5)=="Error") return(list(rep("",times=length(xxname)), ""))
  gs<-summary(mdl); print(mdl$formula); print(gs)
  if (opt=="gam") {gsparm <- gs$p.table;tmpn<-gs$n;
  } else {gsparm <- gs$coefficients;tmpn <- sum(gs$df[c(1,2)]);}
  gsp<-gsparm[match(xxname,rownames(gsparm)),]
  if (length(xxname)==1) {beta<-gsp[1]; se<-gsp[2]; pv<-gsp[4];
  } else {beta<-gsp[,1]; se<-gsp[,2]; pv<-gsp[,4]; }
  ci1<- beta-1.96*se; ci2<- beta+1.96*se
  pvx<-substr(rep("****",length(pv)),1,(pv<=0.05)+(pv<=0.01)+(pv<=0.001))
  if (colprn==3) {pvv<-pvx;} else {pvv<-pvformat(pv,dec+2);}
  if ((colprn!=2) & (gs$family[[2]]=="log" | gs$family[[2]]=="logit")) {
    o1<-paste(numfmt(exp(beta),dec)," (" ,numfmt(exp(ci1),dec),"
",numfmt(exp(ci2),dec),")",sep="")
  } else {
    if (colprn<3) {o1<-paste(numfmt(beta,dec), " (" ,numfmt(ci1,dec),"
",numfmt(ci2,dec),")",sep="")
    } else {o1<-paste(numfmt(beta,dec), "+",numfmt(se,dec),sep="");}
  }
  o1<-paste(o1,ppv); o1[is.na(beta)]<-NA
  if (length(xxname)>1) {
    if (gs$family[[2]]=="log" | gs$family[[2]]=="logit") {
      o1[is.na(o1) & substr(xxname,1,7)=="factor("<- "1.0"
    } else {o1[is.na(o1) & substr(xxname,1,7)=="factor("<- "0";}
    o1[is.na(o1)]<-"";
  }
  return(list(o1,tmpn))
}
recodevar <- function (var,oldcode,newcode) {
  tmp.v <- var
  nc.tmp <- length(oldcode)
  for (i in (1:nc.tmp)) {tmp.v[(var==oldcode[i])]=newcode[i]}
  if (is.factor(tmp.v)) {tmp.v1<-as.numeric(as.character(tmp.v))} else {tmp.v1<-
as.numeric(tmp.v)}
  rm(tmp.v); return(tmp.v1)
}
rankvar <- function(var, num) {

```

```

qprobs <- 1/num
if (num>2) {for (i in (2:(num-1))) {qprobs <- c(qprobs, 1/num * i) } }
outvar <- rep(0, times=length(var))
outvar[is.na(var)] <- NA
cutpoints <- quantile(var,probs=qprobs, na.rm=TRUE)
for (k in (1:length(cutpoints))) { outvar[var>=cutpoints[k]] <- k; }
return(outvar)
}
removeNA<-function(i,j,m,wdf) {
  vvv<-c(yvname[i],adjvv[[m]],subjvname,colvname,bvar,vname.start,vname.stop,timevname);
  if (j<=nx) {vvv<-c(vvv,xvname[j]);} else {vvv<-c(vvv,xvname);}
  vvv<-vvv[!is.na(vvv)]; vvv<-vvv[vvv>" "]
  tmp<-is.na(wdf[,vvv]);
  return(wdf[apply(tmp,1,sum)==0,])
}
vlabelN<-(substr(vlabel,1,1)==" ");
vlabelZ<-vlabel[vlabelN];vlabelV<-vlabel[!vlabelN]
vnameV<-vname[!vlabelN];vnameZ<-vname[vlabelN]
w<-c("<html><head>","<meta http-equiv=\"Content-Type\" content=\"text/html\"
charset=\"gb2312\" /></head><body>")
if (!is.na(avname[1])) {
  if (sum((saf=="s" | saf=="S") & alv>0)>0) w<-c(w,"<br>Spline smoothing only applies for
continuous variables")
  if (!is.na(subjvname) & (sum((saf=="s" | saf=="S") & alv==0)>0)) w<-c(w,"<br>Generalized
estimate equation could not be used with spline smoothing terms")
}
if (!is.na(svname[1])) {
  if (sum((sdf=="s" | sdf=="S") & slv>0)>0) w<-c(w,"<br>Spline smoothing only applies for
continuous variables")
  if (!is.na(subjvname) & (sum((sdf=="s" | sdf=="S") & slv==0)>0)) w<-c(w,"<br>Generalized
estimate equation could not be used with spline smoothing terms")
}
allvname<-
c(yvname,xvname,colvname,bvar,avname,svname,subjvname,vname.start,vname.stop,timevname,
"weights");
allvname<-allvname[!is.na(allvname)]
WD<-WD[,allvname];
if (!is.na(subjvname)) WD<-WD[order(WD[,subjvname]),]
if (!is.na(sxf[1])) {
  if (sum(sxf>1 & xlv>0)>0) w<-c(w,"Categorizing only applies to continuous variables");
  if (sum(sxf>1 & xlv==0)>0) {
    t.xname<-NA;t.xlv<-NA; nx<-length(xvname)
    for (i in 1:nx) {
      if (sxf[i]>1 & xlv[i]==0) {

```

```

tmp.Xi<- rankvar(WD[,xvname[i]],sxf[i])
tmp.newcode <- tapply(WD[,xvname[i]],tmp.Xi,function(z) median(z,na.rm=TRUE))
tmp.low <- tapply(WD[,xvname[i]],tmp.Xi,function(z) min(z,na.rm=TRUE))
tmp.upp <- tapply(WD[,xvname[i]],tmp.Xi,function(z) max(z,na.rm=TRUE))
tmp.Xi2<- recodevar(tmp.Xi,(1:sxf[i])-1,tmp.newcode)
tmp.Xi<-cbind(tmp.Xi,tmp.Xi2)
tmp.NM<-paste(xvname[i],c("grp","grp.cont"),sep=".")
colnames(tmp.Xi)<-tmp.NM
WD<-cbind(WD,tmp.Xi)
t.xname<-c(t.xname,tmp.NM)
t.xlv<-c(t.xlv,sxf[i],0)
vnameV<-c(vnameV,tmp.NM)
vlabelV<-c(vlabelV,paste(vlabelV[vnameV==xvname[i]],c("group","group trend")))
vnameZ<-c(vnameZ,paste(tmp.NM[1],(1:sxf[i])-1,sep=". "))
vlabelZ<-c(vlabelZ,paste(tmp.low,"-",tmp.upp))
} else {
  t.xname<-c(t.xname,xvname[i]); t.xlv<-c(t.xlv,xlv[i])
}
}
}
xvname<-t.xname[-1]; xlv<-t.xlv[-1];
}
}
rm(xv,yv,bv,av,sv,colv,v.start,v.stop)
if (!is.na(subjvname)) {
  if (!is.na(avname[1])) saf<-rep(0,length(saf));
  if (!is.na(svname[1])) sdf<-rep(0,length(sdf));
  WD<-WD[order(WD[,subjvname]),,];
}
fmlm<-" "; fmlb<-"Non-adjusted"; tmp<-""; adjv<-list(NA); adjvb<-"None";
fmlp<-ifelse(!is.na(subjvname), "gee", "glm");
na=0; avb=""; smoothav<-0; nadjm<-0
if (!is.na(avname[1])) {
  na<-length(avname)
  avb<-vlabelV[match(avname,vnameV)];
  avname_ <- avname
  smoothavi<-((saf=="s" | saf=="S") & alv==0)
  smoothav<-sum(smoothavi)
  smoothavname<-avname[smoothavi]
  avname_[smoothavi]<-paste("s(",avname[smoothavi],")",sep="")
  avb1<-avb
  avb1[smoothavi]<-paste(avb[smoothavi],"(Smooth)",sep="")
  avname_[alv>0]<-paste("factor(",avname[alv>0],")",sep="")
  fmlm<-c(fmlm,paste("+",paste(avname_,collapse="+")))
  fmlb<-c(fmlb,"Adjust")
}

```



```

}
xxname_<-xxname_-[-1]; xxlbl_<-xxlbl_-[-1]; xxlvl_<-xxlvl_-[-1];
if (nx==1) par1<-1;
if (is.na(par1)) par1<-1;
if (par1>1) {
  tmp1<-xxname_ [[1]]; tmp2<-xxlbl_ [[1]]
  for (j in 2:nx) {tmp1<-c(tmp1,xxname_ [[j]]); tmp2<-c(tmp2,xxlbl_ [[j]]);}
  xxname_ [[nx+1]]<-tmp1; xxlbl_ [[nx+1]]<-tmp2;
  xvname_ <-c(xvname_ ,paste(xvname_ ,collapse="+"))
}
contx<-(sum(xlv>0)==0)
if (par1==3 & !is.na(bvar)) {w<-c(w,"<br>Column stratified variable was ignored"); bvar<-NA;
bvname<-NA;}

if (is.na(bvar) & !is.na(colvname) & nmdl==1 & par1!=3) {if ((ny==1) | (nx==1 & contx)) {bvar<-
colvname; colvname<-NA;}}
if (is.na(colvname)) {
  nclv<-1; clvb<- "Total"; clvb_ <- "Total"
} else {
  clv<-levels(factor(WD[,colvname])); nclv<-length(clv)+1
  clvb_ <-vlabelZ[match(paste(colvname, ".", clv, sep=""),vnameZ)]; clvb_[is.na(clvb_)]<-
clv[is.na(clvb_)];
  clvb<-c(paste(vlabelV[vnameV==colvname],clvb_ ,sep="="),"Total");
  clvb_ <-c(clvb_ ,"Total")
  WD<-WD[!is.na(WD[,colvname]),]
}
if (is.na(bvar)) {
  blvb<- "Total"; blvb_ <- "Total"
} else {
  blv<-levels(factor(WD[,bvar])); nblv<-length(blv)+1
  blvb_ <-vlabelZ[match(paste(bvar, ".", blv, sep=""),vnameZ)]; blvb_[is.na(blvb_)]<-
blv[is.na(blvb_)];
  blvb<-c(paste(vlabelV[vnameV==bvar],blvb_ ,sep="="),"Total");
  blvb_ <-c(blvb_ ,"Total")
  WD<-WD[!is.na(WD[,bvar]),]
}
aa<-c(1,2,3,4)
for (i in 1:4) {
  for (j in c(1:4)[-i]) {
    for (k in c(1:4)[-c(i,j)]) aa<-rbind(aa,c(i,j,k,c(1:4)[-c(i,j,k)]))
  }
}
if (is.na(parm[4])) parm[4]<-1
rord<-aa[parm[4],]

```

```

if (!is.na(bvar)) {prn<-"S";
} else {
  if (parm[4]>1) {
    rordc<-ifelse(rord[4]==1,3,4)
    prn<-c("G","Y","M","X")[rord[rordc]]
    if (prn=="X") {
      if (!contx & nx>1) prn<-ifelse(nmdl>1, "M", ifelse(ny>nx & contx, "X", "Y"))
      if (!contx & nx==1) prn<-"CX"
      if (par1==2) {tmp<-ifelse(rordc==4,ifelse(rord[3]==1,2,3),2); prn<-
c("G","Y","M","X")[rord[tmp]];}
    }
  } else {
    prn<-ifelse(nmdl>1, "M", ifelse(ny>nx & contx, "X", "Y"))
    if (par1==2) prn<-ifelse(nmdl>1, "M", "Y")
  }
  if (par1==3) prn<-"UM"
}
colprn<-parm[3];
sink(paste(ofname, ".lst", sep=""))
if (par1==2) {xbgn<-nx+1; xend<-nx+1;} else {xbgn<-1; xend<-nx;}
if (prn=="Y") {
  tt<-c(0,0,0,0,"Exposure",yb); nn<-c(0,0,0,0,yb);
  for (k in (1:nclv)) {
    wdtmp0<-WD;
    if (!is.na(colvname)) {
      if (k<nclv) wdtmp0<-WD[WD[,colvname]==clv[k],];
      print(paste("Stratified by",colvname, ":", clvb[k]))
    }
    for (m in 1:nmdl) {
      for (j in (xbgn:xend)) {
        colj<-cbind(k,0,m,j,xxlbl_[[j]])
        nnj <-c(k,0,m,j)
        for (i in (1:ny)) {
          fml<-paste(yvname[i],"~",xvname_[j],fmlm[m]);
          wdtmp<-removeNA(i,j,m,wdtmp0)
          if (!is.na(colvname)) {if (k==nclv) fml<-paste(fml,"+factor(",colvname,")",sep="");}
          if (fmlp[m]=="gam") tmp.mdl<-setgam(fml,i)
          if (fmlp[m]=="gee") tmp.mdl<-setgee(fml,i)
          if (fmlp[m]=="glm") tmp.mdl<-setglm(fml,i)
          tmppooi<-mdl2oo(tmp.mdl,xxname_[[j]],fmlp[m])
          colj<-cbind(colj,tmppooi[[1]]); nnj<-c(nnj,tmppooi[[2]])
        }
        tt<-rbind(tt,colj); nn<-rbind(nn,nnj)
      }
    }
  }
}

```

```

    }
  }
}
if (prn=="S") {
  tt<-c(0,0,0,0,"Exposure",blvb); nn<-c(0,0,0,0,blvb);
  for (k in (1:nclv)) {
    wdtmp0<-WD;
    if (!is.na(colvname)) {
      if (k<nclv) wdtmp0<-WD[WD[,colvname]==clv[k],];
      print(paste("Stratified by",colvname, ":", clvb[k]))
    }
    for (i in (1:ny)) {
      for (m in 1:nmdl) {
        for (j in (xbgn:xend)) {
          colj<-cbind(k,i,m,j,xxlbl_[[j]]);
          nnj <- c(k,i,m,j)
          for (b in (1:nblv)) {
            print(paste("Stratified by",bvar, ":", blvb[b]))
            fml<-paste(yvname[i],"~",xvname_[j],fmlm[m]);
            if (b<nblv) {
              wdtmp1<-wdtmp0[wdtmp0[,bvar]==blv[b],];
            } else {
              wdtmp1<-wdtmp0; fml<-paste(fml,"+factor(",bvar,")",sep="");
            }
            wdtmp<-removeNA(i,j,m,wdtmp1)
            if (!is.na(colvname)) {if (k==nclv) fml<-paste(fml,"+factor(",colvname,")",sep="");}
            if (fmlp[m]=="gam") tmp.mdl<-setgam(fml,i)
            if (fmlp[m]=="gee") tmp.mdl<-setgee(fml,i)
            if (fmlp[m]=="glm") tmp.mdl<-setglm(fml,i)
            tmp.poi<-mdl2oo(tmp.mdl,xxname_[[j]],fmlp[m])
            colj<-cbind(colj,tmp.poi[[1]]); nnj<-c(nnj,tmp.poi[[2]])
          }
          tt<-rbind(tt,colj); nn<-rbind(nn,nnj)
        }
      }
    }
  }
}
if (prn=="M") {
  tt<-c(0,0,0,0,"Exposure",fmlb); nn<-c(0,0,0,0,fmlb)
  for (k in (1:nclv)) {
    wdtmp0<-WD;
    if (!is.na(colvname)) {
      if (k<nclv) wdtmp0<-WD[WD[,colvname]==clv[k],];

```

```

    print(paste("Stratified by",colvname, ":", clvb[k]))
  }
  for (i in 1:ny) {
    for (j in xbg:nxend) {
      colj<-cbind(k,i,0,j,xxlbl_[[j]]); nnj<-c(k,i,0,j)
      for (m in 1:nmdl) {
        fml<-paste(yvname[i],"~",xvname_[j],fmlm[m]);
        wdtmp<-removeNA(i,j,m,wdtmp0)
        if (!is.na(colvname)) {if (k==nclv) fml<-paste(fml,"+factor(",colvname,")",sep="");}
        if (fmlp[m]=="gam") tmp.mdl<-setgam(fml,i)
        if (fmlp[m]=="gee") tmp.mdl<-setgee(fml,i)
        if (fmlp[m]=="glm") tmp.mdl<-setglm(fml,i)
        tmppoi<-mdl2oo(tmp.mdl,xxname_[[j]],fmlp[m])
        colj<-cbind(colj,tmppoi[[1]]); nnj<-c(nnj,tmppoi[[2]])
      }
      tt<-rbind(tt,colj); nn<-rbind(nn,nnj)
    }
  }
}
}
}
if (prn=="X") {
  tt<-c(0,0,0,0,"Outcome",xb); nn<-c(0,0,0,0,xb);
  for (k in (1:nclv)) {
    wdtmp0<-WD;
    if (!is.na(colvname)) {
      if (k<nclv) wdtmp0<-WD[WD[,colvname]==clv[k],];
      print(paste("Stratified by",colvname, ":", clvb[k]))
    }
    for (m in 1:nmdl) {
      for (i in (1:ny)) {
        colj<-cbind(k,i,m,0,yb[i])
        nnj <-c(k,i,m,0)
        for (j in (1:nx)) {
          fml<-paste(yvname[i],"~",xvname_[j],fmlm[m]);
          wdtmp<-removeNA(i,j,m,wdtmp0)
          if (!is.na(colvname)) {if (k==nclv) fml<-paste(fml,"+factor(",colvname,")",sep="");}
          if (fmlp[m]=="gam") tmp.mdl<-setgam(fml,i)
          if (fmlp[m]=="gee") tmp.mdl<-setgee(fml,i)
          if (fmlp[m]=="glm") tmp.mdl<-setglm(fml,i)
          tmppoi<-mdl2oo(tmp.mdl,xxname_[[j]],fmlp[m])
          colj<-cbind(colj,tmppoi[[1]]); nnj<-c(nnj,tmppoi[[2]])
        }
        tt<-rbind(tt,colj); nn<-rbind(nn,nnj)
      }
    }
  }
}

```



```

    }
  }
}
if (prn=="CX") {
  tt<-c(0,0,0,0,"Outcome",xxlbl_[[1]][-1]); nn<-c(0,0,0,0,xb[1]);
  nxl<-length(xxlbl_[[1]])-1
  for (k in (1:nclv)) {
    wdtmp0<-WD;
    if (!is.na(colvname)) {
      if (k<nclv) wdtmp0<-WD[WD[,colvname]==clv[k],];
      print(paste("Stratified by",colvname, ":", clvb[k]))
    }
    for (m in 1:nmdl) {
      for (i in (1:ny)) {
        colj<-c(k,i,m,0,yb[i])
        nnj <-c(k,i,m,0)
        fml<-paste(yvname[i],"~",xvname_[1],fmlm[m]);
        wdtmp<-removeNA(i,1,m,wdtmp0)
        if (!is.na(colvname)) {if (k==nclv) fml<-paste(fml,"+factor(",colvname,")",sep="");}
        if (fmlp[m]=="gam") tmp.mdl<-setgam(fml,i)
        if (fmlp[m]=="gee") tmp.mdl<-setgee(fml,i)
        if (fmlp[m]=="glm") tmp.mdl<-setglm(fml,i)
        tmppooi<-mdl2oo(tmp.mdl,xxname_[[1]],fmlp[m])
        colj<-c(colj,tmppooi[[1]][-1]); nnj<-c(nnj,tmppooi[[2]])
        tt<-rbind(tt,colj); nn<-rbind(nn,nnj)
      }
    }
  }
}
if (prn=="UM") {
  tt<-c(0,0,0,0,"Exposure","Univariable","Multivariable");
  c(0,0,0,0,"Univariable","Multivariable")
  for (k in (1:nclv)) {
    wdtmp0<-WD;
    if (!is.na(colvname)) {
      if (k<nclv) wdtmp0<-WD[WD[,colvname]==clv[k],];
      print(paste("Stratified by",colvname, ":", clvb[k]))
    }
    for (i in 1:ny) {
      for (m in 1:nmdl) {
        colm<-rep(NA,6); nnm<-rep(NA,5)
        for (j in 1:(nx+1)) {
          colj<-cbind(k,i,m,j,xxlbl_[[j]]); nnj<-c(k,i,m,j)
          fml<-paste(yvname[i],"~",xvname_[j],fmlm[m]);

```

```

      wdtmp<-removeNA(i,j,m,wdtmp0)
      if (!is.na(colvname)) {if (k==nclv) fml<-paste(fml,"+factor(",colvname,")",sep="");}
      if (fmlp[m]=="gam") tmp.mdl<-setgam(fml,i)
      if (fmlp[m]=="gee") tmp.mdl<-setgee(fml,i)
      if (fmlp[m]=="glm") tmp.mdl<-setglm(fml,i)
      tmppoi<-mdl2oo(tmp.mdl,xxname_[[j]],fmlp[m])
      colj<-cbind(colj,tmppoi[[1]]); nnj<-c(nnj,tmppoi[[2]])
      if (j<=nx) {colm<-rbind(colm,colj); nnm<-rbind(nnm,nnj);
      } else {colm<-cbind(colm[-1,],tmppoi[[1]]); nnm<-cbind(nnm[-1,],tmppoi[[2]]);}
    }
    tt<-rbind(tt,colm); nn<-rbind(nn,nnm)
  }
}
}
}
sink()
if (!contx & prn!="CX") rord<-c(rord[rord!=4],4)
if (prn=="X" | prn=="CX") rord<-rord[rord!=4]
if (prn=="Y") rord<-rord[rord!=2]
if (prn=="M") rord<-rord[rord!=3]
if (nx==1 & contx) rord<-rord[rord!=4]
if (nmdl==1) rord<-rord[rord!=3]
if (ny==1) rord<-rord[rord!=2]
if (is.na(colvname)) rord<-rord[rord!=1]
if (length(rord)==0) rord<-1
nrr<-length(rord)
for (i in nrr:1) {nn<-nn[order(as.numeric(nn[,rord[i]])),];tt<-tt[order(as.numeric(tt[,rord[i]])),];}
if (nn[2,4]>0) {nn[,4]<-c("Exposure",xb[as.numeric(nn[-1,4])]); } else {nn<-nn[,-4];}
if (nn[2,3]>0) {nn[,3]<-c("Model",fmlb[as.numeric(nn[-1,3])]); } else {nn<-nn[,-3];}
if (nn[2,2]>0) {nn[,2]<-c("Outcome",yb[as.numeric(nn[-1,2])]); } else {nn<-nn[,-2];}
if (!is.na(colvname)) {nn[,1]<-c(vlabel[vname==colvname],clvb_[as.numeric(nn[-1,1])]); } else
{nn<-nn[,-1];}
tb<-matrix(as.numeric(tt[,c(1:4)]),ncol=4);
if (!is.na(colvname)) {tt[,1]<-c(vlabelV[vnameV==colvname],clvb[tb[-1,1]]);}
if (ny>1) {tt[,2]<-c("Outcome",yb[tb[-1,2]]);}
if (nmdl>1) {tt[,3]<-c("Model",fmlb[tb[-1,3]]);}
nrr1<-nrr-1; oo<-tt[1,]; nc<-ncol(tt)-5; nr<-nrow(tt)
for (i in 2:nr) {
  if (nrr>1) {
    for (j in 1:nrr1) {
      if (tb[i,rord[j]]!=tb[i-1,rord[j]]) oo<-rbind(oo,c(rep(tt[i,rord[j]],5),rep(" ",nc)))
    }
  }
}
oo<-rbind(oo,tt[i,])

```

```

}
if (rord[nrr]!=4 & tt[1,rord[nrr]]!="0") {oo<-cbind(oo[,rord[nrr]],oo[,-(1:5)]);} else {oo<-oo[,-(1:4)]}
w<-c(w,paste("<h2>", title, "</h2>"))
w<-c(w,"<br><table border=3>", mat2htmltable(oo), "</table>")
prnpt<-c("β (95%CI) Pvalue / OR (95%CI) Pvalue", "β (95%CI) Pvalue", "β+se / OR (95%CI) *P<0.05 **P<0.01 ***P<0.001")

for (m in 1:nmdl) w<-c(w,paste("<br>",fmlb[m],"model adjust for:", adjvb[m]))
if (smoothav>0 | smoothsv>0) w<-c(w,". Generalized additive models were applied")
if (!is.na(subjvname)) w<-c(w, paste("<br>Generalized estimate equation were used, subject ID=", subjvname, "(", gee.TYPE, ")",sep=""))

```

```

R.Version4RUN<-343;
R.LibLocation <- "C:/Users/15949/AppData/Roaming/EmpowerRCH/R343/library"
##### Regarding ALL Following R Functions #####
##### COPYRIGHT (c) 2010 X&Y Solutions, ALL RIGHT RESERVED #####
##### www.EmpowerStats.com #####
#####

Sys.setlocale("LC_TIME", "C")
library(doBy,lib.loc=R.LibLocation)
library(plotrix,lib.loc=R.LibLocation)
library(stringi,lib.loc=R.LibLocation)
library(stringr,lib.loc=R.LibLocation)
library(survival,lib.loc=R.LibLocation)
library(rms,lib.loc=R.LibLocation)
library(nnet,lib.loc=R.LibLocation)
library(car,lib.loc=R.LibLocation)
library(mgcv,lib.loc=R.LibLocation)
pdfwd<-6; pdfht<-6
setwd("C:/Users/15949/Desktop/Obesity/PROJ3_6_tbl")
load("C:/Users/15949/Desktop/Obesity/SIIobesityAA.Rdata")
if (length(which(ls()=="EmpowerStatsR"))==0) EmpowerStatsR<-get(ls()[1])
names(EmpowerStatsR)<-toupper(names(EmpowerStatsR))

```

```

rankvar <- function(var, num) {
  qprobs <- 1/num
  if (num>2) {for (i in (2:(num-1))) {qprobs <- c(qprobs, 1/num * i) }}
  outvar <- rep(0, times=length(var))
  outvar[is.na(var)] <- NA
  cutpoints <- quantile(var,probs=qprobs, na.rm=TRUE)
}

```

```

for (k in (1:length(cutpoints))) {outvar[var>=cutpoints[k]] <- k}
tmp<-c(min(var,na.rm=TRUE),cutpoints,max(var,na.rm=TRUE))
names(tmp)<-c("Min",names(cutpoints),"Max")
print(tmp)
return(outvar)
}

```

```

recodevar <- function (var,oldcode,newcode) {
  tmp.v <- var
  nc.tmp <- length(oldcode)
  for (i in (1:nc.tmp)) {tmp.v[(var==oldcode[i])]=newcode[i]}
  if (is.factor(tmp.v)) {tmp.v1<-as.numeric(as.character(tmp.v))} else {tmp.v1<-
as.numeric(tmp.v)}
  rm(tmp.v); return(tmp.v1)
}

```

```

attach(EmpowerStatsR)
sink("C:/Users/15949/Desktop/Obesity/datastep/PROJ3_datastep.lst")
print("Creating new variable: SII.Q4")
SII.Q4<- rankvar(SII,4)
EmpowerStatsR<-cbind(EmpowerStatsR,SII.Q4)
print("Creating new variable: OBESITY.NEW")
OBESITY.NEW<- recodevar(OBESITY,c(1,2),c(1,0))
EmpowerStatsR<-cbind(EmpowerStatsR,OBESITY.NEW)
rm(SII.Q4,OBESITY.NEW)
detach(EmpowerStatsR)
sink()
vname<-c("_N_", "_STAT_", "_TOTAL_", "SEQN", "GENDER", "GENDER.1", "GENDER.2")
vname<-c(vname, "AGE", "RACE", "RACE.1", "RACE.2", "RACE.3", "RACE.4")
vlabel<-c(vlabel, "AGE", "RACE", " 1", " 2", " 3", " 4")
vname<-
c(vname, "EDUCATION.LEVEL", "EDUCATION.LEVEL.1", "EDUCATION.LEVEL.2", "EDUC
ATION.LEVEL.3")
vlabel<-c(vlabel, "EDUCATION.LEVEL", " 1", " 2", " 3")
vname<-
c(vname, "MARITAL.STATUS", "MARITAL.STATUS.1", "MARITAL.STATUS.2", "MARITAL.S
TATUS.3")
vlabel<-c(vlabel, "MARITAL.STATUS", " 1", " 2", " 3")
vname<-c(vname, "WTMECPRP", "RATIO.OF.FAMILY.INCOME.TO.POVERTY")
vlabel<-c(vlabel, "WTMECPRP", "RATIO.OF.FAMILY.INCOME.TO.POVERTY")
vname<-
c(vname, "PIR", "PIR.1", "PIR.2", "PIR.3", "LYMPHOCYTE.NUMBER..1000.CELLS.UL.")

```

```

vlabel<-c(vlabel,"PIR"," 1"," 2"," 3","LYMPHOCYTE.NUMBER..1000.CELLS.UL.")
vname<-
c(vname,"NEUTROPHILS.NUM..1000.CELL.UL.", "PLATELET.COUNT..1000.CELLS.UL.")
vlabel<-
c(vlabel,"NEUTROPHILS.NUM..1000.CELL.UL.", "PLATELET.COUNT..1000.CELLS.UL.")
vname<-c(vname,"SII","LGSII","SMOKE","SMOKE.1","SMOKE.2","SMOKE.3")
vlabel<-c(vlabel,"SII","LGSII","SMOKE"," 1"," 2"," 3")
vname<-c(vname,"SLEEP.DISORDER","SLEEP.DISORDER.1","SLEEP.DISORDER.2")
vlabel<-c(vlabel,"SLEEP.DISORDER"," 1"," 2")
vname<-
c(vname,"VIGOROUS.RECREATIONAL.ACTIVITIES","VIGOROUS.RECREATIONAL.ACTI
VITIES.1","VIGOROUS.RECREATIONAL.ACTIVITIES.2")
vlabel<-c(vlabel,"VIGOROUS.RECREATIONAL.ACTIVITIES"," 1"," 2")
vname<-
c(vname,"DAYS.VIGOROUS.RECREATIONAL.ACTIVITIES","DAYS.VIGOROUS.RECREAT
IONAL.ACTIVITIES.1","DAYS.VIGOROUS.RECREATIONAL.ACTIVITIES.2","DAYS.VIGO
ROUS.RECREATIONAL.ACTIVITIES.3","DAYS.VIGOROUS.RECREATIONAL.ACTIVITIE
S.4","DAYS.VIGOROUS.RECREATIONAL.ACTIVITIES.5","DAYS.VIGOROUS.RECREATI
ONAL.ACTIVITIES.6","DAYS.VIGOROUS.RECREATIONAL.ACTIVITIES.7")
vlabel<-c(vlabel,"DAYS.VIGOROUS.RECREATIONAL.ACTIVITIES"," 1"," 2"," 3","
4"," 5"," 6"," 7")
vname<-c(vname,"MINUTES.VIGOROUS.RECREATIONAL.ACTIVITIES")
vlabel<-c(vlabel,"MINUTES.VIGOROUS.RECREATIONAL.ACTIVITIES")
vname<-
c(vname,"MODERATE.RECREATIONAL.ACTIVITIES","MODERATE.RECREATIONAL.AC
TIVITIES.1","MODERATE.RECREATIONAL.ACTIVITIES.2")
vlabel<-c(vlabel,"MODERATE.RECREATIONAL.ACTIVITIES"," 1"," 2")
vname<-
c(vname,"DAYS.MODERATE.RECREATIONAL.ACTIVITIES","DAYS.MODERATE.RECRE
ATIONAL.ACTIVITIES.1","DAYS.MODERATE.RECREATIONAL.ACTIVITIES.2","DAYS.M
ODERATE.RECREATIONAL.ACTIVITIES.3","DAYS.MODERATE.RECREATIONAL.ACTIV
ITIES.4","DAYS.MODERATE.RECREATIONAL.ACTIVITIES.5","DAYS.MODERATE.RECR
EATIONAL.ACTIVITIES.6","DAYS.MODERATE.RECREATIONAL.ACTIVITIES.7","DAYS.
MODERATE.RECREATIONAL.ACTIVITIES.99")
vlabel<-c(vlabel,"DAYS.MODERATE.RECREATIONAL.ACTIVITIES"," 1"," 2"," 3","
4"," 5"," 6"," 7"," 99")
vname<-c(vname,"MINUTES.MODERATE.RECREATIONAL.ACTIVITIES")
vlabel<-c(vlabel,"MINUTES.MODERATE.RECREATIONAL.ACTIVITIES")
vname<-c(vname,"ACTIVITY","ACTIVITY.1","ACTIVITY.2","ACTIVITY.3")
vlabel<-c(vlabel,"ACTIVITY"," 1"," 2"," 3")
vname<-c(vname,"DRINK","DRINK.1","DRINK.2","BODY.MASS.INDEX..KG.M..2.")
vlabel<-c(vlabel,"DRINK"," 1"," 2","BODY.MASS.INDEX..KG.M..2.")
vname<-c(vname,"WAIST.CIRCUMFERENCE..CM.", "ENERGY..KCAL.")
vlabel<-c(vlabel,"WAIST.CIRCUMFERENCE..CM.", "ENERGY..KCAL.")

```

```

vname<-c(vname,"OBESITY","OBESITY.1","OBESITY.2","ENERGY..1000KCAL.")
vlabel<-c(vlabel,"OBESITY"," 1"," 2","ENERGY..1000KCAL.")
vname<-c(vname,"SII.Q4","SII.Q4.0","SII.Q4.1","SII.Q4.2","SII.Q4.3")
vname<-c(vname,"OBESITY.NEW","OBESITY.NEW.0","OBESITY.NEW.1")
vlabel<-c(vlabel,"OBESITY NEW"," 0"," 1")
slt.vname<-c()

library(gdata,lib.loc=R.LibLocation)
library(geepack,lib.loc=R.LibLocation)
library(mgcv,lib.loc=R.LibLocation)

ofname<-"PROJ3_6_tbl";
WD<-EmpowerStatsR; wd.subset="";
svy.DSN.YN <- FALSE;
weights<-WD$WTMECPRP;weights.var <- 'wtmecprp';
WD<-cbind(WD,weights); WD<-WD[!is.na(weights),];
attach(WD)
subjvname<-NA;
yv<-cbind(WAIST.CIRCUMFERENCE..CM.);
yvname<-c('WAIST.CIRCUMFERENCE..CM. ');
yvar<-c('WAIST_CIRCUMFERENCE__CM_ ');
ydist<-c('gaussian');
ylink<-c('identity');
ylv<-c(0);
xv<-cbind(SII.Q4);
xvname<-c('SII.Q4');
xvar<-c('SII_Q4');
xlv<-c(4);
sxf<-c(NA,0)[-1];
sv<-
cbind(GENDER,AGE,RACE,EDUCATION.LEVEL,MARITAL.STATUS,PIR,SMOKE,SLEEP.D
ISORDER,ACTIVITY,DRINK,ENERGY..1000KCAL.);
svname<-
c('GENDER','AGE','RACE','EDUCATION.LEVEL','MARITAL.STATUS','PIR','SMOKE','SLEEP
.DISORDER','ACTIVITY','DRINK','ENERGY..1000KCAL. ');
svar<-
c('GENDER','AGE','RACE','EDUCATION_LEVEL','MARITAL_STATUS','PIR','SMOKE','SLEE
P_DISORDER','ACTIVITY','DRINK','ENERGY__1000KCAL_ ');
sdf<-c(NA,0,0,0,0,0,0,0,0,0,0)[-1];
slv<-c(2,0,4,3,3,3,3,2,3,2,0);
av<-cbind(GENDER,AGE,RACE);
avname<-c('GENDER','AGE','RACE');
if (!is.na(avname[1])) avlbl<-vlabel[match(avname, vname)];
nadj<-length(avname);alv<-c(2,0,4);

```

```

saf<-c(NA,0,0,0)[-1];
timev<-NA; timevname<-NA;
bv<-NA; bvar<-NA;
colv<-NA; colvname<-NA;
v.start<-NA; vname.start<-NA;
v.stop<-NA; vname.stop<-NA;
par1<-1;dec<-2;parm<-c(1,NA, 1,1, 0);
if (!exists("pdfwd")) pdfwd<-6;
if (!exists("pdfht")) pdfht<-6;
##R package## gdata geepack mgcv ##R package##;
pvformat<-function(p,dec) {
  pp <- sprintf(paste("%.",dec,"f",sep=""),as.numeric(p))
  if (is.matrix(p)) {pp<-matrix(pp, nrow=nrow(p)); colnames(pp)<-colnames(p);rownames(pp)<-
rownames(p);}
  lw <- paste("<",substr("0.0000000000",1,dec+1),"1",sep="");
  pp[as.numeric(p)<(1/10^dec)]<-lw
  return(pp)
}
numfmt<-function(p,dec) {
  if (is.list(p)) p<-as.matrix(p)
  pp <- sprintf(paste("%.",dec,"f",sep=""),as.numeric(p))
  if (is.matrix(p)) {pp<-matrix(pp, nrow=nrow(p));colnames(pp)<-colnames(p);rownames(pp)<-
rownames(p);}
  pp[as.numeric(p)>10000000]<- "inf."
  pp[is.na(p) | gsub(" ",",",p)==""]<- ""
  pp[p=="-Inf"]<-"-Inf"
  pp[p=="Inf"]<-"Inf"
  return(pp)
}

varstats<-function(var,vlvl,dec) {
  if (length(vlvl)==1 & vlvl[1]==0) {

return(paste(numfmt(mean(var,na.rm=TRUE),dec),numfmt(sd(var,na.rm=TRUE),dec),sep="+"))
  } else {
  a<-table(var)
  b<-matrix(paste(a, " (", numfmt(a/sum(a)*100,dec), "%)",sep=""),ncol=1)
  return(c(" ",b[match(vlvl, names(a))]))
  }
}

mat2htmltable<-function(mat) {
  t1<- apply(mat,1,function(z) paste(z,collapse="</td><td>"))
  t2<- paste("<tr><td>",t1,"</td></tr>")
  return(paste(t2,collapse=" "))
}

```

```

}
setgam<-function(fml,yi) {
  if (ydist[yi]== "") ydist[yi]<-"gaussian"
  if (ydist[yi]=="exact") ydist[yi]<-"binomial"
  if (ydist[yi]=="breslow") ydist[yi]<-"binomial"
  if (ydist[yi]=="gaussian") mdl<-try(gam(formula(fml),weights=wdtmp$weights,data=wdtmp,
family=gaussian(link="identity")))
  if (ydist[yi]=="binomial") mdl<-try(gam(formula(fml),weights=wdtmp$weights,data=wdtmp,
family=binomial(link="logit")))
  if (ydist[yi]=="poisson") mdl<-try(gam(formula(fml),weights=wdtmp$weights,data=wdtmp,
family=poisson(link="log")))
  if (ydist[yi]=="gamma") mdl<-try(gam(formula(fml),weights=wdtmp$weights,data=wdtmp,
family=Gamma(link="inverse")))
  if (ydist[yi]=="negbin") mdl<-try(gam(formula(fml),weights=wdtmp$weights,data=wdtmp,
family=negbin(c(1,10), link="log")))
  return(mdl)
}
setgee<-function(fml,yi) {
  if (ydist[yi]== "") ydist[yi]<-"gaussian"
  if (ydist[yi]=="exact") ydist[yi]<-"binomial"
  if (ydist[yi]=="breslow") ydist[yi]<-"binomial"
  if
      (ydist[yi]=="gaussian")
      mdl<-
try(geeglm(formula(fml),id=wdtmp[,subjvname],corstr=gee.TYPE,family="gaussian",weights=w
dtmp$weights,data=wdtmp))
  if
      (ydist[yi]=="binomial")
      mdl<-
try(geeglm(formula(fml),id=wdtmp[,subjvname],corstr=gee.TYPE,family="binomial",weights=w
dtmp$weights,data=wdtmp))
  if
      (ydist[yi]=="poisson")
      mdl<-
try(geeglm(formula(fml),id=wdtmp[,subjvname],corstr=gee.TYPE,family="poisson",weights=wdt
mp$weights,data=wdtmp))
  if
      (ydist[yi]=="gamma")
      mdl<-
try(geeglm(formula(fml),id=wdtmp[,subjvname],corstr=gee.TYPE,family="Gamma",weights=wd
tmp$weights,data=wdtmp))
  if
      (ydist[yi]=="negbin")
      mdl<-
try(geeglm.nb(formula(fml),id=wdtmp[,subjvname],corstr=gee.TYPE,weights=wdtmp$weights,da
ta=wdtmp))
  return(md)
}
setglm<-function(fml,yi) {
  if (ydist[yi]== "") ydist[yi]<-"gaussian"
  if (ydist[yi]=="exact") ydist[yi]<-"binomial"
  if (ydist[yi]=="breslow") ydist[yi]<-"binomial"
  if
      (ydist[yi]=="gaussian")
      mdl<-
try(glm(formula(fml),family="gaussian",weights=wdtmp$weights,data=wdtmp))

```



```

    if (ydist[yi]=="binomial") md<-
try(glm(formula(fml),family="binomial",weights=wdtmp$weights,data=wdtmp))
    if (ydist[yi]=="poisson") md<-
try(glm(formula(fml),family="poisson",weights=wdtmp$weights,data=wdtmp))
    if (ydist[yi]=="gamma") md<-
try(glm(formula(fml),family="Gamma",weights=wdtmp$weights,data=wdtmp))
    if (ydist[yi]=="negbin") md<-try(glm.nb(formula(fml),weights=wdtmp$weights,data=wdtmp))
    return(md)
}
mdl2oo<-function(mdl, xxname, opt) {
  if (is.na(mdl[[1]][1])) return(list(rep("",times=length(xxname)), ""))
  if (substr(mdl[[1]][1],1,5)=="Error") return(list(rep("",times=length(xxname)), ""))
  gs<-summary(mdl); print(mdl$formula); print(gs)
  if (opt=="gam") {gsparm <- gs$p.table;tmpn<-gs$n;
} else {gsparm <- gs$coefficients;tmpn <- sum(gs$df[c(1,2)]);}
  gsp<-gsparm[match(xxname,rownames(gsparm)),]
  if (length(xxname)==1) {beta<-gsp[1]; se<-gsp[2]; pv<-gsp[4];
} else {beta<-gsp[,1]; se<-gsp[,2]; pv<-gsp[,4]; }
  ci1<- beta-1.96*se; ci2<- beta+1.96*se
  pvx<-substr(rep("****",length(pv)),1,(pv<=0.05)+(pv<=0.01)+(pv<=0.001))
  if (colprn==3) {pvv<-pvx;} else {pvv<-pvformat(pv,dec+2);}
  if ((colprn!=2) & (gs$family[[2]]=="log" | gs$family[[2]]=="logit")) {
    o1<-paste(numfmt(exp(beta),dec)," (" ,numfmt(exp(ci1),dec),"
,numfmt(exp(ci2),dec),")",sep="")
  } else {
    if (colprn<3) {o1<-paste(numfmt(beta,dec), " (" ,numfmt(ci1,dec),"
,numfmt(ci2,dec),")",sep="")
  } else {o1<-paste(numfmt(beta,dec), "+",numfmt(se,dec),sep="");}
  }
  o1<-paste(o1,pvv); o1[is.na(beta)]<-NA
  if (length(xxname)>1) {
    if (gs$family[[2]]=="log" | gs$family[[2]]=="logit") {
      o1[is.na(o1) & substr(xxname,1,7)=="factor("<- "1.0"
    } else {o1[is.na(o1) & substr(xxname,1,7)=="factor("<- "0";}
    o1[is.na(o1)]<-"";
  }
  return(list(o1,tmpn))
}
recodevar <- function (var,oldcode,newcode) {
  tmp.v <- var
  nc.tmp <- length(oldcode)
  for (i in (1:nc.tmp)) {tmp.v[(var==oldcode[i])]=newcode[i]}
  if (is.factor(tmp.v)) {tmp.v1<-as.numeric(as.character(tmp.v))} else {tmp.v1<-
as.numeric(tmp.v)}

```

```

    rm(tmp.v); return(tmp.v1)
}
rankvar <- function(var, num) {
  qprobs <- 1/num
  if (num>2) {for (i in (2:(num-1))) {qprobs <- c(qprobs, 1/num * i) } }
  outvar <- rep(0, times=length(var))
  outvar[is.na(var)] <- NA
  cutpoints <- quantile(var,probs=qprobs, na.rm=TRUE)
  for (k in (1:length(cutpoints))) { outvar[var>=cutpoints[k]] <- k; }
  return(outvar)
}
removeNA<-function(i,j,m,wdf) {
  vvv<-c(yvname[i],adjvv[[m]],subjvname,colvname,bvar,vname.start,vname.stop,timevname);
  if (j<=nx) {vvv<-c(vvv,xvname[j]);} else {vvv<-c(vvv,xvname);}
  vvv<-vvv[!is.na(vvv)]; vvv<-vvv[vvv>" "]
  tmp<-is.na(wdf[,vvv]);
  return(wdf[apply(tmp,1,sum)==0,])
}
vlabelN<- (substr(vlabel,1,1)==" ");
vlabelZ<-vlabel[vlabelN];vlabelV<-vlabel[!vlabelN]
vnameV<-vname[!vlabelN];vnameZ<-vname[vlabelN]
w<-c("<html><head>","<meta http-equiv=\"Content-Type\" content=\"text/html\"
charset=\"gb2312\" /></head><body>")
if (!is.na(avname[1])) {
  if (sum((saf=="s" | saf=="S") & alv>0)>0) w<-c(w,"<br>Spline smoothing only applies for
continuous variables")
  if (!is.na(subjvname) & (sum((saf=="s" | saf=="S") & alv==0)>0)) w<-c(w,"<br>Generalized
estimate equation could not be used with spline smoothing terms")
}
if (!is.na(svname[1])) {
  if (sum((sdf=="s" | sdf=="S") & slv>0)>0) w<-c(w,"<br>Spline smoothing only applies for
continuous variables")
  if (!is.na(subjvname) & (sum((sdf=="s" | sdf=="S") & slv==0)>0)) w<-c(w,"<br>Generalized
estimate equation could not be used with spline smoothing terms")
}
allvname<-
c(yvname,xvname,colvname,bvar,avname,svname,subjvname,vname.start,vname.stop,timevname,
"weights");
allvname<-allvname[!is.na(allvname)]
WD<-WD[,allvname];
if (!is.na(subjvname)) WD<-WD[order(WD[,subjvname]),]
if (!is.na(sxf[1])) {
  if (sum(sxf>1 & xlv>0)>0) w<-c(w,"Categorizing only applies to continuous variables");
  if (sum(sxf>1 & xlv==0)>0) {

```

```

t.xname<-NA;t.xlv<-NA; nx<-length(xvname)
for (i in 1:nx) {
  if (sxf[i]>1 & xlv[i]==0) {
    tmp.Xi<- rankvar(WD[,xvname[i]],sxf[i])
    tmp.newcode <- tapply(WD[,xvname[i]],tmp.Xi,function(z) median(z,na.rm=TRUE))
    tmp.low <- tapply(WD[,xvname[i]],tmp.Xi,function(z) min(z,na.rm=TRUE))
    tmp.upp <- tapply(WD[,xvname[i]],tmp.Xi,function(z) max(z,na.rm=TRUE))
    tmp.Xi2<- recodevar(tmp.Xi,(1:sxf[i])-1,tmp.newcode)
    tmp.Xi<-cbind(tmp.Xi,tmp.Xi2)
    tmp.NM<-paste(xvname[i],c("grp","grp.cont"),sep=".")
    colnames(tmp.Xi)<-tmp.NM
    WD<-cbind(WD,tmp.Xi)
    t.xname<-c(t.xname,tmp.NM)
    t.xlv<-c(t.xlv,sxf[i],0)
    vnameV<-c(vnameV,tmp.NM)
    vlabelV<-c(vlabelV,paste(vlabelV[vnameV==xvname[i]],c("group","group trend")))
    vnameZ<-c(vnameZ,paste(tmp.NM[1],(1:sxf[i])-1,sep="."))
    vlabelZ<-c(vlabelZ,paste(tmp.low,"-",tmp.upp))
  } else {
    t.xname<-c(t.xname,xvname[i]); t.xlv<-c(t.xlv,xlv[i])
  }
}
xvname<-t.xname[-1]; xlv<-t.xlv[-1];
}
rm(xv,yv,bv,av,sv,colv,v.start,v.stop)
if (!is.na(subjvname)) {
  if (!is.na(avname[1])) saf<-rep(0,length(saf));
  if (!is.na(svname[1])) sdf<-rep(0,length(sdf));
  WD<-WD[order(WD[,subjvname]),];
}
fmlm<-" "; fmlb<-"Non-adjusted"; tmp<-""; adjv<-list(NA); adjvb<-"None";
fmlp<-ifelse(!is.na(subjvname), "gee", "glm");
na=0; avb=""; smoothav<-0; nadjm<-0
if (!is.na(avname[1])) {
  na<-length(avname)
  avb<-vlabelV[match(avname,vnameV)];
  avname_ <- avname
  smoothavi<-((saf=="s" | saf=="S") & alv==0)
  smoothav<-sum(smoothavi)
  smoothavname<-avname[smoothavi]
  avname_[smoothavi]<-paste("s",avname[smoothavi],"),",sep="")
  avb1<-avb
  avb1[smoothavi]<-paste(avb[smoothavi],"(Smooth)",sep="")
}

```

```

avname_[alv>0]<-paste("factor(",avname[alv>0],")",sep="")
fmlm<-c(fmlm,paste("+",paste(avname_,collapse="+")))
fmlb<-c(fmlb,"Adjust")
nadjm<-nadjm+1; tmp<-c(tmp,"I"); adjvv[[nadjm+1]]<-avname;
adjvb<-c(adjvb, paste(avb1, collapse="; "))
fmlp<-c(fmlp,ifelse(!is.na(subjvname), "gee", ifelse(smoothav>0, "gam", "glm")))
}
ns=0; svb=""; smoothsv<-0
if (!is.na(svname[1])) {
  svb<-vlabelV[match(svname,vnameV)];
  svname_ <- svname
  smoothsvi<-((sdf=="s" | sdf=="S") & slv==0)
  smoothsv<-sum(smoothsvi)
  smoothsvname<-svname[smoothsvi]
  svname_[smoothsvi]<-paste("s(",svname[smoothsvi],")",sep="")
  svb1<-svb
  svb1[smoothsvi]<-paste(svb[smoothsvi],"(Smooth)",sep="")
  svname_[slv>0]<-paste("factor(",svname[slv>0],")",sep="")
  fmlm<-c(fmlm,paste("+",paste(svname_,collapse="+")))
  fmlb<-c(fmlb,"Adjust")
  nadjm<-nadjm+1; tmp<-c(tmp,"II"); adjvv[[nadjm+1]]<-svname
  adjvb<-c(adjvb, paste(svb1, collapse="; "))
  fmlp<-c(fmlp,ifelse(!is.na(subjvname), "gee", ifelse(smoothsv>0, "gam", "glm")))
}
if (is.na(parm[1]) & length(fmlm)>1) {
  fmlm<-fmlm[-1]; fmlb<-fmlb[-1]; tmp<-tmp[-1]; adjvv<-adjvv[-1]; adjvb<-adjvb[-1]; fmlp<-
  fmlp[-1];
}
if (nadjm>1) fmlb<-paste(fmlb,tmp)
nmdl<-length(fmlm)

ny=length(yvname); nx=length(xvname);
xb<-vlabelV[match(xvname,vnameV)]; xb[is.na(xb)]<-xvname[is.na(xb)]
yb<-vlabelV[match(yvname,vnameV)]; yb[is.na(yb)]<-yvname[is.na(yb)]
xvname_ <- xvname
xvname_[xlv>0]<-paste("factor(",xvname[xlv>0],")",sep="")
xxname_<-list(NA); xxlbl_<-list(NA); xxlvl_<-list(NA)
for (j in (1:nx)) {
  if (xlv[j]==0) {
    xxname_[[j+1]]<-xvname[j];xxlbl_[[j+1]]<-xb[j];xxlvl_[[j+1]]<-0
  } else {
    xxlvl_[[j+1]]<-levels(factor(WD[xvname[j]]))
    tmp<-paste(xvname[j],".",xxlvl_[[j+1]],sep="")
    xxlbl_[[j+1]]<-c(xb[j],vlabelZ[match(tmp,vnameZ)])
  }
}

```

```

        xxlbl__[j+1]<-paste(c("",rep("&nbsp;&nbsp; ",length(xxlbl__[j+1])-1)),xxlbl__[j+1])
        xxname__[j+1]<-c(xvname[j],paste("factor(",xvname[j],")",xxlvl__[j+1],sep=""))
    }
}
xxname_<-xxname_[-1]; xxlbl_<-xxlbl_[-1]; xxlvl_<-xxlvl_[-1];
if (nx==1) par1<-1;
if (is.na(par1)) par1<-1;
if (par1>1) {
    tmp1<-xxname_[[1]]; tmp2<-xxlbl_[[1]]
    for (j in 2:nx) {tmp1<-c(tmp1,xxname_[j]); tmp2<-c(tmp2,xxlbl_[j]);}
    xxname_[[nx+1]]<-tmp1; xxlbl_[[nx+1]]<-tmp2;
    xvname_<-c(xvname_,paste(xvname_,collapse="+"))
}
contx<-(!sum(xlv>0))==0
if (par1==3 & !is.na(bvar)) {w<-c(w,"<br>Column stratified variable was ignored"); bvar<-NA;
bvname<-NA;}

if (is.na(bvar) & !is.na(colvname) & nmdl==1 & par1!=3) {if ((ny==1) | (nx==1 & contx)) {bvar<-
colvname; colvname<-NA;}}
if (is.na(colvname)) {
    nclv<-1; clvb<-"Total"; clvb_<- "Total"
} else {
    clv<-levels(factor(WD[,colvname])); nclv<-length(clv)+1
    clvb_<-vlabelZ[match(paste(colvname, ".",clv,sep=""),vnameZ)];           clvb_[is.na(clvb_)]<-
clv[is.na(clvb_)];
    clvb<-c(paste(vlabelV[vnameV==colvname],clvb_,sep="="),"Total");
    clvb_<-c(clvb_,"Total")
    WD<-WD[!is.na(WD[,colvname]),]
}
if (is.na(bvar)) {
    blvb<-"Total"; blvb_<- "Total"
} else {
    blv<-levels(factor(WD[,bvar])); nblv<-length(blv)+1
    blvb_<-vlabelZ[match(paste(bvar, ".",blv,sep=""),vnameZ)];           blvb_[is.na(blvb_)]<-
blv[is.na(blvb_)];
    blvb<-c(paste(vlabelV[vnameV==bvar],blvb_,sep="="),"Total");
    blvb_<-c(blvb_,"Total")
    WD<-WD[!is.na(WD[,bvar]),]
}
aa<-c(1,2,3,4)
for (i in 1:4) {
    for (j in c(1:4)[-i]) {
        for (k in c(1:4)[-c(i,j)]) aa<-rbind(aa,c(i,j,k,c(1:4)[-c(i,j,k)]))
    }
}

```

```

}
if (is.na(parm[4])) parm[4]<-1
rord<-aa[parm[4],]
if (!is.na(bvar)) {prn<-"S";
} else {
  if (parm[4]>1) {
    rordc<-ifelse(rord[4]==1,3,4)
    prn<-c("G","Y","M","X")[rord[rordc]]
    if (prn=="X") {
      if (!contx & nx>1) prn<-ifelse(nmdl>1, "M", ifelse(ny>nx & contx, "X", "Y"))
      if (!contx & nx==1) prn<-"CX"
      if (par1==2) {tmp<-ifelse(rordc==4,ifelse(rord[3]==1,2,3),2); prn<-
c("G","Y","M","X")[rord[tmp]];}
    }
  } else {
    prn<-ifelse(nmdl>1, "M", ifelse(ny>nx & contx, "X", "Y"))
    if (par1==2) prn<-ifelse(nmdl>1, "M", "Y")
  }
  if (par1==3) prn<-"UM"
}
colprn<-parm[3];
sink(paste(ofname, ".lst", sep=""))
if (par1==2) {xbgn<-nx+1; xend<-nx+1;} else {xbgn<-1; xend<-nx;}
if (prn=="Y") {
  tt<-c(0,0,0,0,"Exposure",yb); nn<-c(0,0,0,0,yb);
  for (k in (1:nclv)) {
    wdtmp0<-WD;
    if (!is.na(colvname)) {
      if (k<nclv) wdtmp0<-WD[WD[,colvname]==clv[k],];
      print(paste("Stratified by",colvname, ":", clvb[k]))
    }
    for (m in 1:nmdl) {
      for (j in (xbgn:xend)) {
        colj<-cbind(k,0,m,j,xxlbl_[[j]])
        nnj <-c(k,0,m,j)
        for (i in (1:ny)) {
          fml<-paste(yvname[i],"~",xvname_[j],fmlm[m]);
          wdtmp<-removeNA(i,j,m,wdtmp0)
          if (!is.na(colvname)) {if (k==nclv) fml<-paste(fml,"+factor(",colvname,")",sep="");}
          if (fmlp[m]=="gam") tmp.mdl<-setgam(fml,i)
          if (fmlp[m]=="gee") tmp.mdl<-setgee(fml,i)
          if (fmlp[m]=="glm") tmp.mdl<-setglm(fml,i)
          tmppooi<-mdl2oo(tmp.mdl,xxname_[[j]],fmlp[m])
          colj<-cbind(colj,tmppooi[[1]]); nnj<-c(nnj,tmppooi[[2]])

```

```

    }
    tt<-rbind(tt,colj); nn<-rbind(nn,nnj)
  }
}
}
}
if (prn=="S") {
  tt<-c(0,0,0,0,"Exposure",blvb); nn<-c(0,0,0,0,blvb);
  for (k in (1:nclv)) {
    wdtmp0<-WD;
    if (!is.na(colvname)) {
      if (k<nclv) wdtmp0<-WD[WD[,colvname]==clv[k],];
      print(paste("Stratified by",colvname, ":", clvb[k]))
    }
    for (i in (1:ny)) {
      for (m in 1:nmdl) {
        for (j in (xbgn:xend)) {
          colj<-cbind(k,i,m,j,xxlbl_[[j]]);
          nnj <- c(k,i,m,j)
          for (b in (1:nblv)) {
            print(paste("Stratified by",bvar, ":", blvb[b]))
            fml<-paste(yvname[i],"~",xvname_[j],fmlm[m]);
            if (b<nblv) {
              wdtmp1<-wdtmp0[wdtmp0[,bvar]==blv[b],];
            } else {
              wdtmp1<-wdtmp0; fml<-paste(fml,"+factor(",bvar,")",sep="");
            }
            wdtmp<-removeNA(i,j,m,wdtmp1)
            if (!is.na(colvname)) {if (k==nclv) fml<-paste(fml,"+factor(",colvname,")",sep="");}
            if (fmlp[m]=="gam") tmp.mdl<-setgam(fml,i)
            if (fmlp[m]=="gee") tmp.mdl<-setgee(fml,i)
            if (fmlp[m]=="glm") tmp.mdl<-setglm(fml,i)
            tmppooi<-mdl2oo(tmp.mdl,xxname_[[j]],fmlp[m])
            colj<-cbind(colj,tmppooi[[1]]); nnj<-c(nnj,tmppooi[[2]])
          }
          tt<-rbind(tt,colj); nn<-rbind(nn,nnj)
        }
      }
    }
  }
}
}
}
if (prn=="M") {
  tt<-c(0,0,0,0,"Exposure",fmlb); nn<-c(0,0,0,0,fmlb)
  for (k in (1:nclv)) {

```

```

wdtmp0<-WD;
if (!is.na(colvname)) {
  if (k<nclv) wdtmp0<-WD[WD[,colvname]==clv[k],];
  print(paste("Stratified by",colvname, ":", clvb[k]))
}
for (i in 1:ny) {
  for (j in xbg:xend) {
    colj<-cbind(k,i,0,j,xxlbl_[[j]]); nnj<-c(k,i,0,j)
    for (m in 1:nmdl) {
      fml<-paste(yvname[i],"~",xvname_[j],fmlm[m]);
      wdtmp<-removeNA(i,j,m,wdtmp0)
      if (!is.na(colvname)) {if (k==nclv) fml<-paste(fml,"+factor(",colvname,")",sep="");}
      if (fmlp[m]=="gam") tmp.mdl<-setgam(fml,i)
      if (fmlp[m]=="gee") tmp.mdl<-setgee(fml,i)
      if (fmlp[m]=="glm") tmp.mdl<-setglm(fml,i)
      tmppoi<-mdl2oo(tmp.mdl,xxname_[[j]],fmlp[m])
      colj<-cbind(colj,tmppoi[[1]]); nnj<-c(nnj,tmppoi[[2]])
    }
    tt<-rbind(tt,colj); nn<-rbind(nn,nnj)
  }
}
}
}
if (prn=="X") {
  tt<-c(0,0,0,0,"Outcome",xb); nn<-c(0,0,0,0,xb);
  for (k in (1:nclv)) {
    wdtmp0<-WD;
    if (!is.na(colvname)) {
      if (k<nclv) wdtmp0<-WD[WD[,colvname]==clv[k],];
      print(paste("Stratified by",colvname, ":", clvb[k]))
    }
    for (m in 1:nmdl) {
      for (i in (1:ny)) {
        colj<-cbind(k,i,m,0,yb[i])
        nnj <-c(k,i,m,0)
        for (j in (1:nx)) {
          fml<-paste(yvname[i],"~",xvname_[j],fmlm[m]);
          wdtmp<-removeNA(i,j,m,wdtmp0)
          if (!is.na(colvname)) {if (k==nclv) fml<-paste(fml,"+factor(",colvname,")",sep="");}
          if (fmlp[m]=="gam") tmp.mdl<-setgam(fml,i)
          if (fmlp[m]=="gee") tmp.mdl<-setgee(fml,i)
          if (fmlp[m]=="glm") tmp.mdl<-setglm(fml,i)
          tmppoi<-mdl2oo(tmp.mdl,xxname_[[j]],fmlp[m])
          colj<-cbind(colj,tmppoi[[1]]); nnj<-c(nnj,tmppoi[[2]])
        }
      }
    }
  }
}

```



```

    }
    tt<-rbind(tt,colj); nn<-rbind(nn,nnj)
  }
}
}
}
if (prn=="CX") {
  tt<-c(0,0,0,0,"Outcome",xxlbl_[[1]][-1]); nn<-c(0,0,0,0,xb[1]);
  nxl<-length(xxlbl_[[1]])-1
  for (k in (1:nclv)) {
    wdtmp0<-WD;
    if (!is.na(colvname)) {
      if (k<nclv) wdtmp0<-WD[WD[,colvname]==clv[k],];
      print(paste("Stratified by",colvname, ":", clvb[k]))
    }
    for (m in 1:nmdl) {
      for (i in (1:ny)) {
        colj<-c(k,i,m,0,yb[i])
        nnj <-c(k,i,m,0)
        fml<-paste(yvname[i],"~",xvname_[1],fmlm[m]);
        wdtmp<-removeNA(i,1,m,wdtmp0)
        if (!is.na(colvname)) {if (k==nclv) fml<-paste(fml,"+factor(",colvname,")",sep="");}
        if (fmlp[m]=="gam") tmp.mdl<-setgam(fml,i)
        if (fmlp[m]=="gee") tmp.mdl<-setgee(fml,i)
        if (fmlp[m]=="glm") tmp.mdl<-setglm(fml,i)
        tmppoi<-mdl2oo(tmp.mdl,xxname_[[1]],fmlp[m])
        colj<-c(colj,tmppoi[[1]][-1]); nnj<-c(nnj,tmppoi[[2]])
        tt<-rbind(tt,colj); nn<-rbind(nn,nnj)
      }
    }
  }
}
}
}
if (prn=="UM") {
  tt<-c(0,0,0,0,"Exposure","Univariable","Multivariable");
  nn<-
c(0,0,0,0,"Univariable","Multivariable")
  for (k in (1:nclv)) {
    wdtmp0<-WD;
    if (!is.na(colvname)) {
      if (k<nclv) wdtmp0<-WD[WD[,colvname]==clv[k],];
      print(paste("Stratified by",colvname, ":", clvb[k]))
    }
    for (i in 1:ny) {
      for (m in 1:nmdl) {
        colm<-rep(NA,6); nnm<-rep(NA,5)

```

```

for (j in 1:(nx+1)) {
  colj<-cbind(k,i,m,j,xxlbl_[[j]]); nnj<-c(k,i,m,j)
  fml<-paste(yvname[i],"~",xvname_[j],fmlm[m]);
  wdtmp<-removeNA(i,j,m,wdtmp0)
  if (!is.na(colvname)) {if (k==nc1v) fml<-paste(fml,"+factor(",colvname,")",sep="");}
  if (fmlp[m]=="gam") tmp.mdl<-setgam(fml,i)
  if (fmlp[m]=="gee") tmp.mdl<-setgee(fml,i)
  if (fmlp[m]=="glm") tmp.mdl<-setglm(fml,i)
  tmppooi<-mdl2oo(tmp.mdl,xxname_[[j]],fmlp[m])
  colj<-cbind(colj,tmppooi[[1]]); nnj<-c(nnj,tmppooi[[2]])
  if (j<=nx) {colm<-rbind(colm,colj); nnm<-rbind(nnm,nnj);
  } else {colm<-cbind(colm[-1,],tmppooi[[1]]); nnm<-cbind(nnm[-1,],tmppooi[[2]]);}
  }
  tt<-rbind(tt,colm); nn<-rbind(nn,nnm)
}
}
}
}
sink()
if (!contx & prn!="CX") rord<-c(rord[rord!=4],4)
if (prn=="X" | prn=="CX") rord<-rord[rord!=4]
if (prn=="Y") rord<-rord[rord!=2]
if (prn=="M") rord<-rord[rord!=3]
if (nx==1 & contx) rord<-rord[rord!=4]
if (nmdl==1) rord<-rord[rord!=3]
if (ny==1) rord<-rord[rord!=2]
if (is.na(colvname)) rord<-rord[rord!=1]
if (length(rord)==0) rord<-1
nrr<-length(rord)
for (i in nrr:1) {nn<-nn[order(as.numeric(nn[,rord[i]])),];tt<-tt[order(as.numeric(tt[,rord[i]])),];}
if (nn[2,4]>0) {nn[,4]<-c("Exposure",xb[as.numeric(nn[-1,4])]); } else {nn<-nn[,-4];}
if (nn[2,3]>0) {nn[,3]<-c("Model",fmlb[as.numeric(nn[-1,3])]); } else {nn<-nn[,-3];}
if (nn[2,2]>0) {nn[,2]<-c("Outcome",yb[as.numeric(nn[-1,2])]); } else {nn<-nn[,-2];}
if (!is.na(colvname)) {nn[,1]<-c(vlabel[vname==colvname],clvb_[as.numeric(nn[-1,1])]);} else
{nn<-nn[,-1];}
tb<-matrix(as.numeric(tt[,c(1:4)]),ncol=4);
if (!is.na(colvname)) {tt[,1]<-c(vlabelV[vnameV==colvname],clvb[tb[-1,1]]);}
if (ny>1) {tt[,2]<-c("Outcome",yb[tb[-1,2]]);}
if (nmdl>1) {tt[,3]<-c("Model",fmlb[tb[-1,3]]);}
nrr1<-nrr-1; oo<-tt[1,]; nc<-ncol(tt)-5; nr<-nrow(tt)
for (i in 2:nr) {
  if (nrr>1) {
    for (j in 1:nrr1) {
      if (tb[i,rord[j]]!=tb[i-1,rord[j]]) oo<-rbind(oo,c(rep(tt[i,rord[j]],5),rep(" ",nc)))
    }
  }
}

```

```

    }
  }
  oo<-rbind(oo,tt[i,])
}
if (rord[nrr]!=4 & tt[1,rord[nrr]]!="0") {oo<-cbind(oo[,rord[nrr]],oo[-(1:5)]);} else {oo<-oo[-(1:4)]}
w<-c(w,paste("<h2>", title, "</h2>"))
w<-c(w,"<br><table border=3>", mat2htmltable(oo), "</table>")
prnopt<-c("β (95%CI) Pvalue / OR (95%CI) Pvalue", "β (95%CI) Pvalue", "β+se / OR (95%CI)
**P<0.05 ***P<0.01 ****P<0.001")

for (m in 1:nmdl) w<-c(w,paste("<br>",fmlb[m],"model adjust for:", adjvb[m]))
if (smoothav>0 | smoothsv>0) w<-c(w,". Generalized additive models were applied")
if (!is.na(subjvname)) w<-c(w, paste("<br>Generalized estimate equation were used, subject ID=",
subjvname, "(", gee.TYPE,")",sep=""))

```

```

R.Version4RUN<-343;
R.LibLocation <- "C:/Users/15949/AppData/Roaming/EmpowerRCH/R343/library"
##### Regarding ALL Following R Functions #####
##### COPYRIGHT (c) 2010 X&Y Solutions, ALL RIGHT RESERVED #####
##### www.EmpowerStats.com #####
#####

Sys.setlocale("LC_TIME", "C")
library(doBy,lib.loc=R.LibLocation)
library(plotrix,lib.loc=R.LibLocation)
library(stringi,lib.loc=R.LibLocation)
library(stringr,lib.loc=R.LibLocation)
library(survival,lib.loc=R.LibLocation)
library(rms,lib.loc=R.LibLocation)
library(nnet,lib.loc=R.LibLocation)
library(car,lib.loc=R.LibLocation)
library(mgcv,lib.loc=R.LibLocation)
pdfwd<-6; pdfht<-6
setwd("C:/Users/15949/Desktop/Obesity/PROJ3_7_tbl1")
load("C:/Users/15949/Desktop/Obesity/SIIobesityAA.Rdata")
if (length(which(ls()=="EmpowerStatsR"))==0) EmpowerStatsR<-get(ls()[1])
names(EmpowerStatsR)<-toupper(names(EmpowerStatsR))

```

```

rankvar <- function(var, num) {
  qprobs <- 1/num
  if (num>2) {for (i in (2:(num-1))) {qprobs <- c(qprobs, 1/num * i) }}
}

```

```

outvar <- rep(0, times=length(var))
outvar[is.na(var)] <- NA
cutpoints <- quantile(var, probs=qprobs, na.rm=TRUE)
for (k in (1:length(cutpoints))) {outvar[var>=cutpoints[k]] <- k}
tmp<-c(min(var, na.rm=TRUE), cutpoints, max(var, na.rm=TRUE))
names(tmp)<-c("Min", names(cutpoints), "Max")
print(tmp)
return(outvar)
}

recodevar <- function (var, oldcode, newcode) {
  tmp.v <- var
  nc.tmp <- length(oldcode)
  for (i in (1:nc.tmp)) {tmp.v[(var==oldcode[i])]=newcode[i]}
  if (is.factor(tmp.v)) {tmp.v1<-as.numeric(as.character(tmp.v))} else {tmp.v1<-
as.numeric(tmp.v)}
  rm(tmp.v); return(tmp.v1)
}

attach(EmpowerStatsR)
sink("C:/Users/15949/Desktop/Obesity/datastep/PROJ3_datastep.lst")
print("Creating new variable: SII.Q4")
SII.Q4<- rankvar(SII,4)
EmpowerStatsR<-cbind(EmpowerStatsR, SII.Q4)
print("Creating new variable: OBESITY.NEW")
OBESITY.NEW<- recodevar(OBESITY, c(1,2), c(1,0))
EmpowerStatsR<-cbind(EmpowerStatsR, OBESITY.NEW)
rm(SII.Q4, OBESITY.NEW)
detach(EmpowerStatsR)
sink()
vname<-c("_N_", "_STAT_", "_TOTAL_", "SEQN", "GENDER", "GENDER.1", "GENDER.2")
vname<-c(vname, "AGE", "RACE", "RACE.1", "RACE.2", "RACE.3", "RACE.4")
vlabel<-c(vlabel, "AGE", "RACE", " 1", " 2", " 3", " 4")
vname<-
c(vname, "EDUCATION.LEVEL", "EDUCATION.LEVEL.1", "EDUCATION.LEVEL.2", "EDUC
ATION.LEVEL.3")
vlabel<-c(vlabel, "EDUCATION.LEVEL", " 1", " 2", " 3")
vname<-
c(vname, "MARITAL.STATUS", "MARITAL.STATUS.1", "MARITAL.STATUS.2", "MARITAL.S
TATUS.3")
vlabel<-c(vlabel, "MARITAL.STATUS", " 1", " 2", " 3")
vname<-c(vname, "WTMECPRP", "RATIO.OF.FAMILY.INCOME.TO.POVERTY")

```

```

vlabel<-c(vlabel,"WTMECPRP","RATIO.OF.FAMILY.INCOME.TO.POVERTY")
vname<-
c(vname,"PIR","PIR.1","PIR.2","PIR.3","LYMPHOCYTE.NUMBER..1000.CELLS.UL.")
vlabel<-c(vlabel,"PIR"," 1"," 2"," 3","LYMPHOCYTE.NUMBER..1000.CELLS.UL.")
vname<-
c(vname,"NEUTROPHILS.NUM..1000.CELL.UL.,""PLATELET.COUNT..1000.CELLS.UL.")
vlabel<-
c(vlabel,"NEUTROPHILS.NUM..1000.CELL.UL.,""PLATELET.COUNT..1000.CELLS.UL.")
vname<-c(vname,"SII","LGSII","SMOKE","SMOKE.1","SMOKE.2","SMOKE.3")
vlabel<-c(vlabel,"SII","LGSII","SMOKE"," 1"," 2"," 3")
vname<-c(vname,"SLEEP.DISORDER","SLEEP.DISORDER.1","SLEEP.DISORDER.2")
vlabel<-c(vlabel,"SLEEP.DISORDER"," 1"," 2")
vname<-
c(vname,"VIGOROUS.RECREATIONAL.ACTIVITIES","VIGOROUS.RECREATIONAL.ACTI
VITIES.1","VIGOROUS.RECREATIONAL.ACTIVITIES.2")
vlabel<-c(vlabel,"VIGOROUS.RECREATIONAL.ACTIVITIES"," 1"," 2")
vname<-
c(vname,"DAYS.VIGOROUS.RECREATIONAL.ACTIVITIES","DAYS.VIGOROUS.RECREAT
IONAL.ACTIVITIES.1","DAYS.VIGOROUS.RECREATIONAL.ACTIVITIES.2","DAYS.VIGO
ROUS.RECREATIONAL.ACTIVITIES.3","DAYS.VIGOROUS.RECREATIONAL.ACTIVITIE
S.4","DAYS.VIGOROUS.RECREATIONAL.ACTIVITIES.5","DAYS.VIGOROUS.RECREATI
ONAL.ACTIVITIES.6","DAYS.VIGOROUS.RECREATIONAL.ACTIVITIES.7")
vlabel<-c(vlabel,"DAYS.VIGOROUS.RECREATIONAL.ACTIVITIES"," 1"," 2"," 3","
4"," 5"," 6"," 7")
vname<-c(vname,"MINUTES.VIGOROUS.RECREATIONAL.ACTIVITIES")
vlabel<-c(vlabel,"MINUTES.VIGOROUS.RECREATIONAL.ACTIVITIES")
vname<-
c(vname,"MODERATE.RECREATIONAL.ACTIVITIES","MODERATE.RECREATIONAL.AC
TIVITIES.1","MODERATE.RECREATIONAL.ACTIVITIES.2")
vlabel<-c(vlabel,"MODERATE.RECREATIONAL.ACTIVITIES"," 1"," 2")
vname<-
c(vname,"DAYS.MODERATE.RECREATIONAL.ACTIVITIES","DAYS.MODERATE.RECRE
ATIONAL.ACTIVITIES.1","DAYS.MODERATE.RECREATIONAL.ACTIVITIES.2","DAYS.M
ODERATE.RECREATIONAL.ACTIVITIES.3","DAYS.MODERATE.RECREATIONAL.ACTIV
ITIES.4","DAYS.MODERATE.RECREATIONAL.ACTIVITIES.5","DAYS.MODERATE.RECR
EATIONAL.ACTIVITIES.6","DAYS.MODERATE.RECREATIONAL.ACTIVITIES.7","DAYS.
MODERATE.RECREATIONAL.ACTIVITIES.99")
vlabel<-c(vlabel,"DAYS.MODERATE.RECREATIONAL.ACTIVITIES"," 1"," 2"," 3","
4"," 5"," 6"," 7"," 99")
vname<-c(vname,"MINUTES.MODERATE.RECREATIONAL.ACTIVITIES")
vlabel<-c(vlabel,"MINUTES.MODERATE.RECREATIONAL.ACTIVITIES")
vname<-c(vname,"ACTIVITY","ACTIVITY.1","ACTIVITY.2","ACTIVITY.3")
vlabel<-c(vlabel,"ACTIVITY"," 1"," 2"," 3")
vname<-c(vname,"DRINK","DRINK.1","DRINK.2","BODY.MASS.INDEX..KG.M..2.")

```

```

vlabel<-c(vlabel,"DRINK"," 1"," 2","BODY.MASS.INDEX..KG.M..2.")
vname<-c(vname,"WAIST.CIRCUMFERENCE..CM.,"ENERGY..KCAL.")
vlabel<-c(vlabel,"WAIST.CIRCUMFERENCE..CM.,"ENERGY..KCAL.")
vname<-c(vname,"OBESITY","OBESITY.1","OBESITY.2","ENERGY..1000KCAL.")
vlabel<-c(vlabel,"OBESITY"," 1"," 2","ENERGY..1000KCAL.")
vname<-c(vname,"SII.Q4","SII.Q4.0","SII.Q4.1","SII.Q4.2","SII.Q4.3")
vname<-c(vname,"OBESITY.NEW","OBESITY.NEW.0","OBESITY.NEW.1")
vlabel<-c(vlabel,"OBESITY NEW"," 0"," 1")
slt.vname<-c()

library(gdata,lib.loc=R.LibLocation)
library(geepack,lib.loc=R.LibLocation)
library(mgcv,lib.loc=R.LibLocation)

ofname<-"PROJ3_7_tbl1";
WD<-EmpowerStatsR; wd.subset="";
svy.DSN.YN <- FALSE;
weights<-1;weights.var <- NA;
WD<-cbind(WD,weights); WD<-WD[!is.na(weights),];
attach(WD)
subjvname<-NA;
yv<-cbind(OBESITY.NEW);
yvname<-c('OBESITY.NEW');
yvar<-c('OBESITY_NEW');
ydist<-c('binomial');
ylink<-c('logit');
ylv<-c(2);
xv<-cbind(SII.Q4);
xvname<-c('SII.Q4');
xvar<-c('SII_Q4');
xlv<-c(4);
sxf<-c(NA,0)[-1];
sv<-
cbind(GENDER,AGE,RACE,EDUCATION.LEVEL,MARITAL.STATUS,PIR,SMOKE,SLEEP.D
ISORDER,ACTIVITY,DRINK,ENERGY..1000KCAL.);
svname<-
c('GENDER','AGE','RACE','EDUCATION.LEVEL','MARITAL.STATUS','PIR','SMOKE','SLEEP
.DISORDER','ACTIVITY','DRINK','ENERGY..1000KCAL.');
```

```

svar<-
c('GENDER','AGE','RACE','EDUCATION_LEVEL','MARITAL_STATUS','PIR','SMOKE','SLEE
P_DISORDER','ACTIVITY','DRINK','ENERGY__1000KCAL_');
```

```

sdf<-c(NA,0,0,0,0,0,0,0,0,0)[-1];
slv<-c(2,0,4,3,3,3,3,2,3,2,0);
av<-cbind(GENDER,AGE,RACE);
```

```

avname<-c('GENDER','AGE','RACE');
if (!is.na(avname[1])) avlbl<-vlabel[match(avname, vname)];
nadj<-length(avname);alv<-c(2,0,4);
saf<-c(NA,0,0,0)[-1];
timev<-NA; timevname<-NA;
bv<-NA; bvar<-NA;
colv<-NA; colvname<-NA;
v.start<-NA; vname.start<-NA;
v.stop<-NA; vname.stop<-NA;
par1<-1;dec<-2;parm<-c(1,NA, 1,1, 0);
if (!exists("pdfwd")) pdfwd<-6;
if (!exists("pdfht")) pdfht<-6;
##R package## gdata geepack mgcv ##R package##;
pvformat<-function(p,dec) {
  pp <- sprintf(paste("%.",dec,"f",sep=""),as.numeric(p))
  if (is.matrix(pp)) {pp<-matrix(pp, nrow=nrow(p)); colnames(pp)<-colnames(p);rownames(pp)<-
rownames(p);}
  lw <- paste("<",substr("0.0000000000",1,dec+1),"1",sep="");
  pp[as.numeric(p)<(1/10^dec)]<-lw
  return(pp)
}
numfmt<-function(p,dec) {
  if (is.list(p)) p<-as.matrix(p)
  pp <- sprintf(paste("%.",dec,"f",sep=""),as.numeric(p))
  if (is.matrix(pp)) {pp<-matrix(pp, nrow=nrow(p));colnames(pp)<-colnames(p);rownames(pp)<-
rownames(p);}
  pp[as.numeric(p)>10000000]<- "inf."
  pp[is.na(p) | gsub(" ", "", p)==""]<- ""
  pp[p=="-Inf"]<- "-Inf"
  pp[p=="Inf"]<- "Inf"
  return(pp)
}
varstats<-function(var,vlvl,dec) {
  if (length(vlvl)==1 & vlvl[1]==0) {

return(paste(numfmt(mean(var,na.rm=TRUE),dec),numfmt(sd(var,na.rm=TRUE),dec),sep="+"))
  } else {
    a<-table(var)
    b<-matrix(paste(a, " (", numfmt(a/sum(a)*100,dec), "%)",sep=""),ncol=1)
    return(c(" ",b[match(vlvl,names(a))]))
  }
}
mat2htmltable<-function(mat) {

```

```

t1<- apply(mat,1,function(z) paste(z,collapse="</td><td>"))
t2<- paste("<tr><td>",t1,"</td></tr>")
return(paste(t2,collapse=" "))
}
setgam<-function(fml,yi) {
  if (ydist[yi]== "") ydist[yi]<-"gaussian"
  if (ydist[yi]=="exact") ydist[yi]<-"binomial"
  if (ydist[yi]=="breslow") ydist[yi]<-"binomial"
  if (ydist[yi]=="gaussian") mdl<-try(gam(formula(fml),weights=wdtmp$weights,data=wdtmp,
family=gaussian(link="identity")))
  if (ydist[yi]=="binomial") mdl<-try(gam(formula(fml),weights=wdtmp$weights,data=wdtmp,
family=binomial(link="logit")))
  if (ydist[yi]=="poisson") mdl<-try(gam(formula(fml),weights=wdtmp$weights,data=wdtmp,
family=poisson(link="log")))
  if (ydist[yi]=="gamma") mdl<-try(gam(formula(fml),weights=wdtmp$weights,data=wdtmp,
family=Gamma(link="inverse")))
  if (ydist[yi]=="negbin") mdl<-try(gam(formula(fml),weights=wdtmp$weights,data=wdtmp,
family=negbin(c(1,10), link="log")))
  return(mdl)
}
setgee<-function(fml,yi) {
  if (ydist[yi]== "") ydist[yi]<-"gaussian"
  if (ydist[yi]=="exact") ydist[yi]<-"binomial"
  if (ydist[yi]=="breslow") ydist[yi]<-"binomial"
  if
      (ydist[yi]=="gaussian")
      md<-
try(geeglm(formula(fml),id=wdtmp[,subjvname],corstr=gee.TYPE,family="gaussian",weights=w
dtmp$weights,data=wdtmp))
  if
      (ydist[yi]=="binomial")
      md<-
try(geeglm(formula(fml),id=wdtmp[,subjvname],corstr=gee.TYPE,family="binomial",weights=w
dtmp$weights,data=wdtmp))
  if
      (ydist[yi]=="poisson")
      md<-
try(geeglm(formula(fml),id=wdtmp[,subjvname],corstr=gee.TYPE,family="poisson",weights=wdt
mp$weights,data=wdtmp))
  if
      (ydist[yi]=="gamma")
      md<-
try(geeglm(formula(fml),id=wdtmp[,subjvname],corstr=gee.TYPE,family="Gamma",weights=wdt
mp$weights,data=wdtmp))
  if
      (ydist[yi]=="negbin")
      md<-
try(geeglm.nb(formula(fml),id=wdtmp[,subjvname],corstr=gee.TYPE,weights=wdtmp$weights,da
ta=wdtmp))
  return(md)
}
setglm<-function(fml,yi) {
  if (ydist[yi]== "") ydist[yi]<-"gaussian"
  if (ydist[yi]=="exact") ydist[yi]<-"binomial"

```



```

    if (ydist[yi]=="breslow") ydist[yi]<-"binomial"
    if (ydist[yi]=="gaussian") md<-
try(glm(formula(fml),family="gaussian",weights=wdtmp$weights,data=wdtmp))
    if (ydist[yi]=="binomial") md<-
try(glm(formula(fml),family="binomial",weights=wdtmp$weights,data=wdtmp))
    if (ydist[yi]=="poisson") md<-
try(glm(formula(fml),family="poisson",weights=wdtmp$weights,data=wdtmp))
    if (ydist[yi]=="gamma") md<-
try(glm(formula(fml),family="Gamma",weights=wdtmp$weights,data=wdtmp))
    if (ydist[yi]=="negbin") md<-try(glm.nb(formula(fml),weights=wdtmp$weights,data=wdtmp))
    return(md)
}
mdl2oo<-function(mdl, xxname, opt) {
  if (is.na(mdl[[1]][1])) return(list(rep("",times=length(xxname)), ""))
  if (substr(mdl[[1]][1],1,5)=="Error") return(list(rep("",times=length(xxname)), ""))
  gs<-summary(mdl); print(mdl$formula); print(gs)
  if (opt=="gam") {gsparm <- gs$p.table;tmpn<-gs$n;
} else {gsparm <- gs$coefficients;tmpn <- sum(gs$df[c(1,2)]);}
gsp<-gsparm[match(xxname,rownames(gsparm)),]
if (length(xxname)==1) {beta<-gsp[1]; se<-gsp[2]; pv<-gsp[4];
} else {beta<-gsp[,1]; se<-gsp[,2]; pv<-gsp[,4]; }
ci1<- beta-1.96*se; ci2<- beta+1.96*se
pvx<-substr(rep("****",length(pv)),1,(pv<=0.05)+(pv<=0.01)+(pv<=0.001))
if (colprn==3) {pvv<-pvx;} else {pvv<-pvformat(pv,dec+2);}
if ((colprn!=2) & (gs$family[[2]]=="log" | gs$family[[2]]=="logit")) {
  o1<-paste(numfmt(exp(beta),dec)," (" ,numfmt(exp(ci1),dec),"
,numfmt(exp(ci2),dec),")",sep="")
} else {
  if (colprn<3) {o1<-paste(numfmt(beta,dec), " (" ,numfmt(ci1,dec),"
,numfmt(ci2,dec),")",sep="")
} else {o1<-paste(numfmt(beta,dec), "+",numfmt(se,dec),sep="");}
}
o1<-paste(o1,pvv); o1[is.na(beta)]<-NA
if (length(xxname)>1) {
  if (gs$family[[2]]=="log" | gs$family[[2]]=="logit") {
    o1[is.na(o1) & substr(xxname,1,7)=="factor("<- "1.0"
} else {o1[is.na(o1) & substr(xxname,1,7)=="factor("<- "0";}
o1[is.na(o1)]<-"";
}
return(list(o1,tmpn))
}
}
recodevar <- function (var,oldcode,newcode) {
  tmp.v <- var
  nc.tmp <- length(oldcode)

```

```

    for (i in (1:nc.tmp)) {tmp.v[(var==oldcode[i])]=newcode[i]}
    if (is.factor(tmp.v)) {tmp.v1<-as.numeric(as.character(tmp.v))} else {tmp.v1<-
as.numeric(tmp.v)}
    rm(tmp.v); return(tmp.v1)
}
rankvar <- function(var, num) {
  qprobs <- 1/num
  if (num>2) {for (i in (2:(num-1))) {qprobs <- c(qprobs, 1/num * i) } }
  outvar <- rep(0, times=length(var))
  outvar[is.na(var)] <- NA
  cutpoints <- quantile(var,probs=qprobs, na.rm=TRUE)
  for (k in (1:length(cutpoints))) { outvar[var>=cutpoints[k]] <- k; }
  return(outvar)
}
removeNA<-function(i,j,m,wdf) {
  vvv<-c(yvname[i],adjvv[[m]],subjvname,colvname,bvar,vname.start,vname.stop,timevname);
  if (j<=nx) {vvv<-c(vvv,xvname[j]);} else {vvv<-c(vvv,xvname);}
  vvv<-vvv[!is.na(vvv)]; vvv<-vvv[vvv>" "]
  tmp<-is.na(wdf[,vvv]);
  return(wdf[apply(tmp,1,sum)==0,])
}
vlabelN<-(substr(vlabel,1,1)==" ");
vlabelZ<-vlabel[vlabelN];vlabelV<-vlabel[!vlabelN]
vnameV<-vname[!vlabelN];vnameZ<-vname[vlabelN]
w<-c("<html><head>","<meta http-equiv=\"Content-Type\" content=\"text/html\"
charset=\"gb2312\" /></head><body>")
if (!is.na(avname[1])) {
  if (sum((saf=="s" | saf=="S") & alv>0)>0) w<-c(w,"<br>Spline smoothing only applies for
continuous variables")
  if (!is.na(subjvname) & (sum((saf=="s" | saf=="S") & alv==0)>0)) w<-c(w,"<br>Generalized
estimate equation could not be used with spline smoothing terms")
}
if (!is.na(svname[1])) {
  if (sum((sdf=="s" | sdf=="S") & slv>0)>0) w<-c(w,"<br>Spline smoothing only applies for
continuous variables")
  if (!is.na(subjvname) & (sum((sdf=="s" | sdf=="S") & slv==0)>0)) w<-c(w,"<br>Generalized
estimate equation could not be used with spline smoothing terms")
}
allvname<-
c(yvname,xvname,colvname,bvar,avname,svname,subjvname,vname.start,vname.stop,timevname,
"weights");
allvname<-allvname[!is.na(allvname)]
WD<-WD[,allvname];
if (!is.na(subjvname)) WD<-WD[order(WD[,subjvname]),]

```

```

if (!is.na(sxf[1])) {
  if (sum(sxf>1 & xlv>0)>0) w<-c(w,"Categorizing only applies to continuous variables");
  if (sum(sxf>1 & xlv==0)>0) {
    t.xname<-NA;t.xlv<-NA; nx<-length(xvname)
    for (i in 1:nx) {
      if (sxf[i]>1 & xlv[i]==0) {
        tmp.Xi<- rankvar(WD[,xvname[i]],sxf[i])
        tmp.newcode <- tapply(WD[,xvname[i]],tmp.Xi,function(z) median(z,na.rm=TRUE))
        tmp.low <- tapply(WD[,xvname[i]],tmp.Xi,function(z) min(z,na.rm=TRUE))
        tmp.upp <- tapply(WD[,xvname[i]],tmp.Xi,function(z) max(z,na.rm=TRUE))
        tmp.Xi2<- recodevar(tmp.Xi,(1:sxf[i])-1,tmp.newcode)
        tmp.Xi<-cbind(tmp.Xi,tmp.Xi2)
        tmp.NM<-paste(xvname[i],c("grp","grp.cont"),sep=".")
        colnames(tmp.Xi)<-tmp.NM
        WD<-cbind(WD,tmp.Xi)
        t.xname<-c(t.xname,tmp.NM)
        t.xlv<-c(t.xlv,sxf[i],0)
        vnameV<-c(vnameV,tmp.NM)
        vlabelV<-c(vlabelV,paste(vlabelV[vnameV==xvname[i]],c("group","group trend")))
        vnameZ<-c(vnameZ,paste(tmp.NM[1],(1:sxf[i])-1,sep="."))
        vlabelZ<-c(vlabelZ,paste(tmp.low,"-",tmp.upp))
      } else {
        t.xname<-c(t.xname,xvname[i]); t.xlv<-c(t.xlv,xlv[i])
      }
    }
    xvname<-t.xname[-1]; xlv<-t.xlv[-1];
  }
}
rm(xv,yv,bv,av,sv,colv,v.start,v.stop)
if (!is.na(subjvname)) {
  if (!is.na(avname[1])) saf<-rep(0,length(saf));
  if (!is.na(svname[1])) sdf<-rep(0,length(sdf));
  WD<-WD[order(WD[,subjvname]),];
}
fmlm<-" "; fmlb<-"Non-adjusted"; tmp<-""; adjvv<-list(NA); adjvb<-"None";
fmlp<-ifelse(!is.na(subjvname), "gee", "glm");
na=0; avb=""; smoothav<-0; nadjm<-0
if (!is.na(avname[1])) {
  na<-length(avname)
  avb<-vlabelV[match(avname,vnameV)];
  avname_ <- avname
  smoothavi<-((saf=="s" | saf=="S") & alv==0)
  smoothav<-sum(smoothavi)
  smoothavname<-avname[smoothavi]
}

```

```

avname_[smoothavi]<-paste("s(",avname[smoothavi],")",sep="")
avb1<-avb
avb1[smoothavi]<-paste(avb[smoothavi],"(Smooth)",sep="")
avname_[alv>0]<-paste("factor(",avname[alv>0],")",sep="")
fmlm<-c(fmlm,paste("+",paste(avname_,collapse="+")))
fmlb<-c(fmlb,"Adjust")
nadjm<-nadjm+1; tmp<-c(tmp,"I"); adjvv[[nadjm+1]]<-avname;
adjvb<-c(adjvb, paste(avb1, collapse="; "))
fmlp<-c(fmlp,ifelse(!is.na(subjvname), "gee", ifelse(smoothav>0, "gam", "glm")))
}
ns=0; svb=""; smoothsv<-0
if (!is.na(svname[1])) {
  svb<-vlabelV[match(svname,vnameV)];
  svname_ <- svname
  smoothsvi<-((sdf=="s" | sdf=="S") & slv==0)
  smoothsv<-sum(smoothsvi)
  smoothsvname<-svname[smoothsvi]
  svname_[smoothsvi]<-paste("s(",svname[smoothsvi],")",sep="")
  svb1<-svb
  svb1[smoothsvi]<-paste(svb[smoothsvi],"(Smooth)",sep="")
  svname_[slv>0]<-paste("factor(",svname[slv>0],")",sep="")
  fmlm<-c(fmlm,paste("+",paste(svname_,collapse="+")))
  fmlb<-c(fmlb,"Adjust")
  nadjm<-nadjm+1; tmp<-c(tmp,"II"); adjvv[[nadjm+1]]<-svname
  adjvb<-c(adjvb, paste(svb1, collapse="; "))
  fmlp<-c(fmlp,ifelse(!is.na(subjvname), "gee", ifelse(smoothsv>0, "gam", "glm")))
}
if (is.na(parm[1]) & length(fmlm)>1) {
  fmlm<-fmlm[-1]; fmlb<-fmlb[-1]; tmp<-tmp[-1]; adjvv<-adjvv[-1]; adjvb<-adjvb[-1]; fmlp<-
  fmlp[-1];
}
if (nadjm>1) fmlb<-paste(fmlb,tmp)
nmdl<-length(fmlm)

ny=length(yvname); nx=length(xvname);
xb<-vlabelV[match(xvname,vnameV)]; xb[is.na(xb)]<-xvname[is.na(xb)]
yb<-vlabelV[match(yvname,vnameV)]; yb[is.na(yb)]<-yvname[is.na(yb)]
xvname_ <- xvname
xvname_[xlv>0]<-paste("factor(",xvname[xlv>0],")",sep="")
xxname_<-list(NA); xxlbl_<-list(NA); xxlvl_<-list(NA)
for (j in (1:nx)) {
  if (xlv[j]==0) {
    xxname_[[j+1]]<-xvname[j];xxlbl_[[j+1]]<-xb[j];xxlvl_[[j+1]]<-0
  } else {

```



```

      for (j in c(1:4)[-i]) {
        for (k in c(1:4)[-c(i,j)]) aa<-rbind(aa,c(i,j,k,c(1:4)[-c(i,j,k)]))
      }
    }
  if (is.na(parm[4])) parm[4]<-1
  rord<-aa[parm[4],]
  if (!is.na(bvar)) {prn<-"S";
} else {
  if (parm[4]>1) {
    rordc<-ifelse(rord[4]==1,3,4)
    prn<-c("G","Y","M","X")[rord[rordc]]
    if (prn=="X") {
      if (!contx & nx>1) prn<-ifelse(nmdl>1, "M", ifelse(ny>nx & contx, "X", "Y"))
      if (!contx & nx==1) prn<-"CX"
      if (par1==2) {tmp<-ifelse(rordc==4,ifelse(rord[3]==1,2,3),2); prn<-
c("G","Y","M","X")[rord[tmp]];}
    }
  } else {
    prn<-ifelse(nmdl>1, "M", ifelse(ny>nx & contx, "X", "Y"))
    if (par1==2) prn<-ifelse(nmdl>1, "M", "Y")
  }
  if (par1==3) prn<-"UM"
}
colprn<-parm[3];
sink(paste(ofname,".lst",sep=""))
if (par1==2) {xbgn<-nx+1; xend<-nx+1;} else {xbgn<-1; xend<-nx;}
if (prn=="Y") {
  tt<-c(0,0,0,0,"Exposure",yb); nn<-c(0,0,0,0,yb);
  for (k in (1:nclv)) {
    wdtmp0<-WD;
    if (!is.na(colvname)) {
      if (k<nclv) wdtmp0<-WD[WD[,colvname]==clv[k],];
      print(paste("Stratified by",colvname, ":", clvb[k]))
    }
  }
  for (m in 1:nmdl) {
    for (j in (xbgn:xend)) {
      colj<-cbind(k,0,m,j,xxlbl_[[j]])
      nnj <-c(k,0,m,j)
      for (i in (1:ny)) {
        fml<-paste(yvname[i],"~",xvname_[j],fmlm[m]);
        wdtmp<-removeNA(i,j,m,wdtmp0)
        if (!is.na(colvname)) {if (k==nclv) fml<-paste(fml,"+factor(",colvname,")",sep="");}
        if (fmlp[m]=="gam") tmp.mdl<-setgam(fml,i)
        if (fmlp[m]=="gee") tmp.mdl<-setgee(fml,i)
      }
    }
  }
}

```

```

        if (fmlp[m]=="glm") tmp.mdl<-setglm(fml,i)
        tmp.poi<-mdl2oo(tmp.mdl,xxname_[[j]],fmlp[m])
        colj<-cbind(colj,tmp.poi[[1]]); nnj<-c(nnj,tmp.poi[[2]])
      }
      tt<-rbind(tt,colj); nn<-rbind(nn,nnj)
    }
  }
}
}
}
if (prn=="S") {
  tt<-c(0,0,0,0,"Exposure",blvb); nn<-c(0,0,0,0,blvb);
  for (k in (1:nclv)) {
    wdtmp0<-WD;
    if (!is.na(colvname)) {
      if (k<nclv) wdtmp0<-WD[WD[,colvname]==clv[k],];
      print(paste("Stratified by",colvname, ":", clvb[k]))
    }
    for (i in (1:ny)) {
      for (m in 1:nmdl) {
        for (j in (xbgn:xend)) {
          colj<-cbind(k,i,m,j,xxlbl_[[j]]);
          nnj <- c(k,i,m,j)
          for (b in (1:nblv)) {
            print(paste("Stratified by",bvar, ":", blvb[b]))
            fml<-paste(yvname[i],"~",xvname_[j],fmlm[m]);
            if (b<nblv) {
              wdtmp1<-wdtmp0[wdtmp0[,bvar]==blv[b],];
            } else {
              wdtmp1<-wdtmp0; fml<-paste(fml,"+factor(",bvar,")",sep="");
            }
            wdtmp<-removeNA(i,j,m,wdtmp1)
            if (!is.na(colvname)) {if (k==nclv) fml<-paste(fml,"+factor(",colvname,")",sep="");}
            if (fmlp[m]=="gam") tmp.mdl<-setgam(fml,i)
            if (fmlp[m]=="gee") tmp.mdl<-setgee(fml,i)
            if (fmlp[m]=="glm") tmp.mdl<-setglm(fml,i)
            tmp.poi<-mdl2oo(tmp.mdl,xxname_[[j]],fmlp[m])
            colj<-cbind(colj,tmp.poi[[1]]); nnj<-c(nnj,tmp.poi[[2]])
          }
          tt<-rbind(tt,colj); nn<-rbind(nn,nnj)
        }
      }
    }
  }
}
}
}
}
}

```

```

if (prn=="M") {
  tt<-c(0,0,0,0,"Exposure",fmlb); nn<-c(0,0,0,0,fmlb)
  for (k in (1:nclv)) {
    wdtmp0<-WD;
    if (!is.na(colvname)) {
      if (k<nclv) wdtmp0<-WD[WD[,colvname]==clv[k],];
      print(paste("Stratified by",colvname, ":", clvb[k]))
    }
    for (i in 1:ny) {
      for (j in xbg:nxend) {
        colj<-cbind(k,i,0,j,xxlbl_[[j]]); nnj<-c(k,i,0,j)
        for (m in 1:nmdl) {
          fml<-paste(yvname[i],"~",xvname_[j],fmlm[m]);
          wdtmp<-removeNA(i,j,m,wdtmp0)
          if (!is.na(colvname)) {if (k==nclv) fml<-paste(fml,"+factor(",colvname,")",sep="");}
          if (fmlp[m]=="gam") tmp.mdl<-setgam(fml,i)
          if (fmlp[m]=="gee") tmp.mdl<-setgee(fml,i)
          if (fmlp[m]=="glm") tmp.mdl<-setglm(fml,i)
          tmppoi<-mdl2oo(tmp.mdl,xxname_[[j]],fmlp[m])
          colj<-cbind(colj,tmppoi[[1]]); nnj<-c(nnj,tmppoi[[2]])
        }
        tt<-rbind(tt,colj); nn<-rbind(nn,nnj)
      }
    }
  }
}

if (prn=="X") {
  tt<-c(0,0,0,0,"Outcome",xb); nn<-c(0,0,0,0,xb);
  for (k in (1:nclv)) {
    wdtmp0<-WD;
    if (!is.na(colvname)) {
      if (k<nclv) wdtmp0<-WD[WD[,colvname]==clv[k],];
      print(paste("Stratified by",colvname, ":", clvb[k]))
    }
    for (m in 1:nmdl) {
      for (i in (1:ny)) {
        colj<-cbind(k,i,m,0,yb[i])
        nnj <-c(k,i,m,0)
        for (j in (1:nx)) {
          fml<-paste(yvname[i],"~",xvname_[j],fmlm[m]);
          wdtmp<-removeNA(i,j,m,wdtmp0)
          if (!is.na(colvname)) {if (k==nclv) fml<-paste(fml,"+factor(",colvname,")",sep="");}
          if (fmlp[m]=="gam") tmp.mdl<-setgam(fml,i)
          if (fmlp[m]=="gee") tmp.mdl<-setgee(fml,i)
        }
      }
    }
  }
}

```



```

        if (fmlp[m]=="glm") tmp.mdl<-setglm(fml,i)
        tmpooi<-mdl2oo(tmp.mdl,xxname_[[j]],fmlp[m])
        colj<-cbind(colj,tmpooi[[1]]); nnj<-c(nnj,tmpooi[[2]])
      }
      tt<-rbind(tt,colj); nn<-rbind(nn,nnj)
    }
  }
}
}
if (prn=="CX") {
  tt<-c(0,0,0,0,"Outcome",xxlbl_[[1]][-1]); nn<-c(0,0,0,0,xb[1]);
  nxl<-length(xxlbl_[[1]])-1
  for (k in (1:nclv)) {
    wdtmp0<-WD;
    if (!is.na(colvname)) {
      if (k<nclv) wdtmp0<-WD[WD[,colvname]==clv[k],];
      print(paste("Stratified by",colvname, ":", clvb[k]))
    }
    for (m in 1:nmdl) {
      for (i in (1:ny)) {
        colj<-c(k,i,m,0,yb[i])
        nnj <-c(k,i,m,0)
        fml<-paste(yvname[i],"~",xvname_[1],fmlm[m]);
        wdtmp<-removeNA(i,1,m,wdtmp0)
        if (!is.na(colvname)) {if (k==nclv) fml<-paste(fml,"+factor(",colvname,")",sep="");}
        if (fmlp[m]=="gam") tmp.mdl<-setgam(fml,i)
        if (fmlp[m]=="gee") tmp.mdl<-setgee(fml,i)
        if (fmlp[m]=="glm") tmp.mdl<-setglm(fml,i)
        tmpooi<-mdl2oo(tmp.mdl,xxname_[[1]],fmlp[m])
        colj<-c(colj,tmpooi[[1]][-1]); nnj<-c(nnj,tmpooi[[2]])
        tt<-rbind(tt,colj); nn<-rbind(nn,nnj)
      }
    }
  }
}
}
if (prn=="UM") {
  tt<-c(0,0,0,0,"Exposure","Univariable","Multivariable");
  nn<-
c(0,0,0,0,"Univariable","Multivariable")
  for (k in (1:nclv)) {
    wdtmp0<-WD;
    if (!is.na(colvname)) {
      if (k<nclv) wdtmp0<-WD[WD[,colvname]==clv[k],];
      print(paste("Stratified by",colvname, ":", clvb[k]))
    }
  }
}

```

```

for (i in 1:ny) {
  for (m in 1:nmdl) {
    colm<-rep(NA,6); nnm<-rep(NA,5)
    for (j in 1:(nx+1)) {
      colj<-cbind(k,i,m,j,xxlbl_[[j]]); nnj<-c(k,i,m,j)
      fml<-paste(yvname[i],"~",xvname_[j],fmlm[m]);
      wdtmp<-removeNA(i,j,m,wdtmp0)
      if (!is.na(colvname)) {if (k==nc1v) fml<-paste(fml,"+factor(",colvname,")",sep="");}
      if (fmlp[m]=="gam") tmp.mdl<-setgam(fml,i)
      if (fmlp[m]=="gee") tmp.mdl<-setgee(fml,i)
      if (fmlp[m]=="glm") tmp.mdl<-setglm(fml,i)
      tmppoi<-mdl2oo(tmp.mdl,xxname_[[j]],fmlp[m])
      colj<-cbind(colj,tmppoi[[1]]); nnj<-c(nnj,tmppoi[[2]])
      if (j<=nx) {colm<-rbind(colm,colj); nnm<-rbind(nnm,nnj);
      } else {colm<-cbind(colm[-1,],tmppoi[[1]]); nnm<-cbind(nnm[-1,],tmppoi[[2]]);}
    }
    tt<-rbind(tt,colm); nn<-rbind(nn,nnm)
  }
}
}
}
}
sink()
if (!contx & prn!="CX") rord<-c(rord[rord!=4],4)
if (prn=="X" | prn=="CX") rord<-rord[rord!=4]
if (prn=="Y") rord<-rord[rord!=2]
if (prn=="M") rord<-rord[rord!=3]
if (nx==1 & contx) rord<-rord[rord!=4]
if (nmdl==1) rord<-rord[rord!=3]
if (ny==1) rord<-rord[rord!=2]
if (is.na(colvname)) rord<-rord[rord!=1]
if (length(rord)==0) rord<-1
nrr<-length(rord)
for (i in nrr:1) {nn<-nn[order(as.numeric(nn[,rord[i]])),];tt<-tt[order(as.numeric(tt[,rord[i]])),];}
if (nn[2,4]>0) {nn[,4]<-c("Exposure",xb[as.numeric(nn[-1,4])]); } else {nn<-nn[,-4];}
if (nn[2,3]>0) {nn[,3]<-c("Model",fmlb[as.numeric(nn[-1,3])]); } else {nn<-nn[,-3];}
if (nn[2,2]>0) {nn[,2]<-c("Outcome",yb[as.numeric(nn[-1,2])]); } else {nn<-nn[,-2];}
if (!is.na(colvname)) {nn[,1]<-c(vlabel[vname==colvname],clvb_[as.numeric(nn[-1,1])]); } else
{nn<-nn[,-1];}
tb<-matrix(as.numeric(tt[,c(1:4)]),ncol=4);
if (!is.na(colvname)) {tt[,1]<-c(vlabelV[vnameV==colvname],clvb[tb[-1,1]]);}
if (ny>1) {tt[,2]<-c("Outcome",yb[tb[-1,2]]);}
if (nmdl>1) {tt[,3]<-c("Model",fmlb[tb[-1,3]]);}
nrr1<-nrr-1; oo<-tt[1,]; nc<-ncol(tt)-5; nr<-nrow(tt)
for (i in 2:nr) {

```

```

if (nrr>1) {
  for (j in 1:nrr1) {
    if (tb[i,rord[j]]!=tb[i-1,rord[j]]) oo<-rbind(oo,c(rep(tt[i,rord[j]],5),rep(" ",nc)))
  }
}
oo<-rbind(oo,tt[i,])
}
if (rord[nrr]!=4 & tt[1,rord[nrr]]!="0") {oo<-cbind(oo[,rord[nrr]],oo[,-(1:5)]);} else {oo<-oo[,-(1:4)]}
w<-c(w,paste("<h2>", title, "</h2>"))
w<-c(w,"<br><table border=3>", mat2htmltable(oo), "</table>")
prnpt<-c("β (95%CI) Pvalue / OR (95%CI) Pvalue", "β (95%CI) Pvalue", "β+se / OR (95%CI)
**P<0.05 ***P<0.01 ****P<0.001")

```
